# Supplementary material
Source: publisher figshare collection journal article supplement (https://gsapubs.figshare.com/articles/dataset/_/12530411)
Supplement: Supplementary file 1 [file 1]

## SUPPLEMENTAL MATERIALS

## Quench rate calculation

Quench rates were estimated using the following equation (Xu and Zhang, 2002):

$$q=(T_{ae}-T_{ff})h/\rho C_p L$$

where  $T_{ae}$  is the apparent equilibrium temperature,  $T_{ff}$  is the glass transition temperature,  $h$  is the heat transfer coefficient,  $\rho$  is material density,  $C_p$  is the heat capacity of basalt, and  $L$  is the effective half thickness of the object (volume/surface area). We assumed an equilibrium temperature of 1450 K, a glass transition temperature of 1000 K (Gregg and Zimbelman, 2000), a heat transfer coefficient of  $50 \text{ W m}^{-2} \text{ K}^{-1}$  (Robertson, 1988), a density of  $2750 \text{ kg m}^{-3}$ , and heat capacity of  $1200 \text{ J kg}^{-1} \text{ K}^{-1}$  (Greg and Zimbelman, 2000). To determine  $L$ , we assumed the plate shapes were rectangular prisms with the dimensions reported in Table 1.

## Figures and Video

Back-scattered electron images of the brown and black scoria are provided for reference (Fig. DR1). Additional thin sections are provided to show the range of textures observed within the plate tephra (Fig. DR2).

Video DR1: Observations of one fragmenting slug concurrent with fire fountaining were conducted on video provided by Patricio Oberg.

## References

- Gregg, T.K.P., and Zimbelman, J.R., 2000, Volcanic Vestiges, *in* Zimbelman, J.R. and Gregg, T.K.P. eds., Environmental Effects on Volcanic Eruptions: From Deep Oceans to Deep Space, Kluwer Academic/Plenum Publishers, p. 243-251.
- Robertson, E.C., 1988, Thermal properties of rocks: U.S. Geologic Survey Open-File Report 88-441, 106 p.
- Xu, Z., and Zhang, Y., 2002, Quench rates in air, water, and liquid nitrogen, and inferences of temperature in volcanic eruption columns: Earth and Planetary Science Letters, v. 200, p. 315-330.

## **FIGURE CAPTIONS**

Figure DR1. Back-scattered electron images of brown scoria (A) and black scoria (B). Note that images were collected at the same scale.

Figure DR2. An assortment of plate tephra in thin section. All tephra are at approximately the same scale. Note the ubiquitously aligned plagioclase crystals, the presence of flow banding and wide range of vesicularity.

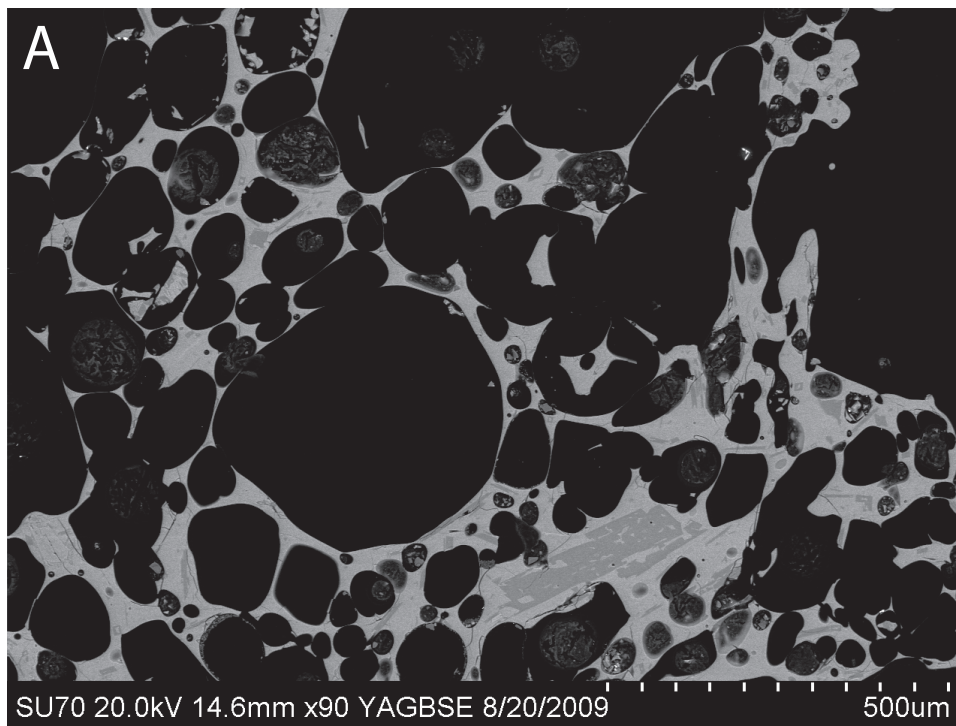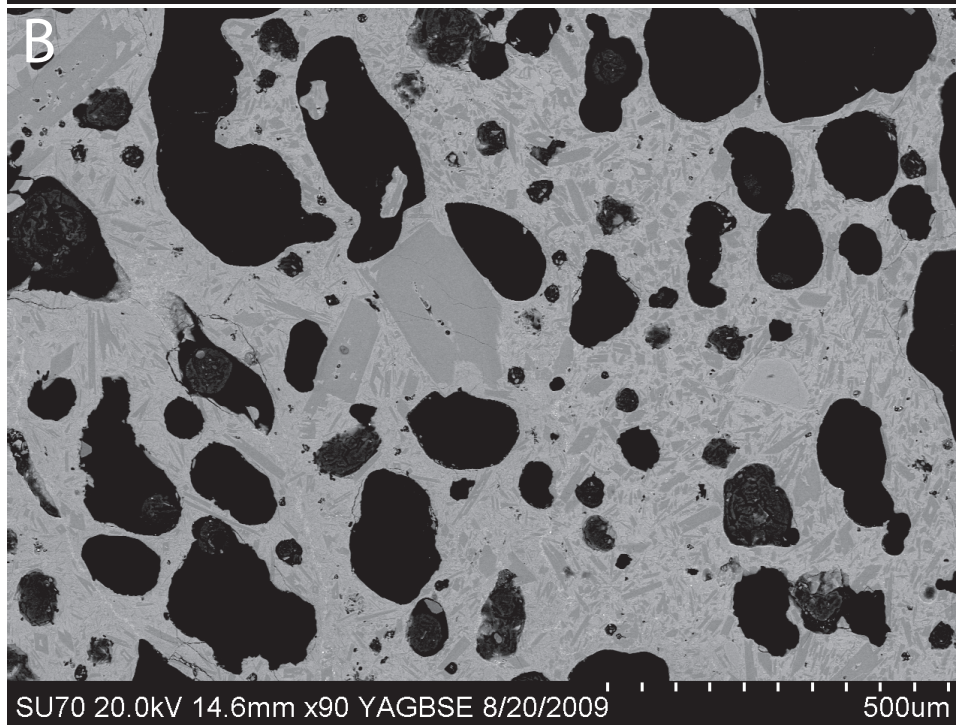

~3 cm

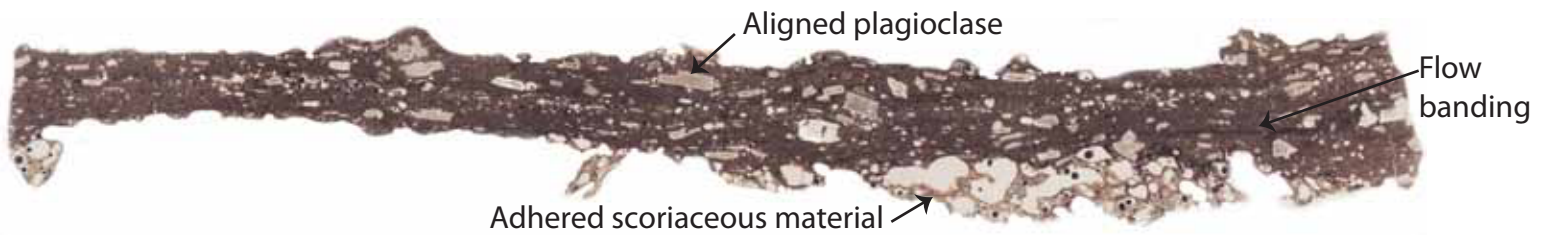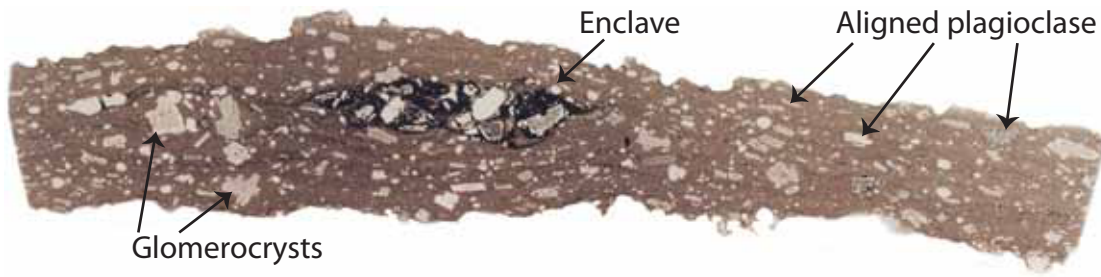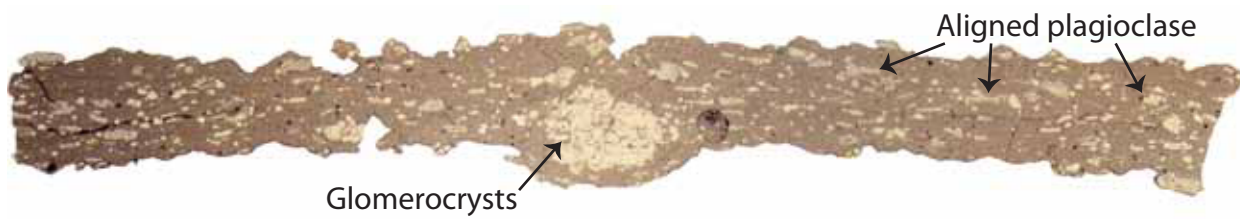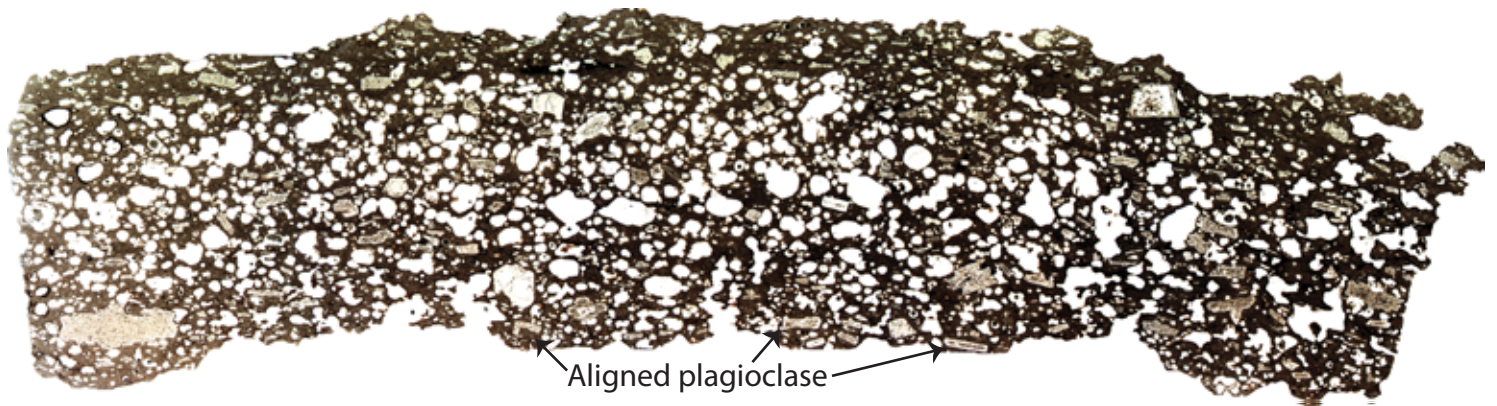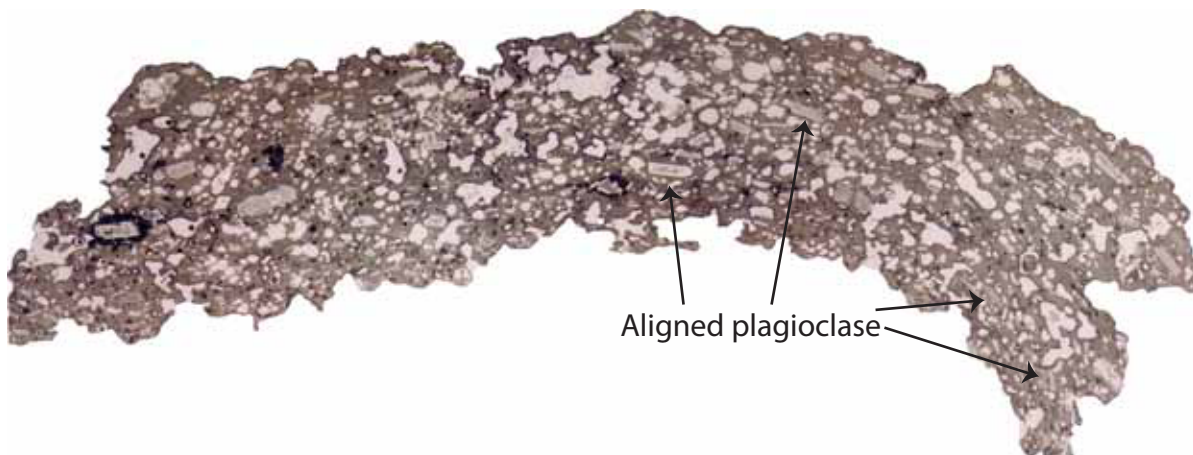

Datum: Provisional SA 1956

Discrepancies in UTM coordinates due to different GPS units being used.

| Easting | Northing | Major (cm)        | Intermediate (cm) | Minor (cm) | Average | Major (cm) | Intermediate (cm) | Minor (cm) |
|---------|----------|-------------------|-------------------|------------|---------|------------|-------------------|------------|
| 267158  | 5715550  | 3                 | 2                 | 1          |         | 2.9        | 1.7               | 1.0        |
| 267158  | 5715550  | 3                 | 2                 | 1.8        |         |            |                   |            |
| 267158  | 5715550  | 3                 | 1.5               | 0.8        |         |            |                   |            |
| 267158  | 5715550  | 3.2               | 1.5               | 0.8        |         |            |                   |            |
| 267158  | 5715550  | 3.2               | 1                 | 0.6        |         |            |                   |            |
| 267158  | 5715550  | 2                 | 2                 | 0.8        |         |            |                   |            |
| 267189  | 5715580  | 5                 | 4.5               | 1.8        |         | 4.9        | 3.2               | 1.7        |
| 267189  | 5715580  | 4.1               | 3                 | 1          |         |            |                   |            |
| 267189  | 5715580  | 4                 | 1.7               | 1.9        |         |            |                   |            |
| 267189  | 5715580  | 4.3               | 3.4               | 1.5        |         |            |                   |            |
| 267189  | 5715580  | 5.2               | 3                 | 1.2        |         |            |                   |            |
| 267189  | 5715580  | 5.1               | 2.5               | 1.8        |         |            |                   |            |
| 267189  | 5715580  | 6                 | 3                 | 1.8        |         |            |                   |            |
| 267189  | 5715580  | 6.5               | 4.7               | 2          |         |            |                   |            |
| 267189  | 5715580  | 5                 | 3.5               | 2          |         |            |                   |            |
| 267189  | 5715580  | 4.5               | 3.4               | 2.1        |         |            |                   |            |
| 267189  | 5715580  | 4.9               | 2.9               | 1.5        |         |            |                   |            |
| 267189  | 5715580  | 4                 | 2.7               | 2          |         |            |                   |            |
| 267683  | 5714231  | sparse new scoria |                   |            |         |            |                   |            |
| 267794  | 5714052  | 7.7               | 6.8               | 6.3        |         | 6.6        | 5.6               | 4.5        |
| 267794  | 5714052  | 8.3               | 6.6               | 5.2        |         |            |                   |            |
| 267794  | 5714052  | 9.0               | 6.4               | 3.9        |         |            |                   |            |
| 267794  | 5714052  | 6.8               | 6.2               | 6.0        |         |            |                   |            |
| 267794  | 5714052  | 8.0               | 5.7               | 4.4        |         |            |                   |            |
| 267794  | 5714052  | 6.4               | 5.3               | 5.2        |         |            |                   |            |
| 267794  | 5714052  | 7.0               | 6.4               | 3.2        |         |            |                   |            |
| 267794  | 5714052  | 6.9               | 4.4               | 4.7        |         |            |                   |            |
| 267794  | 5714052  | 6.0               | 5.0               | 4.6        |         |            |                   |            |
| 267794  | 5714052  | 5.6               | 5.2               | 4.6        |         |            |                   |            |



|        |         |               |     |     |     |     |     |
|--------|---------|---------------|-----|-----|-----|-----|-----|
| 267794 | 5714052 | 5.3           | 5.9 | 4.2 |     |     |     |
| 267794 | 5714052 | 5.4           | 5.2 | 4.5 |     |     |     |
| 267794 | 5714052 | 6.6           | 5.0 | 3.0 |     |     |     |
| 267794 | 5714052 | 5.1           | 5.6 | 3.6 |     |     |     |
| 267794 | 5714052 | 4.7           | 4.0 | 4.2 |     |     |     |
| 267837 | 5714741 | 6.9           | 3   | 3.5 | 5.0 | 3.0 | 2.2 |
| 267837 | 5714741 | 6.1           | 4   | 2.5 |     |     |     |
| 267837 | 5714741 | 5             | 4   | 2.6 |     |     |     |
| 267837 | 5714741 | 6             | 3.5 | 2   |     |     |     |
| 267837 | 5714741 | 5.5           | 3   | 2.5 |     |     |     |
| 267837 | 5714741 | 4             | 2   | 1.5 |     |     |     |
| 267837 | 5714741 | 5             | 4   | 2.5 |     |     |     |
| 267837 | 5714741 | 4             | 1.5 | 2   |     |     |     |
| 267837 | 5714741 | 3.5           | 2   | 0.7 |     |     |     |
| 267837 | 5714741 | 3.5           | 2.5 | 2.5 |     |     |     |
| 267921 | 5714560 | no new scoria |     |     |     |     |     |
| 268009 | 5713603 | 8.0           | 6.5 | 4.7 | 5.6 | 5.1 | 4.0 |
| 268009 | 5713603 | 6.8           | 5.8 | 4.9 |     |     |     |
| 268009 | 5713603 | 7.0           | 4.7 | 4.2 |     |     |     |
| 268009 | 5713603 | 5.7           | 5.0 | 4.9 |     |     |     |
| 268009 | 5713603 | 5.9           | 5.0 | 4.5 |     |     |     |
| 268009 | 5713603 | 6.3           | 5.0 | 4.0 |     |     |     |
| 268009 | 5713603 | 5.7           | 6.5 | 3.0 |     |     |     |
| 268009 | 5713603 | 5.0           | 5.9 | 4.3 |     |     |     |
| 268009 | 5713603 | 6.4           | 4.9 | 3.8 |     |     |     |
| 268009 | 5713603 | 5.0           | 5.4 | 4.0 |     |     |     |
| 268009 | 5713603 | 4.4           | 4.3 | 4.7 |     |     |     |
| 268009 | 5713603 | 4.1           | 5.2 | 3.6 |     |     |     |
| 268009 | 5713603 | 5.0           | 5.1 | 2.8 |     |     |     |
| 268009 | 5713603 | 5.0           | 4.0 | 3.7 |     |     |     |

|        |         |     |     |     |     |     |     |
|--------|---------|-----|-----|-----|-----|-----|-----|
| 268009 | 5713603 | 3.4 | 3.7 | 3.0 |     |     |     |
| 268058 | 5712453 | 3   | 2.4 | 1.1 | 3.3 | 2.4 | 1.4 |
| 268058 | 5712453 | 4.6 | 2.7 | 1.3 |     |     |     |
| 268058 | 5712453 | 3.2 | 2.1 | 1.8 |     |     |     |
| 268058 | 5712453 | 2.2 | 2.4 | 0.8 |     |     |     |
| 268058 | 5712453 | 4.1 | 2.1 | 1.1 |     |     |     |
| 268058 | 5712453 | 3.6 | 2.2 | 2   |     |     |     |
| 268058 | 5712453 | 2.2 | 1.8 | 0.5 |     |     |     |
| 268058 | 5712453 | 2.8 | 1.5 | 1.3 |     |     |     |
| 268058 | 5712453 | 3.4 | 1.5 | 0.8 |     |     |     |
| 268058 | 5712453 | 4.3 | 3.1 | 0.9 |     |     |     |
| 268058 | 5712453 | 2.5 | 2.4 | 1   |     |     |     |
| 268058 | 5712453 | 3.8 | 3.2 | 1.6 |     |     |     |
| 268058 | 5712453 | 3.7 | 2.6 | 1.9 |     |     |     |
| 268058 | 5712453 | 3.2 | 2.6 | 1.9 |     |     |     |
| 268058 | 5712453 | 3.5 | 3.2 | 2.8 |     |     |     |
| 268058 | 5712453 | 3.6 | 2.5 | 1.8 |     |     |     |
| 268058 | 5712453 | 2.6 | 2.1 | 1.4 |     |     |     |
| 268154 | 5713170 | 5.2 | 3.3 | 1.8 | 3.9 | 2.4 | 1.9 |
| 268154 | 5713170 | 3.5 | 1.6 | 2.1 |     |     |     |
| 268154 | 5713170 | 4.5 | 3.5 | 2.1 |     |     |     |
| 268154 | 5713170 | 2.3 | 1   | 2.4 |     |     |     |
| 268154 | 5713170 | 4   | 2.4 | 1.2 |     |     |     |
| 268198 | 5713603 | 2.7 | 2   | 1.6 | 2.9 | 2.0 | 1.2 |
| 268198 | 5713603 | 2.8 | 1.5 | 1   |     |     |     |
| 268198 | 5713603 | 1.9 | 1.3 | 1.6 |     |     |     |
| 268198 | 5713603 | 3.2 | 1.9 | 1.2 |     |     |     |
| 268198 | 5713603 | 2   | 1.7 | 1   |     |     |     |
| 268198 | 5713603 | 2   | 1.5 | 0.8 |     |     |     |
| 268198 | 5713603 | 3.9 | 2.2 | 1   |     |     |     |
| 268198 | 5713603 | 4   | 3.5 | 2.5 |     |     |     |



|        |         |     |     |     |     |     |     |
|--------|---------|-----|-----|-----|-----|-----|-----|
| 268198 | 5713603 | 2.3 | 2.1 | 1.2 |     |     |     |
| 268198 | 5713603 | 3.5 | 1.7 | 1.3 |     |     |     |
| 268198 | 5713603 | 3.3 | 2   | 0.8 |     |     |     |
| 268198 | 5713603 | 2.9 | 2.3 | 0.8 |     |     |     |
| 268235 | 5713143 | 2.6 | 2.6 | 1.2 | 2.5 | 1.8 | 1.1 |
| 268235 | 5713143 | 2.5 | 1.8 | 1   |     |     |     |
| 268235 | 5713143 | 2.7 | 1.7 | 1   |     |     |     |
| 268235 | 5713143 | 3.5 | 1.7 | 0.5 |     |     |     |
| 268235 | 5713143 | 5.5 | 3.7 | 2.8 |     |     |     |
| 268235 | 5713143 | 1.5 | 1   | 1   |     |     |     |
| 268235 | 5713143 | 1.6 | 1.4 | 0.5 |     |     |     |
| 268235 | 5713143 | 2   | 1.5 | 1.3 |     |     |     |
| 268235 | 5713143 | 1.9 | 1.7 | 0.8 |     |     |     |
| 268235 | 5713143 | 2.4 | 1.9 | 1   |     |     |     |
| 268235 | 5713143 | 2   | 1.9 | 1.3 |     |     |     |
| 268235 | 5713143 | 1.7 | 1.2 | 0.7 |     |     |     |
| 268267 | 5714012 | 3   | 1.4 | 0.4 | 3.3 | 1.9 | 1.2 |
| 268267 | 5714012 | 3   | 1.4 | 0.4 |     |     |     |
| 268267 | 5714012 | 3.5 | 1   | 0.4 |     |     |     |
| 268267 | 5714012 | 3.4 | 2.2 | 0.8 |     |     |     |
| 268267 | 5714012 | 4   | 2.7 | 2.5 |     |     |     |
| 268267 | 5714012 | 3.5 | 2.9 | 1.8 |     |     |     |
| 268267 | 5714012 | 2.5 | 0.7 | 0.6 |     |     |     |
| 268267 | 5714012 | 1.7 | 0.8 | 0.7 |     |     |     |
| 268267 | 5714012 | 1.4 | 1.3 | 0.4 |     |     |     |
| 268272 | 5714005 | 2.9 | 1.2 | 1.3 |     |     |     |
| 268272 | 5714005 | 4.1 | 2.5 | 2.3 |     |     |     |
| 268272 | 5714005 | 5   | 2.4 | 1.8 |     |     |     |
| 268272 | 5714005 | 3.5 | 2.2 | 1.2 |     |     |     |
| 268272 | 5714005 | 4   | 2.5 | 1.7 |     |     |     |
| 268272 | 5714005 | 4.3 | 3   | 2.2 |     |     |     |

|        |         |     |     |     |     |     |     |
|--------|---------|-----|-----|-----|-----|-----|-----|
| 268545 | 5712895 | 7.8 | 6.1 | 3.6 | 5.5 | 4.2 | 3.4 |
| 268545 | 5712895 | 7.4 | 6.8 | 2.8 |     |     |     |
| 268545 | 5712895 | 6.4 | 5.2 | 4.1 |     |     |     |
| 268545 | 5712895 | 6.0 | 4.4 | 4.3 |     |     |     |
| 268545 | 5712895 | 5.2 | 5.1 | 4.2 |     |     |     |
| 268545 | 5712895 | 6.3 | 4.4 | 3.6 |     |     |     |
| 268545 | 5712895 | 5.4 | 5.0 | 3.0 |     |     |     |
| 268545 | 5712895 | 5.0 | 3.9 | 3.0 |     |     |     |
| 268545 | 5712895 | 6.2 | 2.8 | 2.7 |     |     |     |
| 268545 | 5712895 | 5.1 | 3.2 | 3.2 |     |     |     |
| 268545 | 5712895 | 3.5 | 3.8 | 4.2 |     |     |     |
| 268545 | 5712895 | 4.0 | 3.5 | 3.6 |     |     |     |
| 268545 | 5712895 | 5.4 | 2.3 | 3.0 |     |     |     |
| 268545 | 5712895 | 3.8 | 3.6 | 3.0 |     |     |     |
| 268545 | 5712895 | 4.6 | 3.0 | 2.8 |     |     |     |
| 268570 | 5712209 | 3   | 2   | 1.3 | 3.0 | 2.2 | 1.7 |
| 268570 | 5712209 | 2.5 | 2.4 | 1.8 |     |     |     |
| 268570 | 5712209 | 2.6 | 2   | 1   |     |     |     |
| 268570 | 5712209 | 4.5 | 3.3 | 3   |     |     |     |
| 268570 | 5712209 | 3.5 | 2.3 | 1.8 |     |     |     |
| 268570 | 5712209 | 3.5 | 2.5 | 2   |     |     |     |
| 268570 | 5712209 | 3   | 2   | 1.3 |     |     |     |
| 268570 | 5712209 | 2.6 | 2   | 1.5 |     |     |     |
| 268570 | 5712209 | 2.5 | 2   | 2   |     |     |     |
| 268570 | 5712209 | 2.5 | 1.5 | 1   |     |     |     |
| 268746 | 5712931 | 4.7 | 4   | 2.4 | 2.6 | 1.9 | 0.8 |
| 268746 | 5712931 | 1.8 | 1.2 | 0.7 |     |     |     |
| 268746 | 5712931 | 3.4 | 2   | 0.4 |     |     |     |
| 268746 | 5712931 | 3.1 | 1.7 | 0.5 |     |     |     |
| 268746 | 5712931 | 3.5 | 1.7 | 0.8 |     |     |     |
| 268746 | 5712931 | 2   | 1.6 | 0.8 |     |     |     |
| 268746 | 5712931 | 3   | 2   | 0.8 |     |     |     |

|        |         |     |     |     |     |     |     |
|--------|---------|-----|-----|-----|-----|-----|-----|
| 268746 | 5712931 | 2.5 | 2   | 1.5 |     |     |     |
| 268746 | 5712931 | 2   | 2   | 0.3 |     |     |     |
| 268746 | 5712931 | 1.5 | 1.5 | 0.5 |     |     |     |
| 268746 | 5712931 | 1.9 | 1.5 | 0.5 |     |     |     |
| 268746 | 5712931 | 2.3 | 1.6 | 0.7 |     |     |     |
| 268772 | 5713657 | 7.4 | 5.9 | 4.4 | 6.4 | 4.8 | 3.7 |
| 268772 | 5713657 | 6.5 | 6.0 | 4.2 |     |     |     |
| 268772 | 5713657 | 6.9 | 6.5 | 2.6 |     |     |     |
| 268772 | 5713657 | 5.9 | 5.0 | 4.9 |     |     |     |
| 268772 | 5713657 | 6.9 | 4.2 | 4.6 |     |     |     |
| 268772 | 5713657 | 6.2 | 4.1 | 5.3 |     |     |     |
| 268772 | 5713657 | 7.0 | 5.0 | 3.4 |     |     |     |
| 268772 | 5713657 | 6.9 | 4.6 | 3.4 |     |     |     |
| 268772 | 5713657 | 6.0 | 5.1 | 3.7 |     |     |     |
| 268772 | 5713657 | 8.1 | 4.4 | 2.1 |     |     |     |
| 268772 | 5713657 | 6.0 | 3.9 | 3.9 |     |     |     |
| 268772 | 5713657 | 5.6 | 5.0 | 3.0 |     |     |     |
| 268772 | 5713657 | 5.0 | 4.7 | 3.0 |     |     |     |
| 268772 | 5713657 | 6.0 | 3.0 | 3.6 |     |     |     |
| 268772 | 5713657 | 5.0 | 4.0 | 3.0 |     |     |     |
| 269003 | 5713728 | 5   | 3.7 | 2.5 | 2.6 | 2.0 | 1.3 |
| 269003 | 5713728 | 2.3 | 2.5 | 2   |     |     |     |
| 269003 | 5713728 | 2.2 | 2.2 | 1   |     |     |     |
| 269004 | 5713727 | 3   | 1   | 0.5 |     |     |     |
| 269004 | 5713727 | 2.5 | 2   | 0.7 |     |     |     |
| 269004 | 5713727 | 2.5 | 1.6 | 0.8 |     |     |     |
| 269004 | 5713727 | 3.1 | 2   | 1.3 |     |     |     |
| 269004 | 5713727 | 2.1 | 1.1 | 1   |     |     |     |
| 269004 | 5713727 | 1.8 | 1   | 1   |     |     |     |
| 269004 | 5713727 | 2.5 | 2.2 | 1.9 |     |     |     |
| 269004 | 5713727 | 2   | 1.8 | 1.3 |     |     |     |
| 269004 | 5713727 | 2.7 | 2.5 | 2.1 |     |     |     |

|        |         |     |     |     |     |     |     |
|--------|---------|-----|-----|-----|-----|-----|-----|
| 269014 | 5712036 | 4   | 2.8 | 1.5 | 3.7 | 2.6 | 1.2 |
| 269014 | 5712036 | 3.7 | 3.5 | 1.5 |     |     |     |
| 269014 | 5712036 | 3.2 | 1.8 | 1.4 |     |     |     |
| 269014 | 5712036 | 3.2 | 2.4 | 2.1 |     |     |     |
| 269014 | 5712036 | 4.6 | 2.1 | 0.4 |     |     |     |
| 269014 | 5712036 | 4.7 | 3.5 | 0.9 |     |     |     |
| 269014 | 5712036 | 5.6 | 2.9 | 2   |     |     |     |
| 269014 | 5712036 | 3.7 | 2.1 | 0.5 |     |     |     |
| 269014 | 5712036 | 2.8 | 1.8 | 0.7 |     |     |     |
| 269014 | 5712036 | 2.4 | 2.2 | 1   |     |     |     |
| 269014 | 5712036 | 3.1 | 3   | 0.7 |     |     |     |
| 269014 | 5712036 | 3   | 2.7 | 1.7 |     |     |     |
| 269236 | 5712696 | 5.2 | 2.5 | 1.2 | 3.0 | 1.9 | 0.9 |
| 269236 | 5712696 | 3   | 2   | 1.2 |     |     |     |
| 269236 | 5712696 | 3   | 1.4 | 0.6 |     |     |     |
| 269236 | 5712696 | 2.7 | 2.2 | 0.5 |     |     |     |
| 269236 | 5712696 | 2.2 | 2   | 0.5 |     |     |     |
| 269236 | 5712696 | 2.8 | 1.6 | 1   |     |     |     |
| 269236 | 5712696 | 3   | 1.9 | 0.9 |     |     |     |
| 269236 | 5712696 | 2.9 | 1.5 | 0.4 |     |     |     |
| 269236 | 5712696 | 2.9 | 2   | 1.4 |     |     |     |
| 269236 | 5712696 | 3.3 | 2   | 1.5 |     |     |     |
| 269236 | 5712696 | 2.2 | 1.7 | 1   |     |     |     |
| 269236 | 5712696 | 2.6 | 1.7 | 0.5 |     |     |     |
| 269334 | 5712684 | 5.0 | 4.9 | 4.2 | 4.5 | 3.5 | 2.7 |
| 269334 | 5712684 | 4.7 | 4.5 | 3.2 |     |     |     |
| 269334 | 5712684 | 5.1 | 4.2 | 3.0 |     |     |     |
| 269334 | 5712684 | 5.2 | 3.2 | 3.7 |     |     |     |
| 269334 | 5712684 | 4.9 | 4.2 | 2.4 |     |     |     |
| 269334 | 5712684 | 5.0 | 3.4 | 2.9 |     |     |     |
| 269334 | 5712684 | 4.1 | 3.9 | 2.7 |     |     |     |

|        |         |     |     |     |     |     |     |
|--------|---------|-----|-----|-----|-----|-----|-----|
| 269334 | 5712684 | 4.5 | 3.7 | 2.4 |     |     |     |
| 269334 | 5712684 | 4.0 | 3.5 | 2.8 |     |     |     |
| 269334 | 5712684 | 4.2 | 2.9 | 3.1 |     |     |     |
| 269334 | 5712684 | 4.7 | 3.0 | 2.1 |     |     |     |
| 269334 | 5712684 | 4.3 | 2.5 | 2.7 |     |     |     |
| 269334 | 5712684 | 4.2 | 3.6 | 1.2 |     |     |     |
| 269334 | 5712684 | 3.9 | 2.9 | 1.6 |     |     |     |
| 269334 | 5712684 | 3.5 | 2.4 | 1.9 |     |     |     |
| 269342 | 5713103 | 6.7 | 4.2 | 2.8 | 4.9 | 3.7 | 2.9 |
| 269342 | 5713103 | 5.3 | 3.6 | 4.7 |     |     |     |
| 269342 | 5713103 | 5.5 | 4.3 | 3.2 |     |     |     |
| 269342 | 5713103 | 5.4 | 4.4 | 3.0 |     |     |     |
| 269342 | 5713103 | 5.5 | 4.2 | 2.7 |     |     |     |
| 269342 | 5713103 | 6.3 | 4.0 | 2.0 |     |     |     |
| 269342 | 5713103 | 5.0 | 4.2 | 2.8 |     |     |     |
| 269342 | 5713103 | 4.7 | 3.6 | 3.2 |     |     |     |
| 269342 | 5713103 | 5.2 | 3.0 | 3.2 |     |     |     |
| 269342 | 5713103 | 4.0 | 3.8 | 3.3 |     |     |     |
| 269342 | 5713103 | 4.0 | 3.2 | 3.4 |     |     |     |
| 269342 | 5713103 | 5.0 | 3.0 | 2.4 |     |     |     |
| 269342 | 5713103 | 3.3 | 3.4 | 3.6 |     |     |     |
| 269342 | 5713103 | 4.0 | 2.9 | 2.0 |     |     |     |
| 269342 | 5713103 | 3.2 | 3.5 | 1.8 |     |     |     |
| 269367 | 5713965 | 2.1 | 0.9 | 0.9 | 2.5 | 1.5 | 1.0 |
| 269367 | 5713965 | 1.8 | 1.3 | 0.5 |     |     |     |
| 269367 | 5713965 | 2.1 | 1   | 0.8 |     |     |     |
| 269367 | 5713965 | 2.4 | 1   | 0.7 |     |     |     |
| 269367 | 5713965 | 2   | 1   | 0.8 |     |     |     |
| 269367 | 5713965 | 2   | 1.8 | 0.9 |     |     |     |
| 269368 | 5713979 | 3.5 | 2.5 | 1.5 |     |     |     |
| 269368 | 5713979 | 2.5 | 1.5 | 1.2 |     |     |     |
| 269368 | 5713979 | 3   | 2   | 1.5 |     |     |     |

|        |         |     |     |     |     |     |     |
|--------|---------|-----|-----|-----|-----|-----|-----|
| 269368 | 5713979 | 2   | 1.5 | 1   |     |     |     |
| 269368 | 5713979 | 3   | 1.5 | 1   |     |     |     |
| 269368 | 5713979 | 3   | 1.8 | 1.2 |     |     |     |
| 269373 | 5713613 | 3.6 | 2.4 | 1.5 | 2.4 | 1.9 | 1.1 |
| 269373 | 5713613 | 2.6 | 2.4 | 2.2 |     |     |     |
| 269374 | 5713622 | 3.5 | 2.5 | 1   |     |     |     |
| 269374 | 5713622 | 2   | 1.5 | 0.5 |     |     |     |
| 269374 | 5713622 | 2.4 | 1   | 0.8 |     |     |     |
| 269374 | 5713622 | 3.7 | 2.8 | 0.9 |     |     |     |
| 269374 | 5713622 | 1.4 | 1.4 | 1   |     |     |     |
| 269374 | 5713622 | 2.2 | 2.1 | 1.4 |     |     |     |
| 269374 | 5713622 | 1.9 | 1.3 | 0.8 |     |     |     |
| 269374 | 5713622 | 1.8 | 1.4 | 0.9 |     |     |     |
| 269374 | 5713622 | 2   | 2   | 1.2 |     |     |     |
| 269374 | 5713622 | 2   | 1.7 | 1.1 |     |     |     |
| 269439 | 5711714 | 3.3 | 2.5 | 1.9 | 3.2 | 2.3 | 1.5 |
| 269439 | 5711714 | 2.8 | 1.8 | 1   |     |     |     |
| 269439 | 5711714 | 2.3 | 1.8 | 0.7 |     |     |     |
| 269439 | 5711714 | 4.8 | 3.3 | 2   |     |     |     |
| 269439 | 5711714 | 3.9 | 2.6 | 1.8 |     |     |     |
| 269439 | 5711714 | 3.3 | 2.8 | 0.8 |     |     |     |
| 269439 | 5711714 | 4.2 | 3   | 2   |     |     |     |
| 269439 | 5711714 | 2   | 1.7 | 0.8 |     |     |     |
| 269439 | 5711714 | 2   | 1.7 | 0.7 |     |     |     |
| 269439 | 5711714 | 2.1 | 1.3 | 1.2 |     |     |     |
| 269439 | 5711714 | 1.7 | 1.4 | 0.7 |     |     |     |
| 269439 | 5711714 | 2   | 1   | 1   |     |     |     |
| 269439 | 5711714 | 6.3 | 3   | 1.8 |     |     |     |
| 269439 | 5711714 | 4.8 | 3.2 | 2.7 |     |     |     |
| 269439 | 5711714 | 3.9 | 2.9 | 2.3 |     |     |     |
| 269439 | 5711714 | 2.9 | 2.3 | 1.5 |     |     |     |
| 269439 | 5711714 | 3   | 2.5 | 2.3 |     |     |     |

|        |         |     |     |     |     |     |     |
|--------|---------|-----|-----|-----|-----|-----|-----|
| 269439 | 5711714 | 2.4 | 2   | 2   |     |     |     |
| 269457 | 5713012 | 2.8 | 1.6 | 1.2 | 2.2 | 1.3 | 1.0 |
| 269457 | 5713012 | 2.5 | 1.5 | 1.3 |     |     |     |
| 269457 | 5713012 | 2.5 | 1   | 0.8 |     |     |     |
| 269457 | 5713012 | 1.3 | 1   | 0.8 |     |     |     |
| 269457 | 5713012 | 1.5 | 1.3 | 1   |     |     |     |
| 269457 | 5713012 | 2   | 1   | 0.8 |     |     |     |
| 269457 | 5713012 | 3   | 1.7 | 1   |     |     |     |
| 269457 | 5713012 | 3   | 2   | 1.3 |     |     |     |
| 269457 | 5713012 | 1.5 | 1   | 0.8 |     |     |     |
| 269457 | 5713012 | 2   | 1   | 0.8 |     |     |     |
| 269457 | 5713012 | 2.4 | 1   | 1   |     |     |     |
| 269457 | 5713012 | 2   | 1.5 | 0.9 |     |     |     |
| 269630 | 5713977 | 4.8 | 3.4 | 2   | 2.5 | 1.6 | 0.9 |
| 269630 | 5713977 | 3.5 | 2   | 1.3 |     |     |     |
| 269636 | 5713969 | 1.9 | 1.7 | 0.9 |     |     |     |
| 269636 | 5713969 | 1.4 | 0.9 | 0.5 |     |     |     |
| 269636 | 5713969 | 1.6 | 0.8 | 0.6 |     |     |     |
| 269636 | 5713969 | 1.5 | 0.9 | 0.6 |     |     |     |
| 269636 | 5713969 | 2.5 | 1.7 | 0.4 |     |     |     |
| 269636 | 5713969 | 2   | 1.5 | 0.7 |     |     |     |
| 269636 | 5713969 | 3   | 2.2 | 1   |     |     |     |
| 269636 | 5713969 | 2.5 | 2   | 1   |     |     |     |
| 269636 | 5713969 | 3.2 | 0.6 | 0.5 |     |     |     |
| 269728 | 5712967 | 4   | 2.5 | 2   | 2.7 | 1.8 | 1.3 |
| 269728 | 5712967 | 2.4 | 2   | 1   |     |     |     |
| 269728 | 5712967 | 3   | 1.8 | 1.5 |     |     |     |
| 269728 | 5712967 | 3.5 | 2.5 | 2   |     |     |     |
| 269728 | 5712967 | 3.5 | 2   | 1.5 |     |     |     |
| 269728 | 5712967 | 1.5 | 1.5 | 0.8 |     |     |     |
| 269728 | 5712967 | 3   | 2   | 1.5 |     |     |     |



|        |         |     |     |     |     |     |     |
|--------|---------|-----|-----|-----|-----|-----|-----|
| 269728 | 5712967 | 2.2 | 1.6 | 1   |     |     |     |
| 269728 | 5712967 | 2   | 1.5 | 0.8 |     |     |     |
| 269728 | 5712967 | 3   | 2   | 1.2 |     |     |     |
| 269728 | 5712967 | 2.5 | 1.5 | 1   |     |     |     |
| 269728 | 5712967 | 2   | 1   | 1   |     |     |     |
| 269734 | 5712110 | 3   | 1.6 | 0.8 | 2.4 | 1.6 | 0.7 |
| 269734 | 5712110 | 3   | 2   | 0.6 |     |     |     |
| 269734 | 5712110 | 3   | 2.5 | 1   |     |     |     |
| 269734 | 5712110 | 2   | 1   | 0.4 |     |     |     |
| 269734 | 5712110 | 3   | 1.2 | 0.8 |     |     |     |
| 269734 | 5712110 | 2.9 | 2.3 | 0.3 |     |     |     |
| 269734 | 5712110 | 2.6 | 2.2 | 0.6 |     |     |     |
| 269734 | 5712110 | 1.6 | 1.5 | 0.2 |     |     |     |
| 269734 | 5712110 | 1.8 | 1.5 | 1   |     |     |     |
| 269734 | 5712110 | 1.4 | 1.4 | 0.5 |     |     |     |
| 269734 | 5712110 | 2.5 | 1   | 1   |     |     |     |
| 269734 | 5712110 | 1.4 | 1.2 | 0.7 |     |     |     |
| 269827 | 5713004 | 6.2 | 5.0 | 5.7 | 5.4 | 4.4 | 3.3 |
| 269827 | 5713004 | 6.8 | 5.2 | 4.0 |     |     |     |
| 269827 | 5713004 | 6.9 | 5.0 | 3.5 |     |     |     |
| 269827 | 5713004 | 5.0 | 6.3 | 3.7 |     |     |     |
| 269827 | 5713004 | 5.0 | 4.8 | 4.7 |     |     |     |
| 269827 | 5713004 | 6.0 | 4.3 | 3.8 |     |     |     |
| 269827 | 5713004 | 6.6 | 4.4 | 2.7 |     |     |     |
| 269827 | 5713004 | 6.0 | 5.0 | 1.8 |     |     |     |
| 269827 | 5713004 | 5.0 | 4.2 | 3.0 |     |     |     |
| 269827 | 5713004 | 6.0 | 3.8 | 2.0 |     |     |     |
| 269827 | 5713004 | 4.0 | 4.6 | 3.0 |     |     |     |
| 269827 | 5713004 | 4.0 | 3.8 | 3.0 |     |     |     |
| 269827 | 5713004 | 5.0 | 3.5 | 2.2 |     |     |     |
| 269827 | 5713004 | 3.8 | 3.5 | 3.4 |     |     |     |
| 269827 | 5713004 | 4.6 | 2.5 | 3.2 |     |     |     |

|        |         |     |     |     |     |     |     |
|--------|---------|-----|-----|-----|-----|-----|-----|
| 270035 | 5712926 | 1.5 | 1.5 | 1   | 1.5 | 1.3 | 0.9 |
| 270035 | 5712926 | 2   | 1.5 | 1   |     |     |     |
| 270035 | 5712926 | 2.5 | 2   | 1   |     |     |     |
| 270035 | 5712926 | 1.5 | 1.3 | 1   |     |     |     |
| 270035 | 5712926 | 1.1 | 1.1 | 0.8 |     |     |     |
| 270035 | 5712926 | 1   | 1   | 0.8 |     |     |     |
| 270035 | 5712926 | 2.5 | 1.5 | 1   |     |     |     |
| 270035 | 5712926 | 1.1 | 1   | 0.8 |     |     |     |
| 270035 | 5712926 | 1.5 | 1.3 | 1   |     |     |     |
| 270035 | 5712926 | 1.2 | 1.2 | 0.8 |     |     |     |
| 270035 | 5712926 | 1   | 1   | 0.5 |     |     |     |
| 270099 | 5713477 | 2   | 2   | 0.2 | 2.1 | 1.6 | 1.1 |
| 270099 | 5713477 | 2   | 1.5 | 1.1 |     |     |     |
| 270099 | 5713477 | 1.9 | 1.6 | 1   |     |     |     |
| 270099 | 5713477 | 2.5 | 2   | 1.5 |     |     |     |
| 270099 | 5713477 | 2   | 1.3 | 0.9 |     |     |     |
| 270099 | 5713477 | 1.8 | 1.3 | 1.2 |     |     |     |
| 270099 | 5713477 | 1.8 | 1.1 | 0.9 |     |     |     |
| 270099 | 5713477 | 2.8 | 2.1 | 1.8 |     |     |     |
| 270099 | 5713477 | 1.9 | 1   | 0.8 |     |     |     |
| 270099 | 5713477 | 2   | 1   | 0.8 |     |     |     |
| 270099 | 5713477 | 2.1 | 1.7 | 1.3 |     |     |     |
| 270099 | 5713477 | 2.4 | 2   | 1.7 |     |     |     |
| 270182 | 5712432 | 4   | 2   | 1   | 3.2 | 1.9 | 1.1 |
| 270182 | 5712432 | 2.5 | 2   | 1.5 |     |     |     |
| 270182 | 5712432 | 3   | 2.2 | 1   |     |     |     |
| 270182 | 5712432 | 3.2 | 2   | 1.5 |     |     |     |
| 270182 | 5712432 | 3   | 2.5 | 1   |     |     |     |
| 270182 | 5712432 | 3   | 1.6 | 1   |     |     |     |
| 270182 | 5712432 | 3.2 | 2.2 | 1   |     |     |     |
| 270182 | 5712432 | 4   | 2   | 1   |     |     |     |

|        |         |     |     |     |     |     |     |
|--------|---------|-----|-----|-----|-----|-----|-----|
| 270182 | 5712432 | 3   | 1.5 | 1   |     |     |     |
| 270182 | 5712432 | 3.5 | 2   | 1   |     |     |     |
| 270182 | 5712432 | 3   | 1.6 | 1   |     |     |     |
| 270182 | 5712432 | 2.5 | 1.5 | 1   |     |     |     |
| 270185 | 5713957 | 2.4 | 1.2 | 0.6 | 2.7 | 1.6 | 1.1 |
| 270185 | 5713957 | 1.9 | 1.3 | 1.1 |     |     |     |
| 270185 | 5713957 | 1.6 | 1.3 | 0.7 |     |     |     |
| 270185 | 5713957 | 3   | 2.5 | 1.5 |     |     |     |
| 270185 | 5713957 | 2.5 | 1.5 | 1   |     |     |     |
| 270185 | 5713957 | 2.2 | 1.6 | 1   |     |     |     |
| 270195 | 5713958 | 4   | 2   | 1.5 |     |     |     |
| 270195 | 5713958 | 2   | 2   | 1   |     |     |     |
| 270195 | 5713958 | 2   | 1   | 0.5 |     |     |     |
| 270195 | 5713958 | 3.5 | 1   | 1   |     |     |     |
| 270195 | 5713958 | 2   | 2   | 1   |     |     |     |
| 270195 | 5713958 | 3.7 | 2   | 1.5 |     |     |     |
| 270195 | 5713958 | 4   | 2   | 1.3 |     |     |     |
| 270233 | 5711743 | 1.7 | 1.2 | 0.6 | 2.2 | 1.4 | 0.7 |
| 270233 | 5711743 | 2.5 | 1.5 | 1   |     |     |     |
| 270233 | 5711743 | 2.5 | 2   | 1   |     |     |     |
| 270233 | 5711743 | 2.2 | 0.5 | 0.5 |     |     |     |
| 270233 | 5711743 | 2.5 | 2   | 0.6 |     |     |     |
| 270233 | 5711743 | 2   | 1   | 0.5 |     |     |     |
| 270233 | 5711743 | 2.2 | 1   | 1   |     |     |     |
| 270233 | 5711743 | 2.4 | 1.4 | 0.8 |     |     |     |
| 270233 | 5711743 | 2   | 1.2 | 0.6 |     |     |     |
| 270233 | 5711743 | 1.4 | 1   | 0.4 |     |     |     |
| 270233 | 5711743 | 3.5 | 2.4 | 0.5 |     |     |     |
| 270233 | 5711743 | 1.5 | 1   | 0.3 |     |     |     |
| 270394 | 5712910 | 2.5 | 1   | 0.7 | 2.7 | 1.7 | 1.1 |
| 270394 | 5712910 | 3.5 | 2.5 | 1   |     |     |     |

|        |         |     |     |     |     |     |     |
|--------|---------|-----|-----|-----|-----|-----|-----|
| 270394 | 5712910 | 3   | 1   | 1   |     |     |     |
| 270394 | 5712910 | 2   | 1   | 0.9 |     |     |     |
| 270394 | 5712910 | 2   | 1.5 | 1   |     |     |     |
| 270394 | 5712910 | 2   | 1.5 | 1   |     |     |     |
| 270394 | 5712910 | 3   | 2   | 1   |     |     |     |
| 270394 | 5712910 | 2.5 | 2   | 1   |     |     |     |
| 270394 | 5712910 | 4   | 3   | 2   |     |     |     |
| 270394 | 5712910 | 2   | 1.5 | 1   |     |     |     |
| 270394 | 5712910 | 4   | 2   | 1.5 |     |     |     |
| 270394 | 5712910 | 1.5 | 1.5 | 1   |     |     |     |
|        |         |     |     |     |     |     |     |
| 270423 | 5712432 | 5.5 | 4   | 2   | 4.0 | 2.8 | 1.4 |
| 270423 | 5712432 | 4   | 2.5 | 1   |     |     |     |
| 270423 | 5712432 | 3.5 | 3.5 | 1.5 |     |     |     |
| 270423 | 5712432 | 4   | 3   | 1   |     |     |     |
| 270423 | 5712432 | 4   | 3.8 | 2   |     |     |     |
| 270423 | 5712432 | 3.5 | 3   | 1   |     |     |     |
| 270423 | 5712432 | 5   | 3   | 2   |     |     |     |
| 270423 | 5712432 | 4   | 2   | 2   |     |     |     |
| 270423 | 5712432 | 4   | 2   | 1.5 |     |     |     |
| 270423 | 5712432 | 4   | 2   | 1   |     |     |     |
| 270423 | 5712432 | 3   | 2   | 1   |     |     |     |
| 270423 | 5712432 | 3   | 2.5 | 1   |     |     |     |
|        |         |     |     |     |     |     |     |
| 270438 | 5714593 | 6   | 2   | 1   | 3.4 | 2.1 | 1.0 |
| 270438 | 5714593 | 4   | 3   | 0.6 |     |     |     |
| 270438 | 5714593 | 3   | 2   | 1   |     |     |     |
| 270438 | 5714593 | 3   | 2   | 1   |     |     |     |
| 270438 | 5714593 | 3   | 1.5 | 0.8 |     |     |     |
| 270438 | 5714593 | 2   | 1.5 | 1.5 |     |     |     |
| 270438 | 5714593 | 4   | 3   | 1   |     |     |     |
| 270438 | 5714593 | 3   | 2   | 1   |     |     |     |
| 270438 | 5714593 | 3   | 2   | 1   |     |     |     |
| 270438 | 5714593 | 3   | 2   | 1   |     |     |     |

|        |         |     |     |     |     |     |     |
|--------|---------|-----|-----|-----|-----|-----|-----|
| 270438 | 5714593 | 4   | 1.6 | 0.8 |     |     |     |
| 270438 | 5714593 | 3   | 2   | 0.8 |     |     |     |
| 270573 | 5714484 | 3   | 1.5 | 0.8 | 3.9 | 1.9 | 1.0 |
| 270573 | 5714484 | 2.5 | 2   | 1   |     |     |     |
| 270573 | 5714484 | 6.5 | 3   | 1   |     |     |     |
| 270573 | 5714484 | 5.2 | 1.5 | 1   |     |     |     |
| 270573 | 5714484 | 4   | 2   | 1.5 |     |     |     |
| 270573 | 5714484 | 3   | 1.5 | 0.8 |     |     |     |
| 270573 | 5714484 | 3   | 2   | 0.8 |     |     |     |
| 270573 | 5714484 | 4   | 2   | 1   |     |     |     |
| 270573 | 5714484 | 3   | 2   | 1   |     |     |     |
| 270573 | 5714484 | 4   | 1.3 | 1   |     |     |     |
| 270573 | 5714484 | 4   | 2   | 1.2 |     |     |     |
| 270573 | 5714484 | 4   | 2   | 0.8 |     |     |     |
| 270577 | 5711305 | 3.9 | 2   | 0.8 | 3.4 | 1.9 | 0.7 |
| 270577 | 5711305 | 2.6 | 2.5 | 0.7 |     |     |     |
| 270577 | 5711305 | 3.4 | 2.5 | 0.8 |     |     |     |
| 270577 | 5711305 | 3.4 | 1.1 | 0.3 |     |     |     |
| 270577 | 5711305 | 3.6 | 0.6 | 0.6 |     |     |     |
| 270577 | 5711305 | 3.5 | 2.9 | 1   |     |     |     |
| 270585 | 5714725 | 4   | 2   | 1   | 4.0 | 2.3 | 1.1 |
| 270585 | 5714725 | 5   | 1.5 | 1   |     |     |     |
| 270585 | 5714725 | 3.5 | 3.5 | 1   |     |     |     |
| 270585 | 5714725 | 4.5 | 2   | 1   |     |     |     |
| 270585 | 5714725 | 3   | 2.5 | 1   |     |     |     |
| 270585 | 5714725 | 4   | 2   | 1   |     |     |     |
| 270585 | 5714725 | 4   | 2.5 | 1   |     |     |     |
| 270585 | 5714725 | 4   | 2.5 | 1.5 |     |     |     |
| 270585 | 5714725 | 5.5 | 2   | 1.5 |     |     |     |
| 270585 | 5714725 | 3.5 | 3   | 1   |     |     |     |
| 270585 | 5714725 | 4   | 2   | 1.5 |     |     |     |

|        |         |     |     |     |     |     |     |
|--------|---------|-----|-----|-----|-----|-----|-----|
| 270585 | 5714725 | 3   | 2   | 1   |     |     |     |
| 270653 | 5712937 | 6.8 | 5.6 | 4.7 | 4.8 | 4.0 | 3.1 |
| 270653 | 5712937 | 5.1 | 5.4 | 4.5 |     |     |     |
| 270653 | 5712937 | 5.8 | 3.9 | 4.0 |     |     |     |
| 270653 | 5712937 | 4.7 | 4.0 | 4.6 |     |     |     |
| 270653 | 5712937 | 5.0 | 4.5 | 3.7 |     |     |     |
| 270653 | 5712937 | 5.4 | 4.7 | 2.5 |     |     |     |
| 270653 | 5712937 | 4.5 | 3.5 | 4.0 |     |     |     |
| 270653 | 5712937 | 5.1 | 4.7 | 2.0 |     |     |     |
| 270653 | 5712937 | 4.9 | 3.4 | 3.0 |     |     |     |
| 270653 | 5712937 | 5.2 | 4.0 | 2.0 |     |     |     |
| 270653 | 5712937 | 5.2 | 4.0 | 1.8 |     |     |     |
| 270653 | 5712937 | 4.0 | 2.7 | 3.4 |     |     |     |
| 270653 | 5712937 | 3.4 | 3.6 | 2.9 |     |     |     |
| 270653 | 5712937 | 3.9 | 3.0 | 2.9 |     |     |     |
| 270653 | 5712937 | 4.2 | 4.2 | 1.0 |     |     |     |
| 270653 | 5712937 | 3.5 | 3.0 | 2.5 |     |     |     |
| 270658 | 5712266 | 3   | 1.8 | 1.3 | 3.5 | 2.3 | 1.1 |
| 270658 | 5712266 | 5   | 3   | 2   |     |     |     |
| 270658 | 5712266 | 3.5 | 2   | 0.8 |     |     |     |
| 270658 | 5712266 | 3.5 | 2.5 | 1   |     |     |     |
| 270658 | 5712266 | 4   | 2   | 1   |     |     |     |
| 270658 | 5712266 | 3.5 | 2   | 1.5 |     |     |     |
| 270658 | 5712266 | 3.5 | 2.5 | 1   |     |     |     |
| 270658 | 5712266 | 4   | 3   | 1   |     |     |     |
| 270658 | 5712266 | 3   | 3   | 1   |     |     |     |
| 270658 | 5712266 | 3   | 2   | 1   |     |     |     |
| 270658 | 5712266 | 3   | 2   | 1   |     |     |     |
| 270658 | 5712266 | 3   | 2   | 0.8 |     |     |     |
| 270668 | 5713960 | 2   | 1.8 | 1.1 | 2.4 | 1.6 | 1.0 |
| 270668 | 5713960 | 2.2 | 1.7 | 1   |     |     |     |

|        |         |     |     |     |     |     |     |
|--------|---------|-----|-----|-----|-----|-----|-----|
| 270668 | 5713960 | 1.7 | 1   | 0.9 |     |     |     |
| 270668 | 5713960 | 3.1 | 3   | 1   |     |     |     |
| 270668 | 5713960 | 3   | 2.3 | 1.5 |     |     |     |
| 270668 | 5713960 | 3.4 | 0.9 | 0.5 |     |     |     |
| 270668 | 5713960 | 2.4 | 1.3 | 0.7 |     |     |     |
| 270668 | 5713960 | 2   | 1.7 | 1.1 |     |     |     |
| 270668 | 5713960 | 3   | 2.5 | 2   |     |     |     |
| 270693 | 5713963 | 1.8 | 0.9 | 0.2 |     |     |     |
| 270693 | 5713963 | 2   | 1.6 | 1   |     |     |     |
| 270693 | 5713963 | 1.8 | 1.5 | 1   |     |     |     |
| 270693 | 5713963 | 2.2 | 1   | 0.9 |     |     |     |
|        |         |     |     |     |     |     |     |
| 270742 | 5711658 | 3.5 | 1.5 | 1.5 | 2.3 | 1.5 | 0.7 |
| 270742 | 5711658 | 3.4 | 1   | 0.4 |     |     |     |
| 270742 | 5711658 | 3   | 2   | 1   |     |     |     |
| 270742 | 5711658 | 2.7 | 2   | 0.4 |     |     |     |
| 270742 | 5711658 | 2.5 | 1.8 | 1   |     |     |     |
| 270742 | 5711658 | 1.8 | 1.5 | 0.4 |     |     |     |
| 270742 | 5711658 | 2   | 1.5 | 0.4 |     |     |     |
| 270742 | 5711658 | 2   | 1.5 | 1   |     |     |     |
| 270742 | 5711658 | 2   | 1.2 | 0.5 |     |     |     |
| 270742 | 5711658 | 1.5 | 1.2 | 0.8 |     |     |     |
| 270742 | 5711658 | 1.8 | 1.4 | 0.6 |     |     |     |
| 270742 | 5711658 | 1.9 | 1.4 | 0.3 |     |     |     |
|        |         |     |     |     |     |     |     |
| 270840 | 5714316 | 3   | 3   | 1   | 2.7 | 1.7 | 1.0 |
| 270840 | 5714316 | 2.5 | 1.5 | 1.5 |     |     |     |
| 270840 | 5714316 | 3   | 2   | 1   |     |     |     |
| 270840 | 5714316 | 2   | 2   | 1   |     |     |     |
| 270840 | 5714316 | 3   | 0.9 | 0.5 |     |     |     |
| 270840 | 5714316 | 2.5 | 1.5 | 1   |     |     |     |
| 270840 | 5714316 | 3   | 3   | 1   |     |     |     |
| 270840 | 5714316 | 3.5 | 1.5 | 0.5 |     |     |     |
| 270840 | 5714316 | 4   | 1   | 1   |     |     |     |



|        |         |     |     |     |     |     |     |
|--------|---------|-----|-----|-----|-----|-----|-----|
| 270840 | 5714316 | 2   | 1   | 1   |     |     |     |
| 270840 | 5714316 | 2   | 1.6 | 1.5 |     |     |     |
| 270840 | 5714316 | 2   | 1   | 1   |     |     |     |
| 270854 | 5713260 | 5.2 | 1.2 | 0.9 | 2.9 | 1.5 | 1.0 |
| 270854 | 5713260 | 3.5 | 1.2 | 1.1 |     |     |     |
| 270854 | 5713260 | 3.4 | 2.6 | 1.6 |     |     |     |
| 270854 | 5713260 | 3   | 2   | 0.5 |     |     |     |
| 270854 | 5713260 | 2.2 | 1   | 0.5 |     |     |     |
| 270854 | 5713260 | 2.3 | 1   | 0.4 |     |     |     |
| 270854 | 5713260 | 2.4 | 1.9 | 1.5 |     |     |     |
| 270854 | 5713260 | 2.2 | 1.2 | 0.7 |     |     |     |
| 270854 | 5713260 | 1.1 | 0.9 | 0.7 |     |     |     |
| 270854 | 5713260 | 2.5 | 1.7 | 1.5 |     |     |     |
| 270854 | 5713260 | 4.3 | 2   | 1.7 |     |     |     |
| 270854 | 5713260 | 3   | 1.8 | 0.9 |     |     |     |
| 270873 | 5712882 | 3.5 | 2.5 | 1   | 2.5 | 1.5 | 0.9 |
| 270873 | 5712882 | 2   | 1   | 0.8 |     |     |     |
| 270873 | 5712882 | 3   | 1.5 | 1   |     |     |     |
| 270873 | 5712882 | 2   | 1.5 | 1   |     |     |     |
| 270873 | 5712882 | 3   | 2.5 | 1   |     |     |     |
| 270873 | 5712882 | 2   | 1   | 0.9 |     |     |     |
| 270873 | 5712882 | 2   | 1   | 0.8 |     |     |     |
| 270873 | 5712882 | 2   | 1   | 0.5 |     |     |     |
| 270873 | 5712882 | 2.5 | 1.5 | 1   |     |     |     |
| 270873 | 5712882 | 2   | 1.5 | 1   |     |     |     |
| 270873 | 5712882 | 3.5 | 1.5 | 1   |     |     |     |
| 270873 | 5712882 | 2   | 1.5 | 1   |     |     |     |
| 270883 | 5712042 | 3.8 | 2.2 | 0.8 | 3.2 | 2.2 | 1.0 |
| 270883 | 5712042 | 3   | 2   | 0.5 |     |     |     |
| 270883 | 5712042 | 3   | 2.5 | 1   |     |     |     |
| 270883 | 5712042 | 2.5 | 2   | 1   |     |     |     |

|        |         |     |     |     |     |     |     |
|--------|---------|-----|-----|-----|-----|-----|-----|
| 270883 | 5712042 | 3.5 | 2.5 | 0.5 |     |     |     |
| 270883 | 5712042 | 3   | 2.5 | 1.5 |     |     |     |
| 270883 | 5712042 | 3   | 2   | 1.5 |     |     |     |
| 270883 | 5712042 | 4   | 2.2 | 1   |     |     |     |
| 270883 | 5712042 | 3.4 | 2   | 0.8 |     |     |     |
| 270883 | 5712042 | 3   | 2   | 1   |     |     |     |
| 270883 | 5712042 | 3   | 2   | 1.2 |     |     |     |
| 270883 | 5712042 | 3   | 2   | 1   |     |     |     |
| 270920 | 5714758 | 7   | 2.5 | 1   | 4.5 | 2.3 | 1.1 |
| 270920 | 5714758 | 4.5 | 2   | 1   |     |     |     |
| 270920 | 5714758 | 4.5 | 2.5 | 1   |     |     |     |
| 270920 | 5714758 | 4.5 | 1   | 1   |     |     |     |
| 270920 | 5714758 | 4   | 2.5 | 1.3 |     |     |     |
| 270920 | 5714758 | 4   | 3   | 0.8 |     |     |     |
| 270920 | 5714758 | 5.5 | 2.5 | 1.5 |     |     |     |
| 270920 | 5714758 | 4.5 | 4   | 1.5 |     |     |     |
| 270920 | 5714758 | 4   | 2   | 1   |     |     |     |
| 270920 | 5714758 | 4   | 2   | 1.3 |     |     |     |
| 270920 | 5714758 | 4   | 2.5 | 0.8 |     |     |     |
| 270920 | 5714758 | 3.2 | 1   | 0.9 |     |     |     |
| 271067 | 5714345 | 3   | 2.5 | 1.5 | 2.8 | 1.7 | 1.0 |
| 271067 | 5714345 | 3   | 1.5 | 1   |     |     |     |
| 271067 | 5714345 | 3   | 0.8 | 0.5 |     |     |     |
| 271067 | 5714345 | 2.5 | 2   | 1   |     |     |     |
| 271067 | 5714345 | 2   | 1   | 0.5 |     |     |     |
| 271067 | 5714345 | 2   | 2   | 1.5 |     |     |     |
| 271067 | 5714345 | 4   | 2.6 | 1.5 |     |     |     |
| 271067 | 5714345 | 3.2 | 2   | 1   |     |     |     |
| 271067 | 5714345 | 2.5 | 1   | 1   |     |     |     |
| 271067 | 5714345 | 3.5 | 1.5 | 1   |     |     |     |
| 271067 | 5714345 | 3   | 2   | 1   |     |     |     |
| 271067 | 5714345 | 2   | 1   | 0.5 |     |     |     |

|        |         |     |     |     |     |     |     |
|--------|---------|-----|-----|-----|-----|-----|-----|
| 271084 | 5713646 | 5.2 | 4.6 | 3.4 | 4.7 | 3.8 | 2.6 |
| 271084 | 5713646 | 5.0 | 4.6 | 3.6 |     |     |     |
| 271084 | 5713646 | 5.9 | 4.5 | 2.6 |     |     |     |
| 271084 | 5713646 | 5.2 | 4.5 | 2.8 |     |     |     |
| 271084 | 5713646 | 5.2 | 5.0 | 2.1 |     |     |     |
| 271084 | 5713646 | 4.6 | 4.0 | 3.3 |     |     |     |
| 271084 | 5713646 | 5.3 | 3.6 | 2.7 |     |     |     |
| 271084 | 5713646 | 4.8 | 3.7 | 2.9 |     |     |     |
| 271084 | 5713646 | 5.0 | 2.7 | 3.0 |     |     |     |
| 271084 | 5713646 | 4.6 | 4.2 | 1.8 |     |     |     |
| 271084 | 5713646 | 4.3 | 3.8 | 2.4 |     |     |     |
| 271084 | 5713646 | 3.8 | 3.3 | 2.6 |     |     |     |
| 271084 | 5713646 | 4.0 | 3.4 | 2.2 |     |     |     |
| 271084 | 5713646 | 3.6 | 2.7 | 2.1 |     |     |     |
| 271084 | 5713646 | 3.9 | 2.9 | 1.4 |     |     |     |
| 271115 | 5711857 | 4.5 | 2   | 1   | 3.1 | 2.0 | 0.9 |
| 271115 | 5711857 | 2.5 | 1.8 | 0.9 |     |     |     |
| 271115 | 5711857 | 3.5 | 2.6 | 1.5 |     |     |     |
| 271115 | 5711857 | 3   | 2   | 0.6 |     |     |     |
| 271115 | 5711857 | 3.3 | 2   | 0.5 |     |     |     |
| 271115 | 5711857 | 2.5 | 2   | 0.5 |     |     |     |
| 271115 | 5711857 | 2.6 | 2.4 | 1.2 |     |     |     |
| 271115 | 5711857 | 3.5 | 1.5 | 0.8 |     |     |     |
| 271115 | 5711857 | 3.5 | 2   | 1   |     |     |     |
| 271115 | 5711857 | 3   | 2.2 | 1.2 |     |     |     |
| 271115 | 5711857 | 2.5 | 1.6 | 0.8 |     |     |     |
| 271115 | 5711857 | 3   | 2.4 | 0.6 |     |     |     |
| 271199 | 5714002 | 1.5 | 1   | 0.8 | 2.0 | 1.2 | 0.7 |
| 271199 | 5714002 | 2.5 | 1.2 | 0.5 |     |     |     |
| 271199 | 5714002 | 1.8 | 1   | 0.5 |     |     |     |
| 271199 | 5714002 | 2   | 1.5 | 1   |     |     |     |

|        |         |     |     |     |     |     |     |
|--------|---------|-----|-----|-----|-----|-----|-----|
| 271200 | 5713997 | 1.5 | 0.9 | 0.7 | 2.3 | 1.5 | 1.0 |
| 271200 | 5713997 | 2.5 | 0.7 | 0.6 |     |     |     |
| 271200 | 5713997 | 1.7 | 0.8 | 0.7 |     |     |     |
| 271200 | 5713997 | 1.4 | 1.3 | 0.4 |     |     |     |
| 271200 | 5713997 | 3.5 | 2.5 | 2   |     |     |     |
| 271200 | 5713997 | 2.8 | 2.4 | 1.7 |     |     |     |
| 271200 | 5713997 | 2.3 | 1.4 | 1   |     |     |     |
| 271200 | 5713997 | 2.6 | 1.6 | 0.9 |     |     |     |
| 271206 | 5714743 | 7.5 | 4   | 1   | 4.1 | 2.1 | 1.1 |
| 271206 | 5714743 | 4   | 2   | 1   |     |     |     |
| 271206 | 5714743 | 3.5 | 2   | 1   |     |     |     |
| 271206 | 5714743 | 3.2 | 2.5 | 1   |     |     |     |
| 271206 | 5714743 | 3.2 | 2.5 | 1.2 |     |     |     |
| 271206 | 5714743 | 4   | 1   | 0.6 |     |     |     |
| 271206 | 5714743 | 4.5 | 2.5 | 2   |     |     |     |
| 271206 | 5714743 | 4   | 2   | 1   |     |     |     |
| 271206 | 5714743 | 3.5 | 2   | 0.8 |     |     |     |
| 271206 | 5714743 | 3   | 2   | 1   |     |     |     |
| 271206 | 5714743 | 4.5 | 1   | 1   |     |     |     |
| 271206 | 5714743 | 4   | 2   | 1   |     |     |     |
| 271236 | 5711558 | 3.7 | 2   | 1.5 | 2.3 | 1.5 | 0.8 |
| 271236 | 5711558 | 2.5 | 2   | 1.5 |     |     |     |
| 271236 | 5711558 | 1.5 | 1.5 | 0.8 |     |     |     |
| 271236 | 5711558 | 2   | 1.6 | 0.7 |     |     |     |
| 271236 | 5711558 | 2   | 1   | 0.5 |     |     |     |
| 271236 | 5711558 | 3   | 1.7 | 1   |     |     |     |
| 271236 | 5711558 | 3.5 | 1.8 | 1   |     |     |     |
| 271236 | 5711558 | 2   | 1.5 | 0.8 |     |     |     |
| 271236 | 5711558 | 1.7 | 1.5 | 0.5 |     |     |     |
| 271236 | 5711558 | 1.5 | 0.8 | 0.5 |     |     |     |
| 271236 | 5711558 | 2.5 | 1.5 | 0.5 |     |     |     |

|        |         |     |     |     |     |     |     |
|--------|---------|-----|-----|-----|-----|-----|-----|
| 271236 | 5711558 | 2   | 1   | 0.5 |     |     |     |
| 271237 | 5712325 | 7.0 | 4.3 | 3.2 | 5.0 | 3.9 | 2.7 |
| 271237 | 5712325 | 5.7 | 5.0 | 3.6 |     |     |     |
| 271237 | 5712325 | 6.7 | 4.5 | 3.0 |     |     |     |
| 271237 | 5712325 | 5.3 | 4.0 | 3.1 |     |     |     |
| 271237 | 5712325 | 4.5 | 4.6 | 3.2 |     |     |     |
| 271237 | 5712325 | 4.5 | 4.0 | 3.4 |     |     |     |
| 271237 | 5712325 | 4.7 | 4.2 | 2.9 |     |     |     |
| 271237 | 5712325 | 6.0 | 3.9 | 1.5 |     |     |     |
| 271237 | 5712325 | 3.9 | 4.2 | 2.7 |     |     |     |
| 271237 | 5712325 | 4.7 | 3.2 | 2.6 |     |     |     |
| 271237 | 5712325 | 4.2 | 3.6 | 2.7 |     |     |     |
| 271237 | 5712325 | 4.7 | 3.2 | 2.4 |     |     |     |
| 271237 | 5712325 | 4.9 | 3.2 | 2.1 |     |     |     |
| 271237 | 5712325 | 3.7 | 4.2 | 2.3 |     |     |     |
| 271237 | 5712325 | 4.9 | 2.9 | 1.8 |     |     |     |
| 271259 | 5712864 | 1.5 | 0.5 | 0.3 | 2.8 | 1.8 | 1.1 |
| 271259 | 5712864 | 3.5 | 3.5 | 2   |     |     |     |
| 271259 | 5712864 | 2   | 2   | 1   |     |     |     |
| 271259 | 5712864 | 2.5 | 2   | 0.8 |     |     |     |
| 271259 | 5712864 | 3   | 1   | 0.8 |     |     |     |
| 271259 | 5712864 | 3   | 1.5 | 1   |     |     |     |
| 271259 | 5712864 | 5   | 2.5 | 2   |     |     |     |
| 271259 | 5712864 | 2   | 1   | 0.8 |     |     |     |
| 271259 | 5712864 | 2.5 | 2   | 1   |     |     |     |
| 271259 | 5712864 | 2.5 | 1.5 | 1   |     |     |     |
| 271259 | 5712864 | 4   | 2   | 1.5 |     |     |     |
| 271259 | 5712864 | 2.5 | 1.5 | 0.9 |     |     |     |
| 271360 | 5714325 | 3.5 | 2   | 1   | 3.4 | 1.9 | 1.1 |
| 271360 | 5714325 | 4   | 2.5 | 2   |     |     |     |
| 271360 | 5714325 | 2.6 | 2   | 1.2 |     |     |     |

|        |         |     |     |     |     |     |     |
|--------|---------|-----|-----|-----|-----|-----|-----|
| 271360 | 5714325 | 4.2 | 2   | 0.8 |     |     |     |
| 271360 | 5714325 | 3   | 2   | 1   |     |     |     |
| 271360 | 5714325 | 3.5 | 1   | 1   |     |     |     |
| 271360 | 5714325 | 3   | 3   | 1.5 |     |     |     |
| 271360 | 5714325 | 3.2 | 2   | 1   |     |     |     |
| 271360 | 5714325 | 3   | 0.6 | 0.6 |     |     |     |
| 271360 | 5714325 | 4   | 2.5 | 1   |     |     |     |
| 271360 | 5714325 | 3.5 | 2   | 1.5 |     |     |     |
| 271360 | 5714325 | 3   | 1   | 1   |     |     |     |
| 271366 | 5711656 | 3.5 | 3   | 0.5 | 3.0 | 2.3 | 1.0 |
| 271366 | 5711656 | 3.3 | 3   | 2   |     |     |     |
| 271366 | 5711656 | 3.5 | 2   | 0.8 |     |     |     |
| 271366 | 5711656 | 3   | 2   | 1   |     |     |     |
| 271366 | 5711656 | 2   | 2   | 0.8 |     |     |     |
| 271366 | 5711656 | 2.5 | 2   | 1   |     |     |     |
| 271375 | 5712877 | 5.8 | 5.0 | 3.9 | 5.6 | 4.3 | 3.3 |
| 271375 | 5712877 | 6.8 | 3.6 | 4.1 |     |     |     |
| 271375 | 5712877 | 6.1 | 4.1 | 4.0 |     |     |     |
| 271375 | 5712877 | 5.3 | 5.0 | 3.9 |     |     |     |
| 271375 | 5712877 | 5.0 | 5.0 | 3.8 |     |     |     |
| 271375 | 5712877 | 6.0 | 3.6 | 4.0 |     |     |     |
| 271375 | 5712877 | 5.1 | 5.0 | 3.4 |     |     |     |
| 271375 | 5712877 | 6.1 | 4.0 | 3.2 |     |     |     |
| 271375 | 5712877 | 5.5 | 4.3 | 2.9 |     |     |     |
| 271375 | 5712877 | 5.8 | 4.0 | 2.6 |     |     |     |
| 271375 | 5712877 | 4.7 | 4.5 | 3.0 |     |     |     |
| 271375 | 5712877 | 5.7 | 4.5 | 2.0 |     |     |     |
| 271375 | 5712877 | 4.7 | 4.2 | 3.2 |     |     |     |
| 271375 | 5712877 | 5.8 | 3.6 | 2.6 |     |     |     |
| 271375 | 5712877 | 5.5 | 4.2 | 2.2 |     |     |     |
| 271430 | 5714766 | 5   | 3.5 | 2   | 3.8 | 2.2 | 1.4 |

|        |         |     |     |     |     |     |     |
|--------|---------|-----|-----|-----|-----|-----|-----|
| 271430 | 5714766 | 7   | 3   | 2   |     |     |     |
| 271430 | 5714766 | 3.5 | 2   | 1   |     |     |     |
| 271430 | 5714766 | 3.5 | 2   | 1.2 |     |     |     |
| 271430 | 5714766 | 3.5 | 2.5 | 1   |     |     |     |
| 271430 | 5714766 | 2.6 | 2   | 1   |     |     |     |
| 271430 | 5714766 | 3.5 | 2.5 | 1.5 |     |     |     |
| 271430 | 5714766 | 3.5 | 2   | 1   |     |     |     |
| 271430 | 5714766 | 3   | 1.5 | 1.5 |     |     |     |
| 271430 | 5714766 | 3.6 | 2   | 2   |     |     |     |
| 271430 | 5714766 | 4   | 1.5 | 1   |     |     |     |
| 271430 | 5714766 | 3   | 1.5 | 1   |     |     |     |
|        |         |     |     |     |     |     |     |
| 271635 | 5711445 | 5   | 2.5 | 2   | 3.3 | 2.1 | 1.2 |
| 271635 | 5711445 | 4   | 2   | 2   |     |     |     |
| 271635 | 5711445 | 4   | 3   | 2   |     |     |     |
| 271635 | 5711445 | 3   | 2   | 1   |     |     |     |
| 271635 | 5711445 | 2.5 | 2.3 | 1.2 |     |     |     |
| 271635 | 5711445 | 3   | 2   | 0.8 |     |     |     |
| 271635 | 5711445 | 2.5 | 1.5 | 1   |     |     |     |
| 271635 | 5711445 | 3   | 1.5 | 0.8 |     |     |     |
| 271635 | 5711445 | 2.5 | 2   | 1   |     |     |     |
| 271635 | 5711445 | 3   | 2.5 | 0.4 |     |     |     |
|        |         |     |     |     |     |     |     |
| 271686 | 5712927 | 4   | 1   | 1   | 2.9 | 1.7 | 1.0 |
| 271686 | 5712927 | 4.5 | 2.5 | 1.5 |     |     |     |
| 271686 | 5712927 | 3   | 2   | 1   |     |     |     |
| 271686 | 5712927 | 2   | 1.5 | 0.8 |     |     |     |
| 271686 | 5712927 | 3   | 1.5 | 0.7 |     |     |     |
| 271686 | 5712927 | 3   | 1.5 | 1   |     |     |     |
| 271686 | 5712927 | 2.5 | 1.5 | 0.8 |     |     |     |
| 271686 | 5712927 | 2   | 1.5 | 1   |     |     |     |
| 271686 | 5712927 | 1.5 | 1.5 | 1   |     |     |     |
| 271686 | 5712927 | 2.5 | 2   | 1.2 |     |     |     |
| 271686 | 5712927 | 2.5 | 1.5 | 1   |     |     |     |



|        |         |                |     |     |     |     |     |
|--------|---------|----------------|-----|-----|-----|-----|-----|
| 271686 | 5712927 | 4              | 2   | 1.2 |     |     |     |
| 271702 | 5714709 | 4              | 3   | 1   | 3.3 | 2.0 | 1.0 |
| 271702 | 5714709 | 3              | 2   | 1.2 |     |     |     |
| 271702 | 5714709 | 4              | 2   | 1   |     |     |     |
| 271702 | 5714709 | 3              | 1.5 | 1   |     |     |     |
| 271702 | 5714709 | 2.6            | 2.5 | 1   |     |     |     |
| 271702 | 5714709 | 3              | 2.8 | 0.9 |     |     |     |
| 271702 | 5714709 | 4              | 2   | 1   |     |     |     |
| 271702 | 5714709 | 4.5            | 2.2 | 1   |     |     |     |
| 271702 | 5714709 | 3.2            | 1.5 | 1   |     |     |     |
| 271702 | 5714709 | 3              | 1.5 | 1.2 |     |     |     |
| 271702 | 5714709 | 3.2            | 1.5 | 0.8 |     |     |     |
| 271702 | 5714709 | 2.5            | 2   | 1   |     |     |     |
| 271797 | 5711737 | 5.7            | 5.2 | 4.8 | 5.4 | 4.0 | 2.9 |
| 271797 | 5711737 | 5.7            | 5.2 | 3.4 |     |     |     |
| 271797 | 5711737 | 5.9            | 4.5 | 3.6 |     |     |     |
| 271797 | 5711737 | 6.1            | 4.2 | 2.8 |     |     |     |
| 271797 | 5711737 | 5.6            | 3.6 | 3.8 |     |     |     |
| 271797 | 5711737 | 5.0            | 3.7 | 3.4 |     |     |     |
| 271797 | 5711737 | 5.2            | 4.3 | 2.4 |     |     |     |
| 271797 | 5711737 | 5.3            | 4.4 | 2.2 |     |     |     |
| 271797 | 5711737 | 6.4            | 2.8 | 2.7 |     |     |     |
| 271797 | 5711737 | 5.6            | 4.0 | 2.1 |     |     |     |
| 271797 | 5711737 | 5.2            | 3.7 | 2.7 |     |     |     |
| 271797 | 5711737 | 4.8            | 3.6 | 2.7 |     |     |     |
| 271797 | 5711737 | 5.0            | 3.4 | 2.6 |     |     |     |
| 271797 | 5711737 | 5.6            | 3.7 | 1.6 |     |     |     |
| 271797 | 5711737 | 4.2            | 3.2 | 2.8 |     |     |     |
| 271835 | 5714019 | first detected |     |     |     |     |     |
| 271885 | 5714568 | 4              | 3   | 1   | 3.6 | 2.0 | 1.1 |

|        |         |     |     |     |     |     |     |
|--------|---------|-----|-----|-----|-----|-----|-----|
| 271885 | 5714568 | 3.2 | 2   | 1   |     |     |     |
| 271885 | 5714568 | 3.5 | 2   | 0.8 |     |     |     |
| 271885 | 5714568 | 4   | 1.5 | 1   |     |     |     |
| 271885 | 5714568 | 4   | 2.2 | 1.5 |     |     |     |
| 271885 | 5714568 | 3   | 1.5 | 1   |     |     |     |
| 271885 | 5714568 | 5   | 2   | 1   |     |     |     |
| 271885 | 5714568 | 4   | 2   | 0.8 |     |     |     |
| 271885 | 5714568 | 3   | 2.5 | 1   |     |     |     |
| 271885 | 5714568 | 3   | 2   | 1.5 |     |     |     |
| 271885 | 5714568 | 3   | 2   | 1   |     |     |     |
| 271885 | 5714568 | 3   | 1.5 | 1   |     |     |     |
| 271903 | 5711298 | 2   | 1   | 0.5 | 2.8 | 1.8 | 0.8 |
| 271903 | 5711298 | 3   | 2.5 | 2   |     |     |     |
| 271903 | 5711298 | 3.5 | 2.5 | 1.5 |     |     |     |
| 271903 | 5711298 | 3   | 1.8 | 1   |     |     |     |
| 271903 | 5711298 | 2.5 | 2   | 1   |     |     |     |
| 271903 | 5711298 | 3   | 2   | 0.5 |     |     |     |
| 271903 | 5711298 | 3.2 | 2   | 0.8 |     |     |     |
| 271903 | 5711298 | 3   | 1.5 | 0.8 |     |     |     |
| 271903 | 5711298 | 4   | 1   | 0.5 |     |     |     |
| 271903 | 5711298 | 2.5 | 1.5 | 0.5 |     |     |     |
| 271903 | 5711298 | 2   | 2   | 0.5 |     |     |     |
| 271903 | 5711298 | 2.5 | 1   | 0.5 |     |     |     |
| 271903 | 5711298 | 2.8 | 2   | 0.6 |     |     |     |
| 271915 | 5713012 | 3.4 | 2.9 | 1.3 | 3.4 | 2.3 | 1.4 |
| 271915 | 5713012 | 2.9 | 2.5 | 1.9 |     |     |     |
| 271915 | 5713012 | 4.5 | 2.5 | 1.3 |     |     |     |
| 271915 | 5713012 | 4.8 | 4.2 | 1.5 |     |     |     |
| 271915 | 5713012 | 2.4 | 2   | 1.7 |     |     |     |
| 271915 | 5713012 | 1.9 | 1.2 | 1.2 |     |     |     |
| 271914 | 5713011 | 3.3 | 2.8 | 1.8 |     |     |     |
| 271914 | 5713011 | 4   | 2   | 0.5 |     |     |     |

|        |         |                 |     |     |     |     |     |
|--------|---------|-----------------|-----|-----|-----|-----|-----|
| 271914 | 5713011 | 3.5             | 2   | 1.5 |     |     |     |
| 271914 | 5713011 | 2.2             | 1.6 | 1   |     |     |     |
| 271914 | 5713011 | 3               | 1.6 | 1.2 |     |     |     |
| 271914 | 5713011 | 4.5             | 2.3 | 1.6 |     |     |     |
| 271962 | 5711120 | southern extent |     |     |     |     |     |
| 271965 | 5711469 | 2.5             | 1.7 | 0.8 | 3.1 | 2.3 | 1.1 |
| 271965 | 5711469 | 1.8             | 1.2 | 0.5 |     |     |     |
| 271965 | 5711469 | 2.3             | 1.8 | 1   |     |     |     |
| 271965 | 5711469 | 1.4             | 1   | 0.7 |     |     |     |
| 271965 | 5711469 | 4.2             | 3.7 | 1.5 |     |     |     |
| 271965 | 5711469 | 5.8             | 3.6 | 1.4 |     |     |     |
| 271965 | 5711469 | 4.1             | 3   | 1.6 |     |     |     |
| 271965 | 5711469 | 5.4             | 4.2 | 1.3 |     |     |     |
| 271965 | 5711469 | 2.5             | 2   | 0.8 |     |     |     |
| 271965 | 5711469 | 1.7             | 1.7 | 1   |     |     |     |
| 271965 | 5711469 | 2.5             | 1.3 | 0.9 |     |     |     |
| 271965 | 5711469 | 2.7             | 1.8 | 1.5 |     |     |     |
| 271992 | 5713863 | 4               | 1.5 | 0.5 | 3.0 | 2.0 | 0.8 |
| 271992 | 5713863 | 3               | 1.7 | 1   |     |     |     |
| 271992 | 5713863 | 2.4             | 2.1 | 0.4 |     |     |     |
| 271992 | 5713863 | 2.5             | 1.5 | 0.6 |     |     |     |
| 271992 | 5713863 | 2.5             | 2.3 | 1   |     |     |     |
| 271992 | 5713863 | 4               | 2.5 | 1   |     |     |     |
| 271992 | 5713863 | 3               | 2   | 1   |     |     |     |
| 271992 | 5713863 | 2.5             | 2   | 0.5 |     |     |     |
| 271998 | 5712985 | 7.8             | 5.0 | 3.2 | 4.7 | 3.7 | 2.8 |
| 271998 | 5712985 | 6.0             | 5.3 | 4.6 |     |     |     |
| 271998 | 5712985 | 5.0             | 4.1 | 3.2 |     |     |     |
| 271998 | 5712985 | 4.6             | 3.6 | 3.3 |     |     |     |
| 271998 | 5712985 | 4.3             | 3.7 | 3.5 |     |     |     |

|        |         |     |     |     |     |     |     |
|--------|---------|-----|-----|-----|-----|-----|-----|
| 271998 | 5712985 | 5.1 | 4.3 | 2.0 |     |     |     |
| 271998 | 5712985 | 3.9 | 3.5 | 3.6 |     |     |     |
| 271998 | 5712985 | 4.7 | 3.5 | 2.4 |     |     |     |
| 271998 | 5712985 | 4.5 | 3.7 | 2.4 |     |     |     |
| 271998 | 5712985 | 4.2 | 3.3 | 3.0 |     |     |     |
| 271998 | 5712985 | 4.1 | 3.0 | 2.6 |     |     |     |
| 271998 | 5712985 | 4.2 | 3.1 | 2.2 |     |     |     |
| 271998 | 5712985 | 4.0 | 2.6 | 2.6 |     |     |     |
| 271998 | 5712985 | 3.7 | 2.8 | 2.6 |     |     |     |
| 271998 | 5712985 | 3.7 | 3.5 | 1.5 |     |     |     |
| 271998 | 5713606 | 3.7 | 2   | 1.6 | 2.9 | 1.8 | 1.0 |
| 271998 | 5713606 | 2.9 | 2   | 0.9 |     |     |     |
| 271998 | 5713606 | 3.3 | 1.3 | 1   |     |     |     |
| 271998 | 5713606 | 3.5 | 2.2 | 1.1 |     |     |     |
| 271998 | 5713606 | 2.2 | 2.1 | 1.4 |     |     |     |
| 271998 | 5713606 | 3.1 | 1.8 | 1.1 |     |     |     |
| 271998 | 5713606 | 2.4 | 1.4 | 0.9 |     |     |     |
| 271998 | 5713606 | 3.3 | 1.2 | 0.5 |     |     |     |
| 271998 | 5713606 | 2   | 1.6 | 1   |     |     |     |
| 271998 | 5713606 | 3.2 | 2   | 0.5 |     |     |     |
| 271998 | 5713606 | 3   | 1.5 | 0.8 |     |     |     |
| 271998 | 5713606 | 3   | 2   | 1   |     |     |     |
| 271998 | 5713606 | 2   | 2   | 1   |     |     |     |
| 272013 | 5711169 | 3.7 | 1.9 | 0.9 | 2.9 | 1.8 | 0.8 |
| 272013 | 5711169 | 3.7 | 2.5 | 0.7 |     |     |     |
| 272013 | 5711169 | 3.4 | 2.4 | 1   |     |     |     |
| 272013 | 5711169 | 2.2 | 1.7 | 0.7 |     |     |     |
| 272013 | 5711169 | 2.9 | 2.3 | 1.6 |     |     |     |
| 272013 | 5711169 | 2.4 | 1.5 | 0.6 |     |     |     |
| 272013 | 5711169 | 2.4 | 1.3 | 1   |     |     |     |
| 272013 | 5711169 | 2.1 | 2   | 1.1 |     |     |     |
| 272013 | 5711170 | 3.5 | 1.5 | 0.3 |     |     |     |

|        |         |     |     |     |     |     |     |
|--------|---------|-----|-----|-----|-----|-----|-----|
| 272013 | 5711170 | 3.5 | 2.2 | 0.5 |     |     |     |
| 272013 | 5711170 | 2.5 | 1   | 0.4 |     |     |     |
| 272013 | 5711170 | 2.5 | 1.8 | 0.5 |     |     |     |
| 272033 | 5711865 | 3.5 | 2.5 | 1.5 | 2.9 | 2.1 | 1.3 |
| 272033 | 5711865 | 2.5 | 2   | 0.9 |     |     |     |
| 272033 | 5711865 | 3.4 | 2.7 | 1   |     |     |     |
| 272033 | 5711865 | 2.6 | 1.9 | 1   |     |     |     |
| 272033 | 5711865 | 2.4 | 2.1 | 1.1 |     |     |     |
| 272033 | 5711865 | 1.9 | 1.4 | 1.2 |     |     |     |
| 272033 | 5711865 | 2.7 | 2.7 | 1.9 |     |     |     |
| 272033 | 5711865 | 3.1 | 2   | 1.1 |     |     |     |
| 272033 | 5711865 | 2.9 | 2.2 | 1.9 |     |     |     |
| 272033 | 5711865 | 3.1 | 1.8 | 0.9 |     |     |     |
| 272033 | 5711865 | 3.2 | 2.1 | 1.6 |     |     |     |
| 272033 | 5711865 | 3.7 | 1.5 | 1.5 |     |     |     |
| 272048 | 5713228 | 4.1 | 2.1 | 1.6 | 3.4 | 2.1 | 1.3 |
| 272048 | 5713228 | 3   | 1.9 | 1.4 |     |     |     |
| 272048 | 5713228 | 2.5 | 2.5 | 1   |     |     |     |
| 272048 | 5713228 | 4   | 1.5 | 1   |     |     |     |
| 272048 | 5713228 | 3   | 2   | 1   |     |     |     |
| 272048 | 5713228 | 2.5 | 2   | 1   |     |     |     |
| 272048 | 5713228 | 3   | 1.5 | 1.2 |     |     |     |
| 272048 | 5713228 | 3.2 | 2.2 | 1   |     |     |     |
| 272048 | 5713228 | 3.5 | 2   | 2   |     |     |     |
| 272048 | 5713228 | 4.5 | 3   | 2   |     |     |     |
| 272048 | 5713228 | 3   | 2.5 | 0.8 |     |     |     |
| 272048 | 5713228 | 4   | 2   | 1   |     |     |     |
| 272061 | 5714213 | 4.9 | 2   | 1   | 3.6 | 2.5 | 1.5 |
| 272061 | 5714213 | 3.3 | 1.6 | 1.5 |     |     |     |
| 272061 | 5714213 | 2.8 | 1.6 | 0.9 |     |     |     |
| 272061 | 5714213 | 2.9 | 1.9 | 1.6 |     |     |     |

|        |         |                 |     |     |     |     |     |
|--------|---------|-----------------|-----|-----|-----|-----|-----|
| 272061 | 5714213 | 2.8             | 1.2 | 1   |     |     |     |
| 272061 | 5714213 | 5               | 4   | 2   |     |     |     |
| 272061 | 5714213 | 3.5             | 3   | 1   |     |     |     |
| 272061 | 5714213 | 4               | 4   | 2   |     |     |     |
| 272061 | 5714213 | 3.5             | 2.4 | 2   |     |     |     |
| 272061 | 5714213 | 3.5             | 3   | 2   |     |     |     |
| 272065 | 5714800 | northern extent |     |     |     |     |     |
| 272072 | 5712758 | 3.5             | 3   | 1.5 | 3.9 | 2.6 | 1.4 |
| 272072 | 5712758 | 3.5             | 1.6 | 0.7 |     |     |     |
| 272072 | 5712758 | 3.3             | 2   | 0.8 |     |     |     |
| 272072 | 5712758 | 4               | 3   | 0.9 |     |     |     |
| 272072 | 5712758 | 6.4             | 4.4 | 1.7 |     |     |     |
| 272072 | 5712758 | 3.9             | 2.1 | 1.8 |     |     |     |
| 272072 | 5712758 | 5.2             | 2.5 | 1.3 |     |     |     |
| 272072 | 5712758 | 3               | 2.4 | 1   |     |     |     |
| 272072 | 5712758 | 3.7             | 3   | 1.5 |     |     |     |
| 272072 | 5712758 | 3               | 2.5 | 2   |     |     |     |
| 272072 | 5712758 | 3.3             | 2.3 | 1.6 |     |     |     |
| 272072 | 5712758 | 4               | 2.2 | 2   |     |     |     |
| 272117 | 5712433 | 6.4             | 5.2 | 3.0 | 5.5 | 4.2 | 3.3 |
| 272117 | 5712433 | 6.2             | 5.0 | 3.3 |     |     |     |
| 272117 | 5712433 | 6.0             | 5.1 | 3.3 |     |     |     |
| 272117 | 5712433 | 5.5             | 4.3 | 4.5 |     |     |     |
| 272117 | 5712433 | 5.4             | 4.9 | 4.0 |     |     |     |
| 272117 | 5712433 | 6.3             | 3.7 | 4.2 |     |     |     |
| 272117 | 5712433 | 6.0             | 4.1 | 3.7 |     |     |     |
| 272117 | 5712433 | 6.6             | 3.5 | 2.7 |     |     |     |
| 272117 | 5712433 | 4.7             | 4.2 | 3.7 |     |     |     |
| 272117 | 5712433 | 3.6             | 4.2 | 4.4 |     |     |     |
| 272117 | 5712433 | 5.5             | 4.0 | 2.7 |     |     |     |
| 272117 | 5712433 | 5.3             | 4.0 | 2.7 |     |     |     |

|        |         |     |     |     |     |     |     |
|--------|---------|-----|-----|-----|-----|-----|-----|
| 272117 | 5712433 | 5.0 | 4.1 | 2.7 |     |     |     |
| 272117 | 5712433 | 5.7 | 3.5 | 2.2 |     |     |     |
| 272117 | 5712433 | 3.8 | 3.2 | 2.5 |     |     |     |
| 272131 | 5714881 | 2   | 1   | 1   | 2.9 | 1.7 | 1.2 |
| 272131 | 5714881 | 3   | 1   | 1.2 |     |     |     |
| 272131 | 5714881 | 2.5 | 1.2 | 1   |     |     |     |
| 272131 | 5714881 | 3   | 1.5 | 1   |     |     |     |
| 272131 | 5714881 | 4   | 2   | 1   |     |     |     |
| 272131 | 5714881 | 2.5 | 2   | 1   |     |     |     |
| 272131 | 5714881 | 3.5 | 3   | 2   |     |     |     |
| 272131 | 5714881 | 3   | 2   | 1   |     |     |     |
| 272131 | 5714881 | 4   | 2   | 1.5 |     |     |     |
| 272131 | 5714881 | 2.5 | 2   | 1   |     |     |     |
| 272131 | 5714881 | 2.5 | 1.5 | 1.5 |     |     |     |
| 272131 | 5714881 | 2.5 | 1.5 | 1   |     |     |     |
| 272138 | 5713771 | 7.0 | 4.6 | 3.3 | 4.6 | 3.8 | 2.5 |
| 272138 | 5713771 | 6.3 | 6.0 | 2.1 |     |     |     |
| 272138 | 5713771 | 4.5 | 4.7 | 2.4 |     |     |     |
| 272138 | 5713771 | 4.5 | 3.7 | 2.8 |     |     |     |
| 272138 | 5713771 | 4.9 | 3.2 | 2.8 |     |     |     |
| 272138 | 5713771 | 4.8 | 3.5 | 2.4 |     |     |     |
| 272138 | 5713771 | 4.2 | 4.3 | 2.1 |     |     |     |
| 272138 | 5713771 | 4.2 | 3.7 | 2.4 |     |     |     |
| 272138 | 5713771 | 4.0 | 3.5 | 2.7 |     |     |     |
| 272138 | 5713771 | 3.7 | 3.2 | 3.1 |     |     |     |
| 272138 | 5713771 | 4.8 | 3.2 | 1.7 |     |     |     |
| 272138 | 5713771 | 4.5 | 2.5 | 2.7 |     |     |     |
| 272138 | 5713771 | 3.5 | 3.7 | 2.3 |     |     |     |
| 272138 | 5713771 | 4.5 | 3.2 | 1.7 |     |     |     |
| 272138 | 5713771 | 3.2 | 3.4 | 2.4 |     |     |     |
| 272162 | 5714624 | 3   | 1.5 | 0.8 | 3.3 | 1.8 | 1.0 |

|        |         |     |     |     |     |     |     |
|--------|---------|-----|-----|-----|-----|-----|-----|
| 272162 | 5714624 | 2   | 1   | 1   |     |     |     |
| 272162 | 5714624 | 2.5 | 1.5 | 1   |     |     |     |
| 272162 | 5714624 | 3   | 1   | 0.8 |     |     |     |
| 272162 | 5714624 | 4   | 2   | 1   |     |     |     |
| 272162 | 5714624 | 5   | 2   | 1   |     |     |     |
| 272162 | 5714624 | 4   | 2   | 1.5 |     |     |     |
| 272162 | 5714624 | 3.2 | 2   | 1   |     |     |     |
| 272162 | 5714624 | 3.5 | 2   | 1   |     |     |     |
| 272162 | 5714624 | 2.5 | 2   | 1   |     |     |     |
| 272162 | 5714624 | 3   | 2.2 | 1   |     |     |     |
| 272162 | 5714624 | 4   | 2   | 0.8 |     |     |     |
|        |         |     |     |     |     |     |     |
| 272167 | 5713046 | 3.5 | 2.4 | 1.3 | 3.9 | 2.8 | 1.8 |
| 272167 | 5713046 | 3.7 | 2.5 | 1   |     |     |     |
| 272167 | 5713046 | 3.3 | 2.5 | 1.1 |     |     |     |
| 272167 | 5713046 | 2.9 | 2   | 1.5 |     |     |     |
| 272167 | 5713046 | 5.5 | 4.5 | 2.1 |     |     |     |
| 272167 | 5713046 | 4.7 | 2.4 | 2.2 |     |     |     |
| 272167 | 5713046 | 6.5 | 4.9 | 1.9 |     |     |     |
| 272167 | 5713046 | 4.1 | 2.9 | 2.2 |     |     |     |
| 272167 | 5713046 | 3   | 3   | 2.6 |     |     |     |
| 272167 | 5713046 | 4.2 | 2.5 | 2   |     |     |     |
| 272167 | 5713046 | 2.6 | 2.5 | 1.7 |     |     |     |
| 272167 | 5713046 | 3.2 | 2   | 1.6 |     |     |     |
|        |         |     |     |     |     |     |     |
| 272173 | 5714471 | 3   | 2   | 0.8 | 2.5 | 1.5 | 0.8 |
| 272173 | 5714471 | 3.5 | 2   | 1   |     |     |     |
| 272173 | 5714471 | 2.5 | 2   | 0.5 |     |     |     |
| 272173 | 5714471 | 3   | 1   | 1   |     |     |     |
| 272173 | 5714471 | 2   | 1.5 | 0.8 |     |     |     |
| 272173 | 5714471 | 2.2 | 1   | 0.8 |     |     |     |
| 272173 | 5714471 | 2.5 | 1.5 | 1   |     |     |     |
| 272173 | 5714471 | 3   | 2   | 0.8 |     |     |     |
| 272173 | 5714471 | 2   | 1   | 0.7 |     |     |     |



|        |         |     |     |     |     |     |     |
|--------|---------|-----|-----|-----|-----|-----|-----|
| 272173 | 5714471 | 2   | 1.5 | 0.6 |     |     |     |
| 272173 | 5714471 | 2.5 | 1.5 | 1   |     |     |     |
| 272173 | 5714471 | 2   | 1   | 0.8 |     |     |     |
| 272188 | 5712331 | 4   | 2   | 1   | 3.9 | 2.3 | 1.3 |
| 272188 | 5712331 | 4.2 | 2.5 | 1   |     |     |     |
| 272188 | 5712331 | 5   | 2.5 | 1   |     |     |     |
| 272188 | 5712331 | 3   | 2.5 | 1.2 |     |     |     |
| 272188 | 5712331 | 4.5 | 1.5 | 1.4 |     |     |     |
| 272188 | 5712331 | 3.5 | 2.2 | 2.2 |     |     |     |
| 272188 | 5712331 | 4.7 | 3   | 1.3 |     |     |     |
| 272188 | 5712331 | 3.3 | 2   | 0.7 |     |     |     |
| 272188 | 5712331 | 3.6 | 2.4 | 1.3 |     |     |     |
| 272188 | 5712331 | 3.2 | 2.4 | 1.3 |     |     |     |
| 272188 | 5712331 | 3.1 | 2.5 | 1.2 |     |     |     |
| 272188 | 5712331 | 4.5 | 2   | 1.8 |     |     |     |

| Easting | Northing | Major (cm)        | Intermediate (cm) | Minor (cm) | Average | Major (cm) | Intermediate (cm) | Minor (cm) |
|---------|----------|-------------------|-------------------|------------|---------|------------|-------------------|------------|
| 266991  | 5715282  | 2.1               | 1.7               | 0.9        |         | 2.6        | 1.7               | 1.1        |
| 266991  | 5715282  | 4.8               | 2                 | 1.5        |         |            |                   |            |
| 266991  | 5715282  | 3.1               | 1.6               | 1.3        |         |            |                   |            |
| 266991  | 5715282  | 1.7               | 1.3               | 1.1        |         |            |                   |            |
| 266991  | 5715282  | 1.6               | 1.5               | 1          |         |            |                   |            |
| 266991  | 5715282  | 2.1               | 1.9               | 1          |         |            |                   |            |
| 267158  | 5715550  | 3.5               | 2.5               | 1          |         | 3.5        | 2.5               | 1          |
| 267683  | 5714231  | sparse new scoria |                   |            |         |            |                   |            |
| 267794  | 5714052  | 7.0               | 5.5               | 3.2        |         | 5.2        | 4.1               | 2.9        |
| 267794  | 5714052  | 6.6               | 5.4               | 3.0        |         |            |                   |            |
| 267794  | 5714052  | 7.3               | 4.2               | 3.4        |         |            |                   |            |
| 267794  | 5714052  | 5.7               | 4.0               | 3.5        |         |            |                   |            |
| 267794  | 5714052  | 6.4               | 3.6               | 3.1        |         |            |                   |            |
| 267794  | 5714052  | 5.4               | 4.1               | 3.5        |         |            |                   |            |
| 267794  | 5714052  | 5.2               | 4.5               | 3.3        |         |            |                   |            |
| 267794  | 5714052  | 5.9               | 3.6               | 3.2        |         |            |                   |            |
| 267794  | 5714052  | 5.0               | 4.6               | 2.4        |         |            |                   |            |
| 267794  | 5714052  | 4.3               | 3.7               | 3.7        |         |            |                   |            |
| 267794  | 5714052  | 5.3               | 3.9               | 1.9        |         |            |                   |            |
| 267794  | 5714052  | 4.4               | 3.7               | 2.4        |         |            |                   |            |
| 267794  | 5714052  | 3.6               | 4.6               | 2.2        |         |            |                   |            |
| 267794  | 5714052  | 3.7               | 3.7               | 2.6        |         |            |                   |            |
| 267794  | 5714052  | 4.1               | 3.0               | 2.6        |         |            |                   |            |
| 267794  | 5714052  | 3.4               | 4.0               | 1.8        |         |            |                   |            |
| 267837  | 5714741  | 3.7               | 2.6               | 1.8        |         | 2.6        | 1.8               | 1.3        |
| 267837  | 5714741  | 4.2               | 2.8               | 2.5        |         |            |                   |            |
| 267837  | 5714741  | 2.1               | 1.8               | 1          |         |            |                   |            |
| 267837  | 5714741  | 2                 | 1.7               | 1.3        |         |            |                   |            |

|        |         |               |     |     |     |     |     |
|--------|---------|---------------|-----|-----|-----|-----|-----|
| 267837 | 5714741 | 2.2           | 1   | 0.9 |     |     |     |
| 267837 | 5714741 | 2.4           | 1.5 | 1.5 |     |     |     |
| 267837 | 5714741 | 2             | 1.5 | 1.2 |     |     |     |
| 267837 | 5714741 | 2.2           | 1.8 | 1   |     |     |     |
| 267837 | 5714741 | 1.7           | 1.2 | 0.9 |     |     |     |
| 267837 | 5714741 | 2.1           | 1.3 | 1.3 |     |     |     |
| 267837 | 5714741 | 4.5           | 3.4 | 1.6 |     |     |     |
| 267837 | 5714741 | 1.7           | 1   | 0.9 |     |     |     |
| 267921 | 5714560 | no new scoria |     |     |     |     |     |
| 268009 | 5713603 | 6.9           | 5.3 | 4.1 | 4.8 | 4.0 | 2.3 |
| 268009 | 5713603 | 5.8           | 6.0 | 3.6 |     |     |     |
| 268009 | 5713603 | 5.0           | 4.6 | 3.0 |     |     |     |
| 268009 | 5713603 | 5.8           | 4.6 | 2.1 |     |     |     |
| 268009 | 5713603 | 5.0           | 4.1 | 2.5 |     |     |     |
| 268009 | 5713603 | 5.2           | 3.8 | 2.1 |     |     |     |
| 268009 | 5713603 | 4.8           | 3.8 | 2.5 |     |     |     |
| 268009 | 5713603 | 5.0           | 3.5 | 1.8 |     |     |     |
| 268009 | 5713603 | 5.0           | 3.0 | 2.1 |     |     |     |
| 268009 | 5713603 | 4.6           | 3.3 | 1.9 |     |     |     |
| 268009 | 5713603 | 4.6           | 3.5 | 1.5 |     |     |     |
| 268009 | 5713603 | 3.5           | 3.6 | 2.4 |     |     |     |
| 268009 | 5713603 | 3.6           | 3.8 | 1.9 |     |     |     |
| 268009 | 5713603 | 3.6           | 4.1 | 1.5 |     |     |     |
| 268009 | 5713603 | 3.6           | 3.0 | 1.8 |     |     |     |
| 260858 | 5712453 | 2             | 2   | 1   | 2.5 | 1.9 | 1.0 |
| 260858 | 5712453 | 2.8           | 1.5 | 0.6 |     |     |     |
| 260858 | 5712453 | 3             | 1.7 | 1   |     |     |     |
| 260858 | 5712453 | 2.5           | 2.5 | 1.4 |     |     |     |
| 260858 | 5712453 | 2.5           | 2   | 1.3 |     |     |     |
| 260858 | 5712453 | 2.2           | 2   | 1.2 |     |     |     |
| 260858 | 5712453 | 2.4           | 1.4 | 0.7 |     |     |     |

|        |         |     |     |     |     |     |     |
|--------|---------|-----|-----|-----|-----|-----|-----|
| 268154 | 5713170 | 5.2 | 4.6 | 2.8 | 3.3 | 2.7 | 1.4 |
| 268154 | 5713170 | 4.6 | 4.2 | 1.7 |     |     |     |
| 268154 | 5713170 | 3.9 | 2.6 | 0.8 |     |     |     |
| 268154 | 5713170 | 3.5 | 3   | 0.7 |     |     |     |
| 268154 | 5713170 | 3   | 2.2 | 0.6 |     |     |     |
| 268154 | 5713170 | 3.4 | 3.2 | 1.1 |     |     |     |
| 268154 | 5713170 | 3.4 | 2.2 | 2.5 |     |     |     |
| 268154 | 5713170 | 2.3 | 2   | 1   |     |     |     |
| 268154 | 5713170 | 2   | 1.7 | 1.5 |     |     |     |
| 268154 | 5713170 | 1.6 | 1.2 | 1   |     |     |     |
| 268198 | 5713603 | 2   | 1.6 | 1.3 | 1.8 | 1.1 | 0.7 |
| 268198 | 5713603 | 1.5 | 1   | 0.7 |     |     |     |
| 268198 | 5713603 | 1.8 | 1.1 | 1.3 |     |     |     |
| 268198 | 5713603 | 1.6 | 1.1 | 0.6 |     |     |     |
| 268198 | 5713603 | 1.2 | 0.9 | 0.6 |     |     |     |
| 268198 | 5713603 | 1.8 | 1.3 | 0.6 |     |     |     |
| 268198 | 5713603 | 1.7 | 1   | 0.5 |     |     |     |
| 268198 | 5713603 | 2   | 1.4 | 0.8 |     |     |     |
| 268198 | 5713603 | 2.3 | 1.4 | 0.7 |     |     |     |
| 268198 | 5713603 | 2   | 1.2 | 0.6 |     |     |     |
| 268198 | 5713603 | 1.2 | 0.7 | 0.4 |     |     |     |
| 268198 | 5713603 | 2   | 0.6 | 0.4 |     |     |     |
| 268235 | 5713143 | 1.6 | 1.3 | 0.5 | 1.5 | 1.2 | 0.5 |
| 268235 | 5713143 | 1.1 | 1   | 0.6 |     |     |     |
| 268235 | 5713143 | 0.9 | 0.7 | 0.4 |     |     |     |
| 268235 | 5713143 | 0.9 | 0.7 | 0.5 |     |     |     |
| 268235 | 5713143 | 1.1 | 0.9 | 0.6 |     |     |     |
| 268235 | 5713143 | 1.1 | 0.8 | 0.4 |     |     |     |
| 268235 | 5713143 | 2.6 | 1.8 | 0.5 |     |     |     |
| 268235 | 5713143 | 1.5 | 1.1 | 0.5 |     |     |     |
| 268235 | 5713143 | 1.5 | 1.2 | 0.4 |     |     |     |

|        |         |     |     |     |     |     |     |
|--------|---------|-----|-----|-----|-----|-----|-----|
| 268235 | 5713143 | 2.2 | 1.5 | 0.5 |     |     |     |
| 268235 | 5713143 | 2   | 1.4 | 1   |     |     |     |
| 268235 | 5713143 | 1.5 | 1.5 | 0.5 |     |     |     |
| 268267 | 5714012 | 2.5 | 1.5 | 1   | 2.1 | 1.5 | 0.9 |
| 268267 | 5714012 | 2   | 1.5 | 0.8 |     |     |     |
| 268267 | 5714012 | 1.8 | 1.5 | 0.8 |     |     |     |
| 268272 | 5714005 | 1.5 | 1.4 | 1.2 |     |     |     |
| 268272 | 5714005 | 1.7 | 1   | 0.7 |     |     |     |
| 268272 | 5714005 | 1.2 | 0.9 | 0.7 |     |     |     |
| 268272 | 5714005 | 2.6 | 1.8 | 0.6 |     |     |     |
| 268272 | 5714005 | 3.6 | 2.1 | 2   |     |     |     |
| 268272 | 5714005 | 2.1 | 1.7 | 1   |     |     |     |
| 268272 | 5714005 | 1.7 | 1.2 | 0.5 |     |     |     |
| 268272 | 5714005 | 2   | 1.5 | 0.7 |     |     |     |
| 268272 | 5714005 | 2.4 | 1.9 | 1.3 |     |     |     |
| 268545 | 5712895 | 6.1 | 4.9 | 2.7 | 5.1 | 3.9 | 2.4 |
| 268545 | 5712895 | 6.0 | 5.2 | 2.3 |     |     |     |
| 268545 | 5712895 | 6.2 | 4.5 | 2.7 |     |     |     |
| 268545 | 5712895 | 6.0 | 3.6 | 3.3 |     |     |     |
| 268545 | 5712895 | 5.0 | 3.9 | 3.0 |     |     |     |
| 268545 | 5712895 | 4.9 | 6.0 | 0.9 |     |     |     |
| 268545 | 5712895 | 4.9 | 4.1 | 2.6 |     |     |     |
| 268545 | 5712895 | 4.9 | 4.0 | 2.6 |     |     |     |
| 268545 | 5712895 | 4.9 | 3.4 | 2.6 |     |     |     |
| 268545 | 5712895 | 5.1 | 3.2 | 2.4 |     |     |     |
| 268545 | 5712895 | 4.2 | 3.1 | 3.2 |     |     |     |
| 268545 | 5712895 | 4.2 | 3.7 | 2.4 |     |     |     |
| 268545 | 5712895 | 5.3 | 3.0 | 1.8 |     |     |     |
| 268545 | 5712895 | 5.2 | 3.0 | 1.8 |     |     |     |
| 268545 | 5712895 | 3.7 | 3.3 | 1.3 |     |     |     |
| 268570 | 5712209 | 3.5 | 2.5 | 1.4 | 2.0 | 1.3 | 0.7 |

|        |         |     |     |     |     |     |     |
|--------|---------|-----|-----|-----|-----|-----|-----|
| 268570 | 5712209 | 2.2 | 2   | 1.1 |     |     |     |
| 268570 | 5712209 | 1.7 | 1   | 1   |     |     |     |
| 268570 | 5712209 | 1.1 | 0.9 | 0.7 |     |     |     |
| 268570 | 5712209 | 2.4 | 1.9 | 0.5 |     |     |     |
| 268570 | 5712209 | 1.9 | 1.1 | 0.4 |     |     |     |
| 268570 | 5712209 | 1.5 | 1   | 0.7 |     |     |     |
| 268570 | 5712209 | 1.7 | 0.7 | 0.3 |     |     |     |
| 268570 | 5712209 | 1.9 | 1.5 | 0.4 |     |     |     |
| 268570 | 5712209 | 2.9 | 1.5 | 1.2 |     |     |     |
| 268570 | 5712209 | 1.4 | 0.8 | 0.7 |     |     |     |
| 268570 | 5712209 | 1.6 | 1.1 | 1   |     |     |     |
| 268570 | 5712209 | 2.1 | 1.6 | 0.4 |     |     |     |
| 268570 | 5712209 | 1.8 | 1.2 | 0.5 |     |     |     |
|        |         |     |     |     |     |     |     |
| 268746 | 5712931 | 2.7 | 1.8 | 0.8 | 1.5 | 1.0 | 0.5 |
| 268746 | 5712931 | 1.1 | 0.9 | 0.6 |     |     |     |
| 268746 | 5712931 | 1.6 | 0.9 | 0.6 |     |     |     |
| 268746 | 5712931 | 0.9 | 0.8 | 0.4 |     |     |     |
| 268746 | 5712931 | 0.9 | 0.8 | 0.3 |     |     |     |
| 268746 | 5712931 | 2.2 | 1.2 | 0.6 |     |     |     |
| 268746 | 5712931 | 2   | 1   | 0.8 |     |     |     |
| 268746 | 5712931 | 1.2 | 0.9 | 0.2 |     |     |     |
| 268746 | 5712931 | 1.2 | 0.8 | 0.4 |     |     |     |
| 268746 | 5712931 | 1.5 | 0.8 | 0.4 |     |     |     |
| 268746 | 5712931 | 1.4 | 0.8 | 0.5 |     |     |     |
| 268746 | 5712931 | 1   | 0.7 | 0.4 |     |     |     |
|        |         |     |     |     |     |     |     |
| 268772 | 5713657 | 6.5 | 5.5 | 5.9 | 5.4 | 4.1 | 3.3 |
| 268772 | 5713657 | 7.2 | 5.4 | 3.2 |     |     |     |
| 268772 | 5713657 | 6.0 | 4.9 | 4.2 |     |     |     |
| 268772 | 5713657 | 5.4 | 4.8 | 4.8 |     |     |     |
| 268772 | 5713657 | 5.5 | 4.6 | 4.0 |     |     |     |
| 268772 | 5713657 | 5.8 | 4.0 | 3.3 |     |     |     |
| 268772 | 5713657 | 5.4 | 3.7 | 4.0 |     |     |     |

|        |         |     |     |     |     |     |     |
|--------|---------|-----|-----|-----|-----|-----|-----|
| 268772 | 5713657 | 6.5 | 4.0 | 2.5 |     |     |     |
| 268772 | 5713657 | 5.4 | 4.0 | 2.5 |     |     |     |
| 268772 | 5713657 | 5.0 | 4.0 | 2.9 |     |     |     |
| 268772 | 5713657 | 4.6 | 3.4 | 3.2 |     |     |     |
| 268772 | 5713657 | 5.4 | 3.7 | 2.0 |     |     |     |
| 268772 | 5713657 | 4.0 | 3.3 | 3.7 |     |     |     |
| 268772 | 5713657 | 4.2 | 3.6 | 1.8 |     |     |     |
| 268772 | 5713657 | 4.5 | 3.0 | 1.8 |     |     |     |
| 269003 | 5713728 | 1.1 | 0.8 | 0.5 | 1.9 | 1.4 | 0.7 |
| 269003 | 5713728 | 1.6 | 1.5 | 0.9 |     |     |     |
| 269003 | 5713728 | 1.2 | 0.9 | 0.5 |     |     |     |
| 269003 | 5713728 | 3.2 | 3.1 | 1   |     |     |     |
| 269003 | 5713728 | 2.3 | 1.2 | 0.5 |     |     |     |
| 269003 | 5713728 | 1.4 | 0.9 | 0.5 |     |     |     |
| 269004 | 5713727 | 2.5 | 2   | 1.5 |     |     |     |
| 269004 | 5713727 | 2.4 | 1.3 | 1   |     |     |     |
| 269004 | 5713727 | 1.5 | 1.2 | 0.6 |     |     |     |
| 269004 | 5713727 | 2.6 | 1.8 | 0.7 |     |     |     |
| 269004 | 5713727 | 2   | 1.5 | 0.4 |     |     |     |
| 269004 | 5713727 | 1.1 | 1   | 0.7 |     |     |     |
| 269014 | 5712036 | 4.2 | 3.5 | 1.8 | 3.2 | 2.6 | 1.5 |
| 269014 | 5712036 | 2.9 | 2.6 | 1.8 |     |     |     |
| 269014 | 5712036 | 3.4 | 2.3 | 1.4 |     |     |     |
| 269014 | 5712036 | 4.4 | 3.5 | 2.5 |     |     |     |
| 269014 | 5712036 | 3.5 | 3   | 2   |     |     |     |
| 269014 | 5712036 | 1.7 | 1.2 | 1   |     |     |     |
| 269014 | 5712036 | 2.8 | 2.4 | 1.4 |     |     |     |
| 269014 | 5712036 | 4.5 | 3.5 | 1   |     |     |     |
| 269014 | 5712036 | 2.8 | 2.4 | 1.4 |     |     |     |
| 269014 | 5712036 | 4.5 | 3.5 | 1   |     |     |     |
| 269014 | 5712036 | 2.4 | 2   | 1   |     |     |     |
| 269014 | 5712036 | 2.8 | 1.9 | 0.9 |     |     |     |

|        |         |     |     |     |     |     |     |
|--------|---------|-----|-----|-----|-----|-----|-----|
| 269014 | 5712036 | 2.1 | 1.7 | 1.7 |     |     |     |
| 269014 | 5712036 | 3   | 2.9 | 2.8 |     |     |     |
| 269014 | 5712036 | 2.2 | 2   | 1.4 |     |     |     |
| 269014 | 5712036 | 3.8 | 2.7 | 0.9 |     |     |     |
| 269236 | 5712696 | 1.2 | 0.9 | 0.4 | 1.7 | 1.1 | 0.6 |
| 269236 | 5712696 | 2.4 | 1.3 | 0.8 |     |     |     |
| 269236 | 5712696 | 1.3 | 1.1 | 0.8 |     |     |     |
| 269236 | 5712696 | 2.2 | 1   | 0.5 |     |     |     |
| 269236 | 5712696 | 2.2 | 1.2 | 0.4 |     |     |     |
| 269236 | 5712696 | 1.8 | 1.3 | 1   |     |     |     |
| 269236 | 5712696 | 2   | 1   | 0.9 |     |     |     |
| 269236 | 5712696 | 1.3 | 0.8 | 0.5 |     |     |     |
| 269236 | 5712696 | 1.9 | 1.4 | 0.8 |     |     |     |
| 269236 | 5712696 | 1.4 | 1.2 | 0.8 |     |     |     |
| 269236 | 5712696 | 1.4 | 1   | 0.6 |     |     |     |
| 269236 | 5712696 | 1.1 | 1   | 0.2 |     |     |     |
| 269240 | 5713221 | 1.5 | 1   | 0.8 | 1.7 | 1.2 | 0.8 |
| 269240 | 5713221 | 3   | 2.2 | 1   |     |     |     |
| 269240 | 5713221 | 1.8 | 1.2 | 0.8 |     |     |     |
| 269240 | 5713221 | 2.5 | 2   | 1.2 |     |     |     |
| 269240 | 5713221 | 1.5 | 1   | 0.6 |     |     |     |
| 269240 | 5713221 | 1.2 | 1   | 0.3 |     |     |     |
| 269240 | 5713221 | 1.5 | 1.3 | 1   |     |     |     |
| 269240 | 5713221 | 1.5 | 0.8 | 0.5 |     |     |     |
| 269240 | 5713221 | 1.8 | 0.8 | 0.5 |     |     |     |
| 269240 | 5713221 | 1.8 | 1.4 | 1   |     |     |     |
| 269240 | 5713221 | 1.5 | 1   | 0.8 |     |     |     |
| 269240 | 5713221 | 1   | 1   | 0.6 |     |     |     |
| 269334 | 5712684 | 5.6 | 4.8 | 3.2 | 4.3 | 3.4 | 2.2 |
| 269334 | 5712684 | 5.0 | 4.8 | 3.7 |     |     |     |
| 269334 | 5712684 | 5.5 | 4.2 | 2.8 |     |     |     |



|        |         |     |     |     |     |     |     |
|--------|---------|-----|-----|-----|-----|-----|-----|
| 269334 | 5712684 | 4.8 | 4.6 | 2.4 |     |     |     |
| 269334 | 5712684 | 4.8 | 2.9 | 2.5 |     |     |     |
| 269334 | 5712684 | 3.4 | 4.0 | 2.4 |     |     |     |
| 269334 | 5712684 | 4.3 | 4.2 | 1.0 |     |     |     |
| 269334 | 5712684 | 4.1 | 3.0 | 2.3 |     |     |     |
| 269334 | 5712684 | 4.1 | 2.9 | 2.3 |     |     |     |
| 269334 | 5712684 | 3.8 | 2.7 | 2.5 |     |     |     |
| 269334 | 5712684 | 3.4 | 3.3 | 1.6 |     |     |     |
| 269334 | 5712684 | 4.0 | 2.2 | 2.0 |     |     |     |
| 269334 | 5712684 | 3.9 | 1.7 | 2.5 |     |     |     |
| 269334 | 5712684 | 3.6 | 3.2 | 1.2 |     |     |     |
| 269334 | 5712684 | 3.8 | 1.8 | 1.2 |     |     |     |
|        |         |     |     |     |     |     |     |
| 269342 | 5713103 | 5.3 | 3.7 | 2.0 | 4.1 | 3.3 | 2.0 |
| 269342 | 5713103 | 5.2 | 2.6 | 2.7 |     |     |     |
| 269342 | 5713103 | 4.5 | 3.2 | 1.7 |     |     |     |
| 269342 | 5713103 | 4.4 | 2.5 | 1.8 |     |     |     |
| 269342 | 5713103 | 4.4 | 3.7 | 2.6 |     |     |     |
| 269342 | 5713103 | 4.4 | 3.7 | 2.3 |     |     |     |
| 269342 | 5713103 | 4.0 | 3.9 | 2.6 |     |     |     |
| 269342 | 5713103 | 4.0 | 3.5 | 2.4 |     |     |     |
| 269342 | 5713103 | 4.0 | 3.1 | 1.8 |     |     |     |
| 269342 | 5713103 | 4.0 | 1.9 | 1.1 |     |     |     |
| 269342 | 5713103 | 4.0 | 3.8 | 2.1 |     |     |     |
| 269342 | 5713103 | 3.7 | 3.0 | 2.0 |     |     |     |
| 269342 | 5713103 | 3.6 | 3.9 | 1.2 |     |     |     |
| 269342 | 5713103 | 3.6 | 3.9 | 2.5 |     |     |     |
| 269342 | 5713103 | 3.5 | 3.0 | 1.4 |     |     |     |
| 269342 | 5713103 | 3.2 | 2.8 | 1.9 |     |     |     |
|        |         |     |     |     |     |     |     |
| 269367 | 5713965 | 1.2 | 0.6 | 0.5 | 1.5 | 0.9 | 0.6 |
| 269367 | 5713965 | 1.2 | 0.8 | 0.7 |     |     |     |
| 269367 | 5713965 | 1.3 | 0.7 | 0.6 |     |     |     |
| 269367 | 5713965 | 2   | 0.9 | 0.6 |     |     |     |

|        |         |     |     |     |     |     |     |
|--------|---------|-----|-----|-----|-----|-----|-----|
| 269367 | 5713965 | 1.5 | 0.5 | 0.5 |     |     |     |
| 269367 | 5713965 | 1.8 | 1.5 | 0.5 |     |     |     |
| 269368 | 5713979 | 1.5 | 0.8 | 0.5 |     |     |     |
| 269368 | 5713979 | 1.5 | 1   | 1   |     |     |     |
| 269368 | 5713979 | 2   | 1.5 | 0.8 |     |     |     |
| 269368 | 5713979 | 2.3 | 1.5 | 1   |     |     |     |
| 269368 | 5713979 | 0.7 | 0.6 | 0.3 |     |     |     |
| 269368 | 5713979 | 1   | 0.6 | 0.3 |     |     |     |
| 269368 | 5713979 | 1   | 0.7 | 0.3 |     |     |     |
| 269373 | 5713613 | 1.7 | 0.8 | 0.5 | 1.5 | 1.1 | 0.6 |
| 269373 | 5713613 | 1.2 | 1   | 0.9 |     |     |     |
| 269373 | 5713613 | 1.7 | 1.5 | 0.2 |     |     |     |
| 269373 | 5713613 | 1.9 | 1   | 0.4 |     |     |     |
| 269374 | 5713622 | 1.5 | 0.8 | 0.4 |     |     |     |
| 269374 | 5713622 | 1.4 | 1   | 0.4 |     |     |     |
| 269374 | 5713622 | 1.5 | 1.3 | 0.9 |     |     |     |
| 269374 | 5713622 | 1.4 | 0.9 | 0.7 |     |     |     |
| 269374 | 5713622 | 1.5 | 0.9 | 0.6 |     |     |     |
| 269374 | 5713622 | 2   | 1.5 | 0.9 |     |     |     |
| 269374 | 5713622 | 1.4 | 1.2 | 1   |     |     |     |
| 269374 | 5713622 | 0.9 | 0.9 | 0.4 |     |     |     |
| 269439 | 5711714 | 3.2 | 2.2 | 1   | 2.5 | 1.8 | 1.0 |
| 269439 | 5711714 | 4.4 | 3.4 | 1.4 |     |     |     |
| 269439 | 5711714 | 3.3 | 2.2 | 1.1 |     |     |     |
| 269439 | 5711714 | 3.8 | 3.5 | 2   |     |     |     |
| 269439 | 5711714 | 1.5 | 0.7 | 0.3 |     |     |     |
| 269439 | 5711714 | 1.5 | 0.9 | 0.7 |     |     |     |
| 269439 | 5711714 | 2   | 1.4 | 0.8 |     |     |     |
| 269439 | 5711714 | 2   | 1.9 | 0.6 |     |     |     |
| 269439 | 5711714 | 1.2 | 1.1 | 0.7 |     |     |     |
| 269439 | 5711714 | 1.6 | 1   | 0.3 |     |     |     |
| 269439 | 5711714 | 2.3 | 1.7 | 1   |     |     |     |

|        |         |     |     |     |     |     |     |
|--------|---------|-----|-----|-----|-----|-----|-----|
| 269439 | 5711714 | 2.6 | 1.5 | 1.5 |     |     |     |
| 269457 | 5713012 | 1.5 | 1   | 1   | 2.0 | 1.2 | 0.9 |
| 269457 | 5713012 | 2.5 | 1.5 | 0.8 |     |     |     |
| 269457 | 5713012 | 4   | 1.5 | 1   |     |     |     |
| 269457 | 5713012 | 2   | 1   | 1   |     |     |     |
| 269457 | 5713012 | 1.2 | 1   | 1   |     |     |     |
| 269457 | 5713012 | 1.5 | 1.2 | 1   |     |     |     |
| 269457 | 5713012 | 1.5 | 1.2 | 1   |     |     |     |
| 269457 | 5713012 | 1.5 | 1   | 0.8 |     |     |     |
| 269457 | 5713012 | 2.5 | 1.2 | 1   |     |     |     |
| 269457 | 5713012 | 2.1 | 1.5 | 1   |     |     |     |
| 269457 | 5713012 | 2.5 | 1.5 | 1   |     |     |     |
| 269457 | 5713012 | 1   | 1   | 0.5 |     |     |     |
| 269630 | 5713977 | 2.5 | 1.5 | 1   | 1.7 | 1.1 | 0.6 |
| 269630 | 5713977 | 1.8 | 1   | 1   |     |     |     |
| 269630 | 5713977 | 2   | 1.3 | 1   |     |     |     |
| 269636 | 5713969 | 1.1 | 0.9 | 0.4 |     |     |     |
| 269636 | 5713969 | 1.7 | 1.2 | 0.6 |     |     |     |
| 269636 | 5713969 | 1.6 | 1.4 | 0.7 |     |     |     |
| 269636 | 5713969 | 2.9 | 1   | 0.6 |     |     |     |
| 269636 | 5713969 | 1.4 | 1.3 | 0.8 |     |     |     |
| 269636 | 5713969 | 2.2 | 1.4 | 0.5 |     |     |     |
| 269636 | 5713969 | 1.9 | 0.7 | 0.4 |     |     |     |
| 269636 | 5713969 | 1   | 0.5 | 0.3 |     |     |     |
| 269636 | 5713969 | 0.6 | 0.4 | 0.2 |     |     |     |
| 269728 | 5712967 | 1.2 | 1.1 | 1   | 1.6 | 1.1 | 0.7 |
| 269728 | 5712967 | 2.3 | 1.5 | 1   |     |     |     |
| 269728 | 5712967 | 1.8 | 1.6 | 1   |     |     |     |
| 269728 | 5712967 | 1.8 | 1   | 0.6 |     |     |     |
| 269728 | 5712967 | 1   | 0.5 | 0.4 |     |     |     |
| 269728 | 5712967 | 1.5 | 1   | 0.5 |     |     |     |

|        |         |     |     |     |     |     |     |
|--------|---------|-----|-----|-----|-----|-----|-----|
| 269728 | 5712967 | 1.5 | 1   | 0.5 |     |     |     |
| 269728 | 5712967 | 2.1 | 1.5 | 1   |     |     |     |
| 269728 | 5712967 | 1.5 | 1   | 0.8 |     |     |     |
| 269728 | 5712967 | 1   | 1   | 0.6 |     |     |     |
| 269728 | 5712967 | 2   | 1   | 0.8 |     |     |     |
| 269728 | 5712967 | 1.6 | 0.8 | 0.5 |     |     |     |
| 269734 | 5712110 | 1.7 | 0.9 | 0.3 | 1.4 | 0.8 | 0.4 |
| 269734 | 5712110 | 1.5 | 0.6 | 0.3 |     |     |     |
| 269734 | 5712110 | 2.2 | 1   | 0.4 |     |     |     |
| 269734 | 5712110 | 1.9 | 1.5 | 0.4 |     |     |     |
| 269734 | 5712110 | 1.3 | 0.6 | 0.4 |     |     |     |
| 269734 | 5712110 | 1.5 | 0.6 | 0.4 |     |     |     |
| 269734 | 5712110 | 1.4 | 0.8 | 0.4 |     |     |     |
| 269734 | 5712110 | 1.3 | 0.6 | 0.4 |     |     |     |
| 269734 | 5712110 | 1   | 0.9 | 0.5 |     |     |     |
| 269734 | 5712110 | 1   | 0.5 | 0.5 |     |     |     |
| 269734 | 5712110 | 1.2 | 0.5 | 0.3 |     |     |     |
| 269734 | 5712110 | 1   | 0.6 | 0.5 |     |     |     |
| 269827 | 5713004 | 6.6 | 5.2 | 4.3 | 4.3 | 3.5 | 2.4 |
| 269827 | 5713004 | 5.7 | 2.2 | 1.6 |     |     |     |
| 269827 | 5713004 | 5.0 | 4.6 | 1.8 |     |     |     |
| 269827 | 5713004 | 5.0 | 3.7 | 2.4 |     |     |     |
| 269827 | 5713004 | 4.9 | 2.4 | 2.4 |     |     |     |
| 269827 | 5713004 | 4.7 | 4.6 | 1.8 |     |     |     |
| 269827 | 5713004 | 4.2 | 3.9 | 2.9 |     |     |     |
| 269827 | 5713004 | 4.2 | 3.7 | 2.4 |     |     |     |
| 269827 | 5713004 | 4.1 | 4.2 | 2.6 |     |     |     |
| 269827 | 5713004 | 4.0 | 2.7 | 2.3 |     |     |     |
| 269827 | 5713004 | 3.9 | 3.6 | 1.2 |     |     |     |
| 269827 | 5713004 | 3.8 | 3.2 | 3.0 |     |     |     |
| 269827 | 5713004 | 3.8 | 3.9 | 3.0 |     |     |     |
| 269827 | 5713004 | 3.7 | 3.0 | 1.8 |     |     |     |

|        |         |     |     |     |     |     |     |
|--------|---------|-----|-----|-----|-----|-----|-----|
| 269827 | 5713004 | 3.6 | 2.8 | 2.2 |     |     |     |
| 269827 | 5713004 | 3.6 | 2.8 | 2.3 |     |     |     |
| 269827 | 5713004 | 3.5 | 3.4 | 2.2 |     |     |     |
| 269827 | 5713004 | 3.2 | 2.8 | 2.6 |     |     |     |
| 270035 | 5712926 | 1   | 0.8 | 0.5 | 1.1 | 0.9 | 0.5 |
| 270035 | 5712926 | 1   | 0.8 | 0.5 |     |     |     |
| 270035 | 5712926 | 1   | 1   | 0.5 |     |     |     |
| 270035 | 5712926 | 0.5 | 0.5 | 0.2 |     |     |     |
| 270035 | 5712926 | 1   | 0.8 | 0.2 |     |     |     |
| 270035 | 5712926 | 1.2 | 0.9 | 0.5 |     |     |     |
| 270035 | 5712926 | 1   | 0.5 | 0.2 |     |     |     |
| 270035 | 5712926 | 1   | 1   | 0.5 |     |     |     |
| 270035 | 5712926 | 1   | 0.9 | 0.5 |     |     |     |
| 270035 | 5712926 | 2.5 | 1.9 | 1   |     |     |     |
| 270035 | 5712926 | 2   | 1.5 | 1   |     |     |     |
| 270035 | 5712926 | 0.5 | 0.5 | 0.3 |     |     |     |
| 270099 | 5713477 | 0.8 | 0.7 | 0.5 | 1.9 | 1.4 | 1.0 |
| 270099 | 5713477 | 2.2 | 1.6 | 1.2 |     |     |     |
| 270099 | 5713477 | 2.5 | 1.5 | 1.3 |     |     |     |
| 270099 | 5713477 | 1.9 | 1.5 | 1   |     |     |     |
| 270099 | 5713477 | 1.6 | 1.5 | 1   |     |     |     |
| 270099 | 5713477 | 1.8 | 1.4 | 1.1 |     |     |     |
| 270099 | 5713477 | 1.9 | 1.6 | 1.4 |     |     |     |
| 270099 | 5713477 | 1.5 | 1   | 0.8 |     |     |     |
| 270099 | 5713477 | 2   | 1.4 | 1.1 |     |     |     |
| 270099 | 5713477 | 2.5 | 2   | 1.5 |     |     |     |
| 270099 | 5713477 | 1.8 | 1.1 | 0.6 |     |     |     |
| 270099 | 5713477 | 2.2 | 1.9 | 1.2 |     |     |     |
| 270099 | 5713477 | 2.1 | 1   | 0.7 |     |     |     |
| 270182 | 5712432 | 4   | 3   | 2   | 3.1 | 2.0 | 1.2 |
| 270182 | 5712432 | 3.5 | 2   | 1   |     |     |     |

|        |         |     |     |     |     |     |     |
|--------|---------|-----|-----|-----|-----|-----|-----|
| 270182 | 5712432 | 2.5 | 2   | 1   |     |     |     |
| 270182 | 5712432 | 3   | 2   | 1.2 |     |     |     |
| 270182 | 5712432 | 2.2 | 1   | 0.7 |     |     |     |
| 270182 | 5712432 | 2   | 2   | 1   |     |     |     |
| 270182 | 5712432 | 5   | 3   | 2   |     |     |     |
| 270182 | 5712432 | 3   | 1.5 | 1.2 |     |     |     |
| 270182 | 5712432 | 3.2 | 2.5 | 1   |     |     |     |
| 270182 | 5712432 | 4   | 1.8 | 0.8 |     |     |     |
| 270182 | 5712432 | 3.2 | 1.5 | 1   |     |     |     |
| 270182 | 5712432 | 2   | 1.5 | 0.9 |     |     |     |
|        |         |     |     |     |     |     |     |
| 270185 | 5713957 | 2.5 | 1.8 | 0.9 | 1.9 | 1.4 | 0.8 |
| 270185 | 5713957 | 1.2 | 0.8 | 0.6 |     |     |     |
| 270185 | 5713957 | 1   | 0.9 | 0.5 |     |     |     |
| 270185 | 5713957 | 2.4 | 1.4 | 1.1 |     |     |     |
| 270185 | 5713957 | 2.6 | 1.8 | 1   |     |     |     |
| 270185 | 5713957 | 2.2 | 2   | 1   |     |     |     |
| 270195 | 5713958 | 1.5 | 1.5 | 1   |     |     |     |
| 270195 | 5713958 | 2.5 | 1.5 | 1   |     |     |     |
| 270195 | 5713958 | 2   | 2   | 0.8 |     |     |     |
| 270195 | 5713958 | 1.9 | 0.9 | 0.5 |     |     |     |
| 270195 | 5713958 | 1.8 | 1   | 0.5 |     |     |     |
| 270195 | 5713958 | 1.5 | 0.7 | 0.4 |     |     |     |
|        |         |     |     |     |     |     |     |
| 270233 | 5711743 | 2   | 1   | 0.7 | 1.7 | 1.1 | 0.5 |
| 270233 | 5711743 | 2.2 | 2   | 0.8 |     |     |     |
| 270233 | 5711743 | 2.5 | 1.5 | 1   |     |     |     |
| 270233 | 5711743 | 1.5 | 1.5 | 0.3 |     |     |     |
| 270233 | 5711743 | 2   | 1.2 | 0.9 |     |     |     |
| 270233 | 5711743 | 1.2 | 1   | 0.2 |     |     |     |
| 270233 | 5711743 | 2.2 | 0.8 | 0.2 |     |     |     |
| 270233 | 5711743 | 1.3 | 0.7 | 0.5 |     |     |     |
| 270233 | 5711743 | 1.2 | 0.8 | 0.5 |     |     |     |
| 270233 | 5711743 | 1.9 | 0.7 | 0.4 |     |     |     |

|        |         |     |     |     |     |     |     |
|--------|---------|-----|-----|-----|-----|-----|-----|
| 270233 | 5711743 | 1.3 | 1.2 | 0.4 |     |     |     |
| 270233 | 5711743 | 1.3 | 0.5 | 0.5 |     |     |     |
| 270394 | 5712910 | 2.5 | 1.5 | 1   | 1.9 | 1.2 | 0.8 |
| 270394 | 5712910 | 3   | 1.5 | 1   |     |     |     |
| 270394 | 5712910 | 3   | 1   | 0.8 |     |     |     |
| 270394 | 5712910 | 1.5 | 1   | 0.7 |     |     |     |
| 270394 | 5712910 | 1   | 0.7 | 0.5 |     |     |     |
| 270394 | 5712910 | 1.2 | 1.1 | 1   |     |     |     |
| 270394 | 5712910 | 1.5 | 1   | 0.8 |     |     |     |
| 270394 | 5712910 | 2   | 1.5 | 0.7 |     |     |     |
| 270394 | 5712910 | 1.5 | 1   | 0.5 |     |     |     |
| 270394 | 5712910 | 1   | 1   | 0.5 |     |     |     |
| 270394 | 5712910 | 3   | 1.5 | 1   |     |     |     |
| 270394 | 5712910 | 1.5 | 1.3 | 1   |     |     |     |
| 270423 | 5712432 | 3   | 2   | 1   | 2.9 | 2.2 | 1.1 |
| 270423 | 5712432 | 3   | 2   | 1.1 |     |     |     |
| 270423 | 5712432 | 3   | 3   | 1   |     |     |     |
| 270423 | 5712432 | 3   | 2.5 | 1.5 |     |     |     |
| 270423 | 5712432 | 3   | 2.5 | 1   |     |     |     |
| 270423 | 5712432 | 2   | 1.8 | 1   |     |     |     |
| 270423 | 5712432 | 2.5 | 2   | 1.2 |     |     |     |
| 270423 | 5712432 | 3.2 | 2.1 | 0.8 |     |     |     |
| 270423 | 5712432 | 3   | 3   | 1   |     |     |     |
| 270423 | 5712432 | 3.2 | 2   | 1.5 |     |     |     |
| 270423 | 5712432 | 3.2 | 1.6 | 1   |     |     |     |
| 270423 | 5712432 | 2.5 | 2   | 1   |     |     |     |
| 270438 | 5714593 | 2.5 | 2   | 0.7 | 2.8 | 1.6 | 0.9 |
| 270438 | 5714593 | 3   | 2   | 0.8 |     |     |     |
| 270438 | 5714593 | 3   | 1.5 | 1   |     |     |     |
| 270438 | 5714593 | 2   | 1.5 | 0.8 |     |     |     |
| 270438 | 5714593 | 2.5 | 1   | 0.9 |     |     |     |

|        |         |     |     |     |     |     |     |
|--------|---------|-----|-----|-----|-----|-----|-----|
| 270438 | 5714593 | 2   | 1   | 1   |     |     |     |
| 270438 | 5714593 | 3.5 | 2   | 1   |     |     |     |
| 270438 | 5714593 | 5   | 2   | 1   |     |     |     |
| 270438 | 5714593 | 3   | 2   | 1   |     |     |     |
| 270438 | 5714593 | 2.5 | 1.5 | 0.8 |     |     |     |
| 270438 | 5714593 | 2.5 | 1.2 | 1   |     |     |     |
| 270438 | 5714593 | 2.5 | 1   | 0.8 |     |     |     |
| 270573 | 5714484 | 3.2 | 1   | 1   | 2.9 | 1.6 | 0.9 |
| 270573 | 5714484 | 2.5 | 2.5 | 0.8 |     |     |     |
| 270573 | 5714484 | 3.5 | 2   | 1.5 |     |     |     |
| 270573 | 5714484 | 4   | 2   | 1   |     |     |     |
| 270573 | 5714484 | 2.5 | 1.2 | 1   |     |     |     |
| 270573 | 5714484 | 2   | 1   | 0.8 |     |     |     |
| 270573 | 5714484 | 3.5 | 1.5 | 1   |     |     |     |
| 270573 | 5714484 | 2.6 | 1   | 0.6 |     |     |     |
| 270573 | 5714484 | 3   | 2.5 | 0.8 |     |     |     |
| 270573 | 5714484 | 2.5 | 2   | 0.8 |     |     |     |
| 270573 | 5714484 | 3   | 1.5 | 1   |     |     |     |
| 270573 | 5714484 | 2.5 | 1.5 | 0.6 |     |     |     |
| 270577 | 5711305 | 4   | 2.9 | 0.5 | 2.8 | 2.1 | 0.7 |
| 270577 | 5711305 | 2.4 | 2.2 | 0.9 |     |     |     |
| 270577 | 5711305 | 3.2 | 2.4 | 1   |     |     |     |
| 270577 | 5711305 | 3.4 | 2.3 | 0.7 |     |     |     |
| 270577 | 5711305 | 3   | 2.4 | 0.7 |     |     |     |
| 270577 | 5711305 | 2.3 | 1.3 | 0.3 |     |     |     |
| 270577 | 5711305 | 2.5 | 1.2 | 0.6 |     |     |     |
| 270577 | 5711305 | 2.4 | 2.1 | 1   |     |     |     |
| 270577 | 5711305 | 1.5 | 1.4 | 0.5 |     |     |     |
| 270577 | 5711305 | 3.5 | 2.6 | 1   |     |     |     |
| 270585 | 5714725 | 5   | 2.5 | 1   | 3.2 | 1.8 | 1.0 |
| 270585 | 5714725 | 5   | 1.5 | 0.8 |     |     |     |



|        |         |     |     |     |     |     |     |
|--------|---------|-----|-----|-----|-----|-----|-----|
| 270585 | 5714725 | 3   | 1.5 | 0.8 |     |     |     |
| 270585 | 5714725 | 2   | 1.5 | 0.8 |     |     |     |
| 270585 | 5714725 | 2   | 1.5 | 1   |     |     |     |
| 270585 | 5714725 | 3   | 2   | 1   |     |     |     |
| 270585 | 5714725 | 2.5 | 1   | 0.8 |     |     |     |
| 270585 | 5714725 | 3.5 | 3.5 | 2   |     |     |     |
| 270585 | 5714725 | 3   | 2.5 | 1   |     |     |     |
| 270585 | 5714725 | 3.5 | 2.5 | 0.8 |     |     |     |
| 270585 | 5714725 | 2.5 | 1.5 | 0.7 |     |     |     |
| 270585 | 5714725 | 3   | 1.5 | 0.8 |     |     |     |
| 270585 | 5714725 | 3   | 1   | 1   |     |     |     |
|        |         |     |     |     |     |     |     |
| 270653 | 5712937 | 8.4 | 7.5 | 4.0 | 4.8 | 3.9 | 2.7 |
| 270653 | 5712937 | 6.3 | 4.7 | 3.5 |     |     |     |
| 270653 | 5712937 | 6.2 | 5.0 | 3.0 |     |     |     |
| 270653 | 5712937 | 5.5 | 5.7 | 2.4 |     |     |     |
| 270653 | 5712937 | 4.7 | 3.5 | 2.8 |     |     |     |
| 270653 | 5712937 | 4.5 | 3.0 | 1.7 |     |     |     |
| 270653 | 5712937 | 4.5 | 3.0 | 2.2 |     |     |     |
| 270653 | 5712937 | 4.5 | 3.4 | 4.1 |     |     |     |
| 270653 | 5712937 | 4.5 | 3.7 | 3.0 |     |     |     |
| 270653 | 5712937 | 4.4 | 3.6 | 3.0 |     |     |     |
| 270653 | 5712937 | 4.2 | 4.7 | 3.0 |     |     |     |
| 270653 | 5712937 | 4.0 | 3.2 | 2.8 |     |     |     |
| 270653 | 5712937 | 3.8 | 3.4 | 1.3 |     |     |     |
| 270653 | 5712937 | 3.0 | 2.1 | 2.0 |     |     |     |
| 270653 | 5712937 | 3.0 | 2.6 | 2.2 |     |     |     |
|        |         |     |     |     |     |     |     |
| 270658 | 5712266 | 3   | 1.5 | 1   | 3.5 | 2.2 | 1.0 |
| 270658 | 5712266 | 5   | 3   | 1   |     |     |     |
| 270658 | 5712266 | 3.5 | 2   | 1.5 |     |     |     |
| 270658 | 5712266 | 3.5 | 1.5 | 0.8 |     |     |     |
| 270658 | 5712266 | 3   | 2.2 | 0.9 |     |     |     |
| 270658 | 5712266 | 3   | 2.2 | 0.6 |     |     |     |

|        |         |     |     |     |     |     |     |
|--------|---------|-----|-----|-----|-----|-----|-----|
| 270658 | 5712266 | 4   | 2   | 1   |     |     |     |
| 270658 | 5712266 | 4   | 3   | 1   |     |     |     |
| 270658 | 5712266 | 3   | 2   | 1   |     |     |     |
| 270658 | 5712266 | 4   | 2.5 | 1   |     |     |     |
| 270658 | 5712266 | 3   | 2.8 | 1   |     |     |     |
| 270658 | 5712266 | 2.8 | 2.1 | 1   |     |     |     |
| 270668 | 5713960 | 1.5 | 1   | 0.6 | 1.8 | 1.2 | 0.7 |
| 270668 | 5713960 | 1.9 | 1.8 | 0.9 |     |     |     |
| 270668 | 5713960 | 1.6 | 1.5 | 1   |     |     |     |
| 270668 | 5713960 | 3.1 | 2.2 | 1.5 |     |     |     |
| 270668 | 5713960 | 4.1 | 2.2 | 0.6 |     |     |     |
| 270668 | 5713960 | 2   | 1.2 | 1.2 |     |     |     |
| 270693 | 5713963 | 2   | 1.2 | 1   |     |     |     |
| 270693 | 5713963 | 1.5 | 1   | 0.5 |     |     |     |
| 270693 | 5713963 | 1.5 | 1   | 0.5 |     |     |     |
| 270693 | 5713963 | 2   | 1   | 0.9 |     |     |     |
| 270693 | 5713963 | 1.5 | 1   | 0.5 |     |     |     |
| 270693 | 5713963 | 0.6 | 0.6 | 0.4 |     |     |     |
| 270693 | 5713963 | 0.7 | 0.6 | 0.4 |     |     |     |
| 270693 | 5713963 | 1.7 | 0.5 | 0.2 |     |     |     |
| 270742 | 5711658 | 1.8 | 0.5 | 0.4 | 1.6 | 1.1 | 0.5 |
| 270742 | 5711658 | 1.5 | 1   | 0.5 |     |     |     |
| 270742 | 5711658 | 1.4 | 1   | 0.5 |     |     |     |
| 270742 | 5711658 | 2.5 | 2   | 1   |     |     |     |
| 270742 | 5711658 | 1.4 | 1   | 0.7 |     |     |     |
| 270742 | 5711658 | 2   | 1.5 | 0.5 |     |     |     |
| 270742 | 5711658 | 1.5 | 1   | 0.5 |     |     |     |
| 270742 | 5711658 | 1.4 | 1   | 0.5 |     |     |     |
| 270742 | 5711658 | 1.7 | 0.7 | 0.5 |     |     |     |
| 270742 | 5711658 | 1.5 | 1   | 0.3 |     |     |     |
| 270742 | 5711658 | 1   | 0.9 | 0.6 |     |     |     |
| 270742 | 5711658 | 1.5 | 1   | 0.5 |     |     |     |

|        |         |     |     |     |     |     |     |
|--------|---------|-----|-----|-----|-----|-----|-----|
| 270840 | 5714316 | 4   | 3   | 1   | 2.3 | 1.4 | 0.9 |
| 270840 | 5714316 | 2   | 1.5 | 1   |     |     |     |
| 270840 | 5714316 | 2   | 1.8 | 1   |     |     |     |
| 270840 | 5714316 | 2.5 | 1   | 0.8 |     |     |     |
| 270840 | 5714316 | 2   | 1.2 | 0.5 |     |     |     |
| 270840 | 5714316 | 1.5 | 1   | 1   |     |     |     |
| 270840 | 5714316 | 2.5 | 1   | 1   |     |     |     |
| 270840 | 5714316 | 2.5 | 1   | 0.8 |     |     |     |
| 270840 | 5714316 | 3   | 1.5 | 1   |     |     |     |
| 270840 | 5714316 | 2   | 1   | 1   |     |     |     |
| 270840 | 5714316 | 2   | 1   | 0.5 |     |     |     |
| 270840 | 5714316 | 2   | 2   | 1   |     |     |     |
| 270854 | 5713260 | 2.3 | 2.1 | 1.3 | 1.9 | 1.3 | 0.8 |
| 270854 | 5713260 | 1.9 | 1   | 0.7 |     |     |     |
| 270854 | 5713260 | 1   | 0.7 | 0.4 |     |     |     |
| 270854 | 5713260 | 3.4 | 2.3 | 0.6 |     |     |     |
| 270854 | 5713260 | 2.3 | 2.1 | 1   |     |     |     |
| 270854 | 5713260 | 2.4 | 1.4 | 1.4 |     |     |     |
| 270854 | 5713260 | 1.7 | 1   | 0.4 |     |     |     |
| 270854 | 5713260 | 1.4 | 0.7 | 0.5 |     |     |     |
| 270854 | 5713260 | 1.5 | 0.6 | 0.4 |     |     |     |
| 270854 | 5713260 | 1.3 | 0.7 | 0.4 |     |     |     |
| 270854 | 5713260 | 2   | 1.4 | 1.2 |     |     |     |
| 270854 | 5713260 | 1.8 | 1.4 | 1   |     |     |     |
| 270873 | 5712882 | 2   | 1.5 | 1   | 1.8 | 1.2 | 0.9 |
| 270873 | 5712882 | 1   | 1   | 0.2 |     |     |     |
| 270873 | 5712882 | 2   | 1   | 1   |     |     |     |
| 270873 | 5712882 | 2   | 1.2 | 1   |     |     |     |
| 270873 | 5712882 | 1.6 | 0.5 | 0.3 |     |     |     |
| 270873 | 5712882 | 1   | 0.8 | 0.3 |     |     |     |
| 270873 | 5712882 | 1.5 | 1.5 | 1   |     |     |     |

|        |         |     |     |     |     |     |     |
|--------|---------|-----|-----|-----|-----|-----|-----|
| 270873 | 5712882 | 3   | 2   | 2   |     |     |     |
| 270873 | 5712882 | 1.3 | 1   | 0.8 |     |     |     |
| 270873 | 5712882 | 1.5 | 1   | 1   |     |     |     |
| 270873 | 5712882 | 3   | 2   | 1   |     |     |     |
| 270873 | 5712882 | 1.5 | 1   | 0.8 |     |     |     |
| 270883 | 5712042 | 4   | 3.2 | 1   | 3.5 | 2.3 | 1.1 |
| 270883 | 5712042 | 3.5 | 2.5 | 1   |     |     |     |
| 270883 | 5712042 | 5   | 3   | 1   |     |     |     |
| 270883 | 5712042 | 3   | 2.2 | 1   |     |     |     |
| 270883 | 5712042 | 3.1 | 2.1 | 1   |     |     |     |
| 270883 | 5712042 | 3   | 1.8 | 1   |     |     |     |
| 270883 | 5712042 | 5   | 3.5 | 1.2 |     |     |     |
| 270883 | 5712042 | 3.2 | 2   | 1   |     |     |     |
| 270883 | 5712042 | 4.2 | 2   | 1.2 |     |     |     |
| 270883 | 5712042 | 3.5 | 2.5 | 1.2 |     |     |     |
| 270883 | 5712042 | 2.5 | 1.5 | 1   |     |     |     |
| 270883 | 5712042 | 2   | 1.5 | 1   |     |     |     |
| 270920 | 5714758 | 5   | 3   | 2   | 4.0 | 2.5 | 1.4 |
| 270920 | 5714758 | 4   | 3   | 1   |     |     |     |
| 270920 | 5714758 | 4   | 2   | 2   |     |     |     |
| 270920 | 5714758 | 3.5 | 2   | 1.5 |     |     |     |
| 270920 | 5714758 | 5   | 4   | 1   |     |     |     |
| 270920 | 5714758 | 3.5 | 2.2 | 1   |     |     |     |
| 270920 | 5714758 | 5   | 3.5 | 2.5 |     |     |     |
| 270920 | 5714758 | 4   | 2   | 1.5 |     |     |     |
| 270920 | 5714758 | 3   | 1.5 | 1   |     |     |     |
| 270920 | 5714758 | 3   | 2   | 1   |     |     |     |
| 270920 | 5714758 | 4   | 2   | 1   |     |     |     |
| 270920 | 5714758 | 3.5 | 2.5 | 1.5 |     |     |     |
| 271067 | 5714345 | 3   | 2   | 1.5 | 2.4 | 1.3 | 0.8 |
| 271067 | 5714345 | 3   | 1   | 1   |     |     |     |

|        |         |     |     |     |     |     |     |
|--------|---------|-----|-----|-----|-----|-----|-----|
| 271067 | 5714345 | 3   | 2   | 1   |     |     |     |
| 271067 | 5714345 | 2   | 1.5 | 1   |     |     |     |
| 271067 | 5714345 | 2   | 1.5 | 0.6 |     |     |     |
| 271067 | 5714345 | 2   | 1   | 1   |     |     |     |
| 271067 | 5714345 | 3   | 1   | 0.5 |     |     |     |
| 271067 | 5714345 | 3   | 0.8 | 0.8 |     |     |     |
| 271067 | 5714345 | 3   | 1.2 | 0.3 |     |     |     |
| 271067 | 5714345 | 2   | 1.5 | 0.5 |     |     |     |
| 271067 | 5714345 | 2   | 0.8 | 0.6 |     |     |     |
| 271067 | 5714345 | 1   | 1   | 1   |     |     |     |
| 271084 | 5713646 | 7.0 | 4.6 | 3.7 | 4.4 | 3.4 | 2.6 |
| 271084 | 5713646 | 5.6 | 3.5 | 3.2 |     |     |     |
| 271084 | 5713646 | 5.0 | 4.1 | 2.2 |     |     |     |
| 271084 | 5713646 | 4.3 | 4.0 | 2.8 |     |     |     |
| 271084 | 5713646 | 5.0 | 3.6 | 2.4 |     |     |     |
| 271084 | 5713646 | 4.6 | 3.4 | 2.9 |     |     |     |
| 271084 | 5713646 | 4.2 | 4.2 | 2.2 |     |     |     |
| 271084 | 5713646 | 4.6 | 3.1 | 2.8 |     |     |     |
| 271084 | 5713646 | 4.0 | 3.5 | 2.3 |     |     |     |
| 271084 | 5713646 | 3.4 | 3.2 | 2.8 |     |     |     |
| 271084 | 5713646 | 4.1 | 3.1 | 2.1 |     |     |     |
| 271084 | 5713646 | 3.9 | 3.3 | 2.0 |     |     |     |
| 271084 | 5713646 | 4.0 | 3.0 | 1.5 |     |     |     |
| 271084 | 5713646 | 3.2 | 2.0 | 3.1 |     |     |     |
| 271084 | 5713646 | 3.6 | 2.1 | 2.4 |     |     |     |
| 271115 | 5711857 | 5   | 3.2 | 1.5 | 3.3 | 2.1 | 1.2 |
| 271115 | 5711857 | 3.2 | 2.8 | 2   |     |     |     |
| 271115 | 5711857 | 4.2 | 2   | 1.3 |     |     |     |
| 271115 | 5711857 | 3   | 2   | 1   |     |     |     |
| 271115 | 5711857 | 3   | 2   | 0.8 |     |     |     |
| 271115 | 5711857 | 2.5 | 2   | 1   |     |     |     |
| 271115 | 5711857 | 3.5 | 2   | 1.5 |     |     |     |

|        |         |     |     |     |     |     |     |
|--------|---------|-----|-----|-----|-----|-----|-----|
| 271115 | 5711857 | 4.5 | 2.5 | 2   |     |     |     |
| 271115 | 5711857 | 3   | 2   | 1   |     |     |     |
| 271115 | 5711857 | 3   | 1.5 | 1.2 |     |     |     |
| 271115 | 5711857 | 2   | 2   | 1   |     |     |     |
| 271115 | 5711857 | 2.5 | 1.5 | 0.6 |     |     |     |
| 271199 | 5714002 | 2.2 | 1.2 | 0.8 | 2.0 | 1.5 | 0.9 |
| 271199 | 5714002 | 2   | 2   | 1   |     |     |     |
| 271199 | 5714002 | 1.5 | 1   | 0.8 |     |     |     |
| 271200 | 5713997 | 3.4 | 2.6 | 1.5 |     |     |     |
| 271200 | 5713997 | 1.7 | 1.3 | 0.8 |     |     |     |
| 271200 | 5713997 | 1.6 | 1   | 0.6 |     |     |     |
| 271200 | 5713997 | 1.2 | 0.9 | 0.7 |     |     |     |
| 271200 | 5713997 | 2.5 | 1.8 | 1.2 |     |     |     |
| 271200 | 5713997 | 1.8 | 1.7 | 0.8 |     |     |     |
| 271200 | 5713997 | 2   | 1.4 | 0.7 |     |     |     |
| 271200 | 5713997 | 1.9 | 1.7 | 1.1 |     |     |     |
| 271206 | 5714743 | 4.5 | 2   | 0.5 | 3.5 | 2.1 | 1.1 |
| 271206 | 5714743 | 3   | 2   | 1.4 |     |     |     |
| 271206 | 5714743 | 3.5 | 2.5 | 1   |     |     |     |
| 271206 | 5714743 | 3   | 2   | 1   |     |     |     |
| 271206 | 5714743 | 3   | 1.5 | 1   |     |     |     |
| 271206 | 5714743 | 3   | 1   | 1   |     |     |     |
| 271206 | 5714743 | 4   | 2.5 | 1   |     |     |     |
| 271206 | 5714743 | 3.5 | 2.5 | 1.5 |     |     |     |
| 271206 | 5714743 | 4   | 3   | 1.5 |     |     |     |
| 271206 | 5714743 | 4   | 2   | 1   |     |     |     |
| 271206 | 5714743 | 2.5 | 2.5 | 1   |     |     |     |
| 271206 | 5714743 | 4   | 2   | 1.5 |     |     |     |
| 271236 | 5711558 | 1.5 | 1   | 0.5 | 1.6 | 0.9 | 0.5 |
| 271236 | 5711558 | 1.5 | 1.2 | 0.4 |     |     |     |
| 271236 | 5711558 | 1.8 | 0.7 | 0.5 |     |     |     |

|        |         |     |     |     |     |     |     |
|--------|---------|-----|-----|-----|-----|-----|-----|
| 271236 | 5711558 | 2.5 | 1   | 0.5 |     |     |     |
| 271236 | 5711558 | 1.7 | 1.5 | 0.7 |     |     |     |
| 271236 | 5711558 | 2   | 0.8 | 0.4 |     |     |     |
| 271236 | 5711558 | 1.2 | 0.5 | 0.5 |     |     |     |
| 271236 | 5711558 | 1.7 | 0.7 | 0.3 |     |     |     |
| 271236 | 5711558 | 1.6 | 0.6 | 0.3 |     |     |     |
| 271236 | 5711558 | 1.5 | 1   | 1   |     |     |     |
| 271236 | 5711558 | 1   | 1   | 0.8 |     |     |     |
| 271236 | 5711558 | 1.5 | 0.7 | 0.5 |     |     |     |
|        |         |     |     |     |     |     |     |
| 271237 | 5712325 | 6.0 | 5.1 | 3.4 | 4.5 | 3.4 | 2.4 |
| 271237 | 5712325 | 5.9 | 3.8 | 3.0 |     |     |     |
| 271237 | 5712325 | 4.9 | 4.3 | 3.0 |     |     |     |
| 271237 | 5712325 | 4.5 | 3.2 | 3.5 |     |     |     |
| 271237 | 5712325 | 4.7 | 4.2 | 1.9 |     |     |     |
| 271237 | 5712325 | 5.2 | 3.2 | 2.0 |     |     |     |
| 271237 | 5712325 | 4.5 | 3.1 | 2.6 |     |     |     |
| 271237 | 5712325 | 5.0 | 3.6 | 1.4 |     |     |     |
| 271237 | 5712325 | 3.2 | 2.7 | 4.1 |     |     |     |
| 271237 | 5712325 | 4.0 | 3.5 | 2.4 |     |     |     |
| 271237 | 5712325 | 3.8 | 3.5 | 2.0 |     |     |     |
| 271237 | 5712325 | 4.0 | 2.7 | 2.4 |     |     |     |
| 271237 | 5712325 | 4.0 | 2.8 | 2.3 |     |     |     |
| 271237 | 5712325 | 3.9 | 2.9 | 1.3 |     |     |     |
| 271237 | 5712325 | 4.0 | 2.9 | 0.7 |     |     |     |
|        |         |     |     |     |     |     |     |
| 271259 | 5712864 | 3.5 | 2.5 | 1   | 1.9 | 1.3 | 0.8 |
| 271259 | 5712864 | 2   | 1.5 | 1   |     |     |     |
| 271259 | 5712864 | 1   | 1   | 0.8 |     |     |     |
| 271259 | 5712864 | 2   | 1.5 | 1   |     |     |     |
| 271259 | 5712864 | 2   | 1   | 0.7 |     |     |     |
| 271259 | 5712864 | 2   | 0.5 | 0.2 |     |     |     |
| 271259 | 5712864 | 1   | 1   | 0.5 |     |     |     |
| 271259 | 5712864 | 1.5 | 1   | 0.8 |     |     |     |

|        |         |     |     |     |     |     |     |
|--------|---------|-----|-----|-----|-----|-----|-----|
| 271259 | 5712864 | 3.5 | 2   | 1   |     |     |     |
| 271259 | 5712864 | 1.5 | 1   | 0.8 |     |     |     |
| 271259 | 5712864 | 2   | 1.5 | 1   |     |     |     |
| 271259 | 5712864 | 1   | 0.5 | 0.3 |     |     |     |
| 271360 | 5714325 | 5   | 3   | 1.5 | 3.3 | 1.9 | 1.1 |
| 271360 | 5714325 | 3   | 2   | 1   |     |     |     |
| 271360 | 5714325 | 2.5 | 1.5 | 0.8 |     |     |     |
| 271360 | 5714325 | 3   | 2   | 1   |     |     |     |
| 271360 | 5714325 | 3.5 | 1.5 | 1   |     |     |     |
| 271360 | 5714325 | 3   | 2   | 0.8 |     |     |     |
| 271360 | 5714325 | 4   | 3   | 1   |     |     |     |
| 271360 | 5714325 | 2.5 | 1   | 1   |     |     |     |
| 271360 | 5714325 | 3   | 2   | 1.2 |     |     |     |
| 271360 | 5714325 | 2.5 | 1.5 | 1   |     |     |     |
| 271360 | 5714325 | 4   | 1.5 | 1.5 |     |     |     |
| 271360 | 5714325 | 3.5 | 2   | 1.5 |     |     |     |
| 271366 | 5711656 | 5   | 3.5 | 1.5 | 3.3 | 2.3 | 1.0 |
| 271366 | 5711656 | 4.5 | 3   | 0.5 |     |     |     |
| 271366 | 5711656 | 3.5 | 2.5 | 0.5 |     |     |     |
| 271366 | 5711656 | 2.6 | 2   | 1   |     |     |     |
| 271366 | 5711656 | 2.5 | 2   | 1   |     |     |     |
| 271366 | 5711656 | 2.5 | 2   | 1   |     |     |     |
| 271366 | 5711656 | 3   | 3   | 1.5 |     |     |     |
| 271366 | 5711656 | 4   | 2.5 | 1.5 |     |     |     |
| 271366 | 5711656 | 3.5 | 2   | 1.5 |     |     |     |
| 271366 | 5711656 | 3   | 2   | 0.6 |     |     |     |
| 271366 | 5711656 | 3   | 2   | 0.5 |     |     |     |
| 271366 | 5711656 | 2   | 1.5 | 0.8 |     |     |     |
| 271375 | 5712877 | 5.8 | 3.5 | 2.4 | 3.9 | 2.9 | 2.2 |
| 271375 | 5712877 | 5.7 | 2.7 | 1.6 |     |     |     |
| 271375 | 5712877 | 5.0 | 3.2 | 2.7 |     |     |     |



|        |         |     |     |     |     |     |     |
|--------|---------|-----|-----|-----|-----|-----|-----|
| 271375 | 5712877 | 4.4 | 3.0 | 1.6 |     |     |     |
| 271375 | 5712877 | 4.2 | 3.5 | 3.2 |     |     |     |
| 271375 | 5712877 | 4.0 | 3.0 | 2.5 |     |     |     |
| 271375 | 5712877 | 3.8 | 2.8 | 2.0 |     |     |     |
| 271375 | 5712877 | 3.7 | 3.0 | 3.0 |     |     |     |
| 271375 | 5712877 | 3.6 | 2.4 | 1.8 |     |     |     |
| 271375 | 5712877 | 3.5 | 2.7 | 2.0 |     |     |     |
| 271375 | 5712877 | 3.5 | 2.0 | 1.6 |     |     |     |
| 271375 | 5712877 | 3.3 | 3.0 | 2.4 |     |     |     |
| 271375 | 5712877 | 3.1 | 2.5 | 1.5 |     |     |     |
| 271375 | 5712877 | 2.7 | 3.5 | 2.3 |     |     |     |
| 271375 | 5712877 | 2.7 | 2.4 | 2.8 |     |     |     |
|        |         |     |     |     |     |     |     |
| 271430 | 5714766 | 3.2 | 2   | 1.5 | 3.0 | 1.8 | 1.0 |
| 271430 | 5714766 | 4   | 4   | 2   |     |     |     |
| 271430 | 5714766 | 3   | 1.5 | 0.5 |     |     |     |
| 271430 | 5714766 | 2.5 | 2   | 1.5 |     |     |     |
| 271430 | 5714766 | 2   | 1   | 0.8 |     |     |     |
| 271430 | 5714766 | 2   | 1   | 0.5 |     |     |     |
| 271430 | 5714766 | 4   | 1.5 | 1   |     |     |     |
| 271430 | 5714766 | 5   | 2.5 | 1   |     |     |     |
| 271430 | 5714766 | 4   | 2   | 1   |     |     |     |
| 271430 | 5714766 | 3   | 1.5 | 0.8 |     |     |     |
| 271430 | 5714766 | 2   | 1   | 1   |     |     |     |
| 271430 | 5714766 | 1.5 | 1   | 0.8 |     |     |     |
|        |         |     |     |     |     |     |     |
| 271686 | 5712927 | 4   | 2   | 1   | 2.3 | 1.7 | 1.0 |
| 271686 | 5712927 | 4   | 3   | 2   |     |     |     |
| 271686 | 5712927 | 2   | 2   | 1   |     |     |     |
| 271686 | 5712927 | 2.5 | 1.5 | 0.7 |     |     |     |
| 271686 | 5712927 | 2   | 1.5 | 1   |     |     |     |
| 271686 | 5712927 | 2   | 2   | 0.9 |     |     |     |
| 271686 | 5712927 | 2   | 1.5 | 1   |     |     |     |
| 271686 | 5712927 | 2.5 | 2   | 1   |     |     |     |

|        |         |                |     |     |     |     |     |
|--------|---------|----------------|-----|-----|-----|-----|-----|
| 271686 | 5712927 | 2.5            | 1.5 | 1   |     |     |     |
| 271686 | 5712927 | 1.5            | 1   | 0.8 |     |     |     |
| 271686 | 5712927 | 2              | 1.5 | 0.8 |     |     |     |
| 271686 | 5712927 | 1.5            | 1   | 1   |     |     |     |
| 271686 | 5712927 | 1.5            | 1   | 0.8 |     |     |     |
| 271702 | 5714709 | 3.5            | 2   | 1   | 3.6 | 1.7 | 1.0 |
| 271702 | 5714709 | 4              | 2.5 | 1.5 |     |     |     |
| 271702 | 5714709 | 3.5            | 2   | 1   |     |     |     |
| 271702 | 5714709 | 2.5            | 2   | 1.2 |     |     |     |
| 271702 | 5714709 | 3.5            | 1   | 0.5 |     |     |     |
| 271702 | 5714709 | 4              | 1.5 | 1   |     |     |     |
| 271702 | 5714709 | 3.5            | 2   | 1.5 |     |     |     |
| 271702 | 5714709 | 4              | 1   | 0.7 |     |     |     |
| 271702 | 5714709 | 3.5            | 1.5 | 1   |     |     |     |
| 271797 | 5711737 | 7.6            | 4.3 | 2.7 | 4.7 | 3.3 | 2.0 |
| 271797 | 5711737 | 5.7            | 4.8 | 2.2 |     |     |     |
| 271797 | 5711737 | 5.0            | 3.7 | 3.3 |     |     |     |
| 271797 | 5711737 | 5.0            | 3.9 | 2.9 |     |     |     |
| 271797 | 5711737 | 5.2            | 3.4 | 2.4 |     |     |     |
| 271797 | 5711737 | 4.4            | 3.2 | 3.1 |     |     |     |
| 271797 | 5711737 | 4.2            | 3.9 | 2.2 |     |     |     |
| 271797 | 5711737 | 5.0            | 3.4 | 1.7 |     |     |     |
| 271797 | 5711737 | 4.4            | 3.1 | 2.4 |     |     |     |
| 271797 | 5711737 | 5.0            | 2.7 | 1.8 |     |     |     |
| 271797 | 5711737 | 4.0            | 3.5 | 1.6 |     |     |     |
| 271797 | 5711737 | 5.0            | 3.3 | 0.6 |     |     |     |
| 271797 | 5711737 | 3.6            | 3.2 | 1.4 |     |     |     |
| 271797 | 5711737 | 4.2            | 2.3 | 1.7 |     |     |     |
| 271797 | 5711737 | 3.9            | 2.2 | 1.6 |     |     |     |
| 271797 | 5711737 | 3.2            | 2.4 | 0.8 |     |     |     |
| 271835 | 5714019 | first detected |     |     |     |     |     |

|        |         |     |     |     |     |     |     |
|--------|---------|-----|-----|-----|-----|-----|-----|
| 271885 | 5714568 | 5   | 3   | 1.5 | 3.3 | 2.1 | 1.3 |
| 271885 | 5714568 | 4   | 2.5 | 1.5 |     |     |     |
| 271885 | 5714568 | 3.2 | 2.5 | 2   |     |     |     |
| 271885 | 5714568 | 3   | 2   | 0.8 |     |     |     |
| 271885 | 5714568 | 3   | 2   | 1.5 |     |     |     |
| 271885 | 5714568 | 2.5 | 1.5 | 0.8 |     |     |     |
| 271885 | 5714568 | 3.2 | 2.5 | 1.5 |     |     |     |
| 271885 | 5714568 | 4   | 2   | 1.6 |     |     |     |
| 271885 | 5714568 | 3   | 2   | 1   |     |     |     |
| 271885 | 5714568 | 3.5 | 2   | 1   |     |     |     |
| 271885 | 5714568 | 2.5 | 1   | 0.8 |     |     |     |
| 271885 | 5714568 | 2.5 | 2   | 1   |     |     |     |
| 271898 | 5712972 | 1.5 | 1.5 | 0.8 | 1.9 | 1.3 | 1.0 |
| 271898 | 5712972 | 2   | 1   | 1   |     |     |     |
| 271898 | 5712972 | 2   | 1.5 | 1   |     |     |     |
| 271898 | 5712972 | 2   | 1   | 1   |     |     |     |
| 271903 | 5711298 | 3.5 | 1.5 | 0.5 | 2.6 | 1.5 | 0.6 |
| 271903 | 5711298 | 3   | 2.3 | 0.8 |     |     |     |
| 271903 | 5711298 | 3   | 2   | 0.5 |     |     |     |
| 271903 | 5711298 | 3   | 1   | 0.8 |     |     |     |
| 271903 | 5711298 | 2.5 | 1.5 | 1   |     |     |     |
| 271903 | 5711298 | 4   | 2.5 | 0.5 |     |     |     |
| 271903 | 5711298 | 2   | 1   | 0.5 |     |     |     |
| 271903 | 5711298 | 2   | 1   | 0.5 |     |     |     |
| 271903 | 5711298 | 2.5 | 1.2 | 0.6 |     |     |     |
| 271903 | 5711298 | 2   | 1.5 | 0.5 |     |     |     |
| 271903 | 5711298 | 2   | 1   | 0.5 |     |     |     |
| 271903 | 5711298 | 2   | 1   | 1   |     |     |     |
| 271914 | 5713011 | 3   | 1.5 | 0.5 | 2.1 | 1.4 | 0.9 |
| 271914 | 5713011 | 2   | 1.5 | 0.8 |     |     |     |

|        |         |                 |     |     |     |     |     |
|--------|---------|-----------------|-----|-----|-----|-----|-----|
| 271914 | 5713011 | 1.8             | 1.2 | 0.6 |     |     |     |
| 271915 | 5713012 | 3               | 2.4 | 1.9 |     |     |     |
| 271915 | 5713012 | 3.2             | 1.2 | 1.1 |     |     |     |
| 271915 | 5713012 | 1.2             | 1.2 | 0.9 |     |     |     |
| 271915 | 5713012 | 2               | 1.4 | 0.7 |     |     |     |
| 271915 | 5713012 | 1.6             | 1.3 | 0.6 |     |     |     |
| 271915 | 5713012 | 2.8             | 1   | 0.5 |     |     |     |
| 271915 | 5713012 | 1.2             | 1   | 0.7 |     |     |     |
| 271915 | 5713012 | 1.5             | 1.3 | 1.3 |     |     |     |
| 271915 | 5713012 | 2.1             | 1.7 | 1.2 |     |     |     |
| 271962 | 5711120 | southern extent |     |     |     |     |     |
| 271965 | 5711469 | 1.9             | 1.8 | 0.9 | 2.2 | 1.7 | 1.0 |
| 271965 | 5711469 | 1.7             | 1.3 | 1   |     |     |     |
| 271965 | 5711469 | 1.9             | 1.6 | 1.1 |     |     |     |
| 271965 | 5711469 | 2               | 1.6 | 1.1 |     |     |     |
| 271965 | 5711469 | 2.7             | 1.8 | 1.2 |     |     |     |
| 271965 | 5711469 | 2.8             | 2.4 | 1.1 |     |     |     |
| 271965 | 5711469 | 2.4             | 2.3 | 1.1 |     |     |     |
| 271965 | 5711469 | 2               | 1.9 | 1.3 |     |     |     |
| 271965 | 5711469 | 2.3             | 2.2 | 1   |     |     |     |
| 271965 | 5711469 | 2.3             | 1   | 0.6 |     |     |     |
| 271965 | 5711469 | 2.5             | 1.6 | 0.7 |     |     |     |
| 271965 | 5711469 | 1.8             | 1   | 0.8 |     |     |     |
| 271992 | 5713863 | 3.7             | 2.8 | 1.8 | 2.8 | 2.0 | 1.0 |
| 271992 | 5713863 | 3.9             | 2.7 | 1.4 |     |     |     |
| 271992 | 5713863 | 2.8             | 2.7 | 0.9 |     |     |     |
| 271992 | 5713863 | 2.7             | 2   | 0.6 |     |     |     |
| 271992 | 5713863 | 2.4             | 1.8 | 1   |     |     |     |
| 271992 | 5713863 | 2               | 1.4 | 1   |     |     |     |
| 271992 | 5713863 | 3.1             | 1.3 | 0.6 |     |     |     |
| 271992 | 5713863 | 2.4             | 1.7 | 1.1 |     |     |     |

|        |         |          |     |     |     |     |     |
|--------|---------|----------|-----|-----|-----|-----|-----|
| 271992 | 5713863 | 3.1      | 2.3 | 1.1 |     |     |     |
| 271992 | 5713863 | 2        | 1.1 | 1   |     |     |     |
| 271992 | 5713863 | 3.5      | 2.5 | 0.8 |     |     |     |
| 271992 | 5713863 | 3        | 2   | 0.8 |     |     |     |
| 271992 | 5713863 | 2        | 2   | 1.5 |     |     |     |
| 271992 | 5713863 | 3        | 1.5 | 1   |     |     |     |
| 271998 | 5712985 | 4.4      | 3.5 | 3.3 | 3.5 | 2.7 | 2.1 |
| 271998 | 5712985 | 4.3      | 2.5 | 2.5 |     |     |     |
| 271998 | 5712985 | 4.2      | 3.6 | 2.5 |     |     |     |
| 271998 | 5712985 | 4.0      | 2.7 | 2.4 |     |     |     |
| 271998 | 5712985 | 4.0      | 2.1 | 2.0 |     |     |     |
| 271998 | 5712985 | 3.8      | 3.0 | 1.9 |     |     |     |
| 271998 | 5712985 | 3.8      | 3.0 | 3.7 |     |     |     |
| 271998 | 5712985 | 3.5      | 3.0 | 1.1 |     |     |     |
| 271998 | 5712985 | 3.4      | 2.7 | 2.0 |     |     |     |
| 271998 | 5712985 | 3.0      | 2.6 | 2.0 |     |     |     |
| 271998 | 5712985 | 3.0      | 2.2 | 1.7 |     |     |     |
| 271998 | 5712985 | 2.7      | 2.5 | 1.1 |     |     |     |
| 271998 | 5712985 | 2.6      | 2.4 | 0.8 |     |     |     |
| 271998 | 5712985 | 2.6      | 2.8 | 2.7 |     |     |     |
| 271998 | 5712985 | 2.5      | 2.2 | 1.9 |     |     |     |
| 271998 | 5713606 | no brown |     |     |     |     |     |
| 271998 | 5713606 | 3        | 2   | 1   | 3.2 | 1.8 | 0.9 |
| 271998 | 5713606 | 4        | 2   | 1   |     |     |     |
| 271998 | 5713606 | 3        | 2   | 1.4 |     |     |     |
| 271998 | 5713606 | 4        | 2   | 1   |     |     |     |
| 271998 | 5713606 | 3        | 1   | 0.5 |     |     |     |
| 271998 | 5713606 | 2.5      | 1.5 | 0.5 |     |     |     |
| 271998 | 5713606 | 4        | 2   | 1.4 |     |     |     |
| 271998 | 5713606 | 4        | 2.5 | 1   |     |     |     |
| 271998 | 5713606 | 3        | 2   | 1   |     |     |     |

|        |         |     |     |     |     |     |     |
|--------|---------|-----|-----|-----|-----|-----|-----|
| 271998 | 5713606 | 1.5 | 1   | 1   |     |     |     |
| 271998 | 5713606 | 3.2 | 2   | 0.5 |     |     |     |
| 272013 | 5711169 | 2   | 1.2 | 0.8 | 1.9 | 1.4 | 0.9 |
| 272013 | 5711169 | 1.1 | 1   | 0.6 |     |     |     |
| 272013 | 5711169 | 1.8 | 1.1 | 0.5 |     |     |     |
| 272013 | 5711169 | 1.6 | 1.1 | 0.6 |     |     |     |
| 272013 | 5711170 | 3.3 | 2.8 | 1.9 |     |     |     |
| 272013 | 5711170 | 2.5 | 1.9 | 1.6 |     |     |     |
| 272013 | 5711170 | 2.2 | 1.7 | 1   |     |     |     |
| 272013 | 5711170 | 1.3 | 1.2 | 1.2 |     |     |     |
| 272013 | 5711170 | 1.6 | 1   | 0.6 |     |     |     |
| 272013 | 5711170 | 2.5 | 1.5 | 0.6 |     |     |     |
| 272013 | 5711170 | 1.6 | 1   | 0.7 |     |     |     |
| 272013 | 5711170 | 1.2 | 1   | 0.5 |     |     |     |
| 272033 | 5711865 | 1.6 | 1.4 | 0.7 | 2.4 | 1.6 | 1.0 |
| 272033 | 5711865 | 2.3 | 2.1 | 0.8 |     |     |     |
| 272033 | 5711865 | 1.8 | 1.3 | 1   |     |     |     |
| 272033 | 5711865 | 2.2 | 1.7 | 0.9 |     |     |     |
| 272033 | 5711865 | 3.5 | 2.7 | 1.7 |     |     |     |
| 272033 | 5711865 | 1.8 | 1.4 | 0.9 |     |     |     |
| 272033 | 5711865 | 2.7 | 1.5 | 0.9 |     |     |     |
| 272033 | 5711865 | 1.6 | 1.4 | 1.1 |     |     |     |
| 272033 | 5711865 | 3   | 1.9 | 1.5 |     |     |     |
| 272033 | 5711865 | 3.5 | 1   | 0.6 |     |     |     |
| 272033 | 5711865 | 1.8 | 1.7 | 1   |     |     |     |
| 272033 | 5711865 | 2.5 | 1   | 0.4 |     |     |     |
| 272048 | 5713228 | 5   | 3.2 | 1.4 | 2.8 | 1.9 | 1.0 |
| 272048 | 5713228 | 3.4 | 2.9 | 1.5 |     |     |     |
| 272048 | 5713228 | 3.5 | 2.1 | 1.7 |     |     |     |
| 272048 | 5713228 | 3.2 | 1.8 | 1.1 |     |     |     |
| 272048 | 5713228 | 2.3 | 1.4 | 0.8 |     |     |     |

|        |         |                 |     |     |     |     |     |
|--------|---------|-----------------|-----|-----|-----|-----|-----|
| 272048 | 5713228 | 2.5             | 1.5 | 0.9 |     |     |     |
| 272048 | 5713228 | 2.2             | 1.4 | 0.5 |     |     |     |
| 272048 | 5713228 | 3               | 2   | 1   |     |     |     |
| 272048 | 5713228 | 3               | 2.1 | 0.6 |     |     |     |
| 272048 | 5713228 | 2.5             | 2   | 1   |     |     |     |
| 272048 | 5713228 | 2               | 2   | 1   |     |     |     |
| 272048 | 5713228 | 2               | 1.5 | 1   |     |     |     |
| 272048 | 5713228 | 3.2             | 1.5 | 1   |     |     |     |
| 272048 | 5713228 | 2.1             | 1.5 | 1   |     |     |     |
| 272048 | 5713228 | 3               | 1.5 | 1   |     |     |     |
| 272048 | 5713228 | 1.5             | 1.5 | 1.2 |     |     |     |
|        |         |                 |     |     |     |     |     |
| 272061 | 5714213 | 2.8             | 1.4 | 0.7 | 3.5 | 2.0 | 1.1 |
| 272061 | 5714213 | 6               | 3   | 1   |     |     |     |
| 272061 | 5714213 | 3.5             | 2   | 1   |     |     |     |
| 272061 | 5714213 | 3               | 2   | 1   |     |     |     |
| 272061 | 5714213 | 3               | 2   | 1   |     |     |     |
| 272061 | 5714213 | 3.5             | 2.5 | 2   |     |     |     |
| 272061 | 5714213 | 4.5             | 2   | 2   |     |     |     |
| 272061 | 5714213 | 3               | 1.5 | 1   |     |     |     |
| 272061 | 5714213 | 2.5             | 1.5 | 0.5 |     |     |     |
|        |         |                 |     |     |     |     |     |
| 272065 | 5714800 | northern extent |     |     |     |     |     |
|        |         |                 |     |     |     |     |     |
| 272072 | 5712758 | 3.8             | 3.2 | 2   | 2.6 | 1.7 | 1.2 |
| 272072 | 5712758 | 2.5             | 1.5 | 1.2 |     |     |     |
| 272072 | 5712758 | 2.5             | 2.2 | 1.7 |     |     |     |
| 272072 | 5712758 | 2.3             | 1.7 | 1.2 |     |     |     |
| 272072 | 5712758 | 3.5             | 2.5 | 2.1 |     |     |     |
| 272072 | 5712758 | 2               | 1.6 | 0.8 |     |     |     |
| 272072 | 5712758 | 2.3             | 1.8 | 1.5 |     |     |     |
| 272072 | 5712758 | 1.7             | 1.1 | 0.7 |     |     |     |
| 272072 | 5712758 | 1.4             | 1.3 | 1.2 |     |     |     |
| 272072 | 5712758 | 4               | 0.6 | 0.5 |     |     |     |

|        |         |     |     |     |     |     |     |
|--------|---------|-----|-----|-----|-----|-----|-----|
| 272072 | 5712758 | 2.8 | 1.8 | 0.8 |     |     |     |
| 272072 | 5712758 | 1.8 | 1   | 0.9 |     |     |     |
| 272117 | 5712433 | 5.5 | 4.3 | 3.3 | 4.8 | 3.4 | 2.5 |
| 272117 | 5712433 | 4.5 | 4.0 | 3.6 |     |     |     |
| 272117 | 5712433 | 5.0 | 4.7 | 2.3 |     |     |     |
| 272117 | 5712433 | 4.7 | 3.7 | 3.5 |     |     |     |
| 272117 | 5712433 | 5.1 | 3.5 | 3.2 |     |     |     |
| 272117 | 5712433 | 4.9 | 3.5 | 3.0 |     |     |     |
| 272117 | 5712433 | 5.2 | 3.5 | 2.0 |     |     |     |
| 272117 | 5712433 | 5.2 | 3.2 | 2.0 |     |     |     |
| 272117 | 5712433 | 4.1 | 3.0 | 3.2 |     |     |     |
| 272117 | 5712433 | 5.0 | 3.4 | 1.7 |     |     |     |
| 272117 | 5712433 | 4.7 | 3.2 | 2.1 |     |     |     |
| 272117 | 5712433 | 4.3 | 3.1 | 2.2 |     |     |     |
| 272117 | 5712433 | 4.2 | 3.7 | 1.7 |     |     |     |
| 272117 | 5712433 | 5.0 | 2.4 | 1.8 |     |     |     |
| 272117 | 5712433 | 4.3 | 2.5 | 2.3 |     |     |     |
| 272131 | 5714881 | 3   | 1.5 | 1   | 2.2 | 1.4 | 0.9 |
| 272131 | 5714881 | 2.3 | 2   | 0.8 |     |     |     |
| 272131 | 5714881 | 2   | 1.5 | 1   |     |     |     |
| 272131 | 5714881 | 2.6 | 2   | 1.5 |     |     |     |
| 272131 | 5714881 | 2   | 1.5 | 1   |     |     |     |
| 272131 | 5714881 | 2   | 1   | 0.5 |     |     |     |
| 272131 | 5714881 | 2.5 | 1   | 0.8 |     |     |     |
| 272131 | 5714881 | 2.5 | 1   | 0.5 |     |     |     |
| 272131 | 5714881 | 2   | 1.5 | 1   |     |     |     |
| 272131 | 5714881 | 2   | 1   | 1   |     |     |     |
| 272131 | 5714881 | 2   | 1   | 1   |     |     |     |
| 272131 | 5714881 | 1.5 | 1.2 | 0.8 |     |     |     |
| 272138 | 5713771 | 4.7 | 4.6 | 4.4 | 4.6 | 3.3 | 2.2 |
| 272138 | 5713771 | 7.6 | 3.4 | 2.2 |     |     |     |



|        |         |     |     |     |     |     |     |
|--------|---------|-----|-----|-----|-----|-----|-----|
| 272138 | 5713771 | 5.5 | 5.0 | 2.2 |     |     |     |
| 272138 | 5713771 | 5.5 | 3.3 | 1.8 |     |     |     |
| 272138 | 5713771 | 3.6 | 3.7 | 2.9 |     |     |     |
| 272138 | 5713771 | 4.9 | 3.6 | 1.7 |     |     |     |
| 272138 | 5713771 | 4.3 | 3.6 | 2.1 |     |     |     |
| 272138 | 5713771 | 4.2 | 3.4 | 2.2 |     |     |     |
| 272138 | 5713771 | 4.7 | 3.4 | 1.4 |     |     |     |
| 272138 | 5713771 | 4.2 | 3.3 | 1.9 |     |     |     |
| 272138 | 5713771 | 4.0 | 3.2 | 2.0 |     |     |     |
| 272138 | 5713771 | 4.9 | 2.3 | 1.9 |     |     |     |
| 272138 | 5713771 | 3.7 | 2.9 | 2.0 |     |     |     |
| 272138 | 5713771 | 3.2 | 2.4 | 2.2 |     |     |     |
| 272138 | 5713771 | 3.6 | 2.1 | 1.9 |     |     |     |
|        |         |     |     |     |     |     |     |
| 272162 | 5714624 | 3.5 | 2   | 1   | 2.8 | 1.7 | 1.1 |
| 272162 | 5714624 | 3   | 2   | 1   |     |     |     |
| 272162 | 5714624 | 2   | 1.5 | 1   |     |     |     |
| 272162 | 5714624 | 2.5 | 2   | 1   |     |     |     |
| 272162 | 5714624 | 2   | 1   | 0.8 |     |     |     |
| 272162 | 5714624 | 2   | 1   | 1   |     |     |     |
| 272162 | 5714624 | 4.5 | 1.5 | 1   |     |     |     |
| 272162 | 5714624 | 4.5 | 2.5 | 2   |     |     |     |
| 272162 | 5714624 | 2.5 | 2   | 1   |     |     |     |
| 272162 | 5714624 | 2.5 | 2   | 1   |     |     |     |
| 272162 | 5714624 | 2.2 | 1.5 | 1   |     |     |     |
| 272162 | 5714624 | 2.5 | 1   | 1   |     |     |     |
|        |         |     |     |     |     |     |     |
| 272167 | 5713046 | 3   | 2.9 | 1.7 | 2.5 | 1.9 | 1.4 |
| 272167 | 5713046 | 3.2 | 1.9 | 1.8 |     |     |     |
| 272167 | 5713046 | 2.6 | 2   | 1.5 |     |     |     |
| 272167 | 5713046 | 2.2 | 1.6 | 1   |     |     |     |
| 272167 | 5713046 | 4.2 | 3   | 2.5 |     |     |     |
| 272167 | 5713046 | 3   | 2.7 | 2.5 |     |     |     |
| 272167 | 5713046 | 2.6 | 2.4 | 0.8 |     |     |     |

|        |         |     |     |     |     |     |     |
|--------|---------|-----|-----|-----|-----|-----|-----|
| 272167 | 5713046 | 1.7 | 1.5 | 1.2 |     |     |     |
| 272167 | 5713046 | 2   | 1.5 | 1.2 |     |     |     |
| 272167 | 5713046 | 2.1 | 1.5 | 0.7 |     |     |     |
| 272167 | 5713046 | 2.2 | 1   | 0.8 |     |     |     |
| 272167 | 5713046 | 1.5 | 1.2 | 0.6 |     |     |     |
| 272173 | 5714471 | 2.2 | 1.2 | 1   | 2.2 | 1.2 | 1.0 |
| 272173 | 5714471 | 2   | 1   | 1   |     |     |     |
| 272173 | 5714471 | 2   | 1   | 0.8 |     |     |     |
| 272173 | 5714471 | 2   | 1   | 1   |     |     |     |
| 272173 | 5714471 | 2   | 1.2 | 1   |     |     |     |
| 272173 | 5714471 | 2   | 1   | 0.8 |     |     |     |
| 272173 | 5714471 | 2   | 1   | 1   |     |     |     |
| 272173 | 5714471 | 2   | 1   | 1   |     |     |     |
| 272173 | 5714471 | 2   | 1   | 0.8 |     |     |     |
| 272173 | 5714471 | 2.8 | 2   | 1.5 |     |     |     |
| 272173 | 5714471 | 2   | 1   | 0.8 |     |     |     |
| 272173 | 5714471 | 2.8 | 2   | 1.5 |     |     |     |
| 272173 | 5714471 | 2   | 1   | 0.8 |     |     |     |
| 272173 | 5714471 | 2.3 | 1.5 | 1   |     |     |     |
| 272188 | 5712331 | 2.9 | 2.6 | 1.6 | 2.6 | 1.7 | 1.2 |
| 272188 | 5712331 | 2.9 | 2.4 | 2   |     |     |     |
| 272188 | 5712331 | 3.4 | 1.7 | 1.4 |     |     |     |
| 272188 | 5712331 | 2   | 1   | 1   |     |     |     |
| 272188 | 5712331 | 3.4 | 2.9 | 1.6 |     |     |     |
| 272188 | 5712331 | 2.6 | 1.6 | 1   |     |     |     |
| 272188 | 5712331 | 2.5 | 1.6 | 1.5 |     |     |     |
| 272188 | 5712331 | 1.9 | 1.7 | 1.1 |     |     |     |
| 272188 | 5712331 | 3.2 | 1.6 | 1   |     |     |     |
| 272188 | 5712331 | 2.6 | 0.9 | 0.4 |     |     |     |
| 272188 | 5712331 | 2.2 | 2   | 1   |     |     |     |
| 272188 | 5712331 | 1.7 | 0.6 | 0.5 |     |     |     |

| Easting | Northing | Major (cm)        | Intermediate (cm) | Minor (cm) | Average | Major (cm) | Intermediate (cm) | Minor (cm) |
|---------|----------|-------------------|-------------------|------------|---------|------------|-------------------|------------|
| 267683  | 5714231  | sparse new scoria |                   |            |         |            |                   |            |
| 267794  | 5714052  | 11.9              | 9.0               | 0.2        |         | 7.6        | 5.7               | 0.3        |
| 267794  | 5714052  | 10.0              | 8.1               | 0.2        |         |            |                   |            |
| 267794  | 5714052  | 8.9               | 5.5               | 0.3        |         |            |                   |            |
| 267794  | 5714052  | 8.5               | 5.8               | 0.3        |         |            |                   |            |
| 267794  | 5714052  | 7.5               | 6.4               | 0.3        |         |            |                   |            |
| 267794  | 5714052  | 7.1               | 5.6               | 0.4        |         |            |                   |            |
| 267794  | 5714052  | 7.0               | 5.9               | 0.3        |         |            |                   |            |
| 267794  | 5714052  | 6.8               | 5.3               | 0.4        |         |            |                   |            |
| 267794  | 5714052  | 6.4               | 4.0               | 0.4        |         |            |                   |            |
| 267794  | 5714052  | 6.1               | 4.2               | 0.4        |         |            |                   |            |
| 267794  | 5714052  | 6.0               | 5.3               | 0.4        |         |            |                   |            |
| 267794  | 5714052  | 5.2               | 3.6               | 0.3        |         |            |                   |            |
| 267921  | 5714560  | no new scoria     |                   |            |         |            |                   |            |
| 268009  | 5713603  | 14.6              | 11.2              | 0.3        |         | 8.9        | 6.5               | 0.4        |
| 268009  | 5713603  | 11.2              | 7.3               | 0.3        |         |            |                   |            |
| 268009  | 5713603  | 10.0              | 5.4               | 0.4        |         |            |                   |            |
| 268009  | 5713603  | 9.6               | 5.7               | 0.3        |         |            |                   |            |
| 268009  | 5713603  | 9.6               | 4.3               | 0.3        |         |            |                   |            |
| 268009  | 5713603  | 9.4               | 8.0               | 0.2        |         |            |                   |            |
| 268009  | 5713603  | 9.4               | 7.0               | 0.5        |         |            |                   |            |
| 268009  | 5713603  | 9.0               | 5.1               | 0.5        |         |            |                   |            |
| 268009  | 5713603  | 8.3               | 9.7               | 0.5        |         |            |                   |            |
| 268009  | 5713603  | 8.1               | 7.0               | 0.4        |         |            |                   |            |
| 268009  | 5713603  | 8.0               | 7.2               | 0.5        |         |            |                   |            |
| 268009  | 5713603  | 7.1               | 5.6               | 0.4        |         |            |                   |            |
| 268009  | 5713603  | 7.0               | 5.5               | 0.3        |         |            |                   |            |
| 268009  | 5713603  | 6.4               | 4.3               | 0.4        |         |            |                   |            |
| 268009  | 5713603  | 5.6               | 4.5               | 0.4        |         |            |                   |            |

|        |         |           |      |     |     |     |     |
|--------|---------|-----------|------|-----|-----|-----|-----|
| 268058 | 5712453 | 3.8       | 2.6  | 0.2 | 3.1 | 2.2 | 0.2 |
| 268058 | 5712453 | 2.8       | 2.6  | 0.2 |     |     |     |
| 268058 | 5712453 | 2.6       | 1.5  | 0.3 |     |     |     |
| 268154 | 5713170 | 7         | 6.3  | 0.4 | 4.3 | 3.5 | 0.4 |
| 268154 | 5713170 | 4         | 3.1  | 0.3 |     |     |     |
| 268154 | 5713170 | 4.1       | 3.2  | 0.4 |     |     |     |
| 268154 | 5713170 | 3.6       | 3    | 0.5 |     |     |     |
| 268154 | 5713170 | 4.2       | 2.6  | 0.6 |     |     |     |
| 268154 | 5713170 | 3         | 3    | 0.4 |     |     |     |
| 268235 | 5713143 | 2.8       | 2.1  | 0.5 | 2.3 | 1.8 | 0.4 |
| 268235 | 5713143 | 2.1       | 1.9  | 0.4 |     |     |     |
| 268235 | 5713143 | 2.4       | 1.4  | 0.4 |     |     |     |
| 268235 | 5713143 | 1.2       | 1.1  | 0.4 |     |     |     |
| 268235 | 5713143 | 1.5       | 1.1  | 0.5 |     |     |     |
| 268235 | 5713143 | 1.4       | 1.2  | 0.4 |     |     |     |
| 268235 | 5713143 | 4.5       | 4    | 0.5 |     |     |     |
| 268273 | 5714005 | no plates |      |     |     |     |     |
| 268507 | 5712209 | no plates |      |     |     |     |     |
| 268545 | 5712895 | 9.0       | 6.8  | 0.3 | 9.0 | 7.4 | 0.3 |
| 268545 | 5712895 | 7.0       | 5.2  | 0.3 |     |     |     |
| 268545 | 5712895 | 11.0      | 10.2 | 0.4 |     |     |     |
| 268772 | 5713657 | 10.9      | 7.1  | 0.2 | 6.6 | 5.0 | 0.4 |
| 268772 | 5713657 | 8.7       | 5.6  | 0.3 |     |     |     |
| 268772 | 5713657 | 7.6       | 7.7  | 0.4 |     |     |     |
| 268772 | 5713657 | 6.8       | 5.9  | 0.8 |     |     |     |
| 268772 | 5713657 | 6.7       | 4.3  | 0.8 |     |     |     |
| 268772 | 5713657 | 6.6       | 4.8  | 0.4 |     |     |     |
| 268772 | 5713657 | 6.5       | 4.1  | 0.3 |     |     |     |

|        |         |     |     |     |     |     |     |
|--------|---------|-----|-----|-----|-----|-----|-----|
| 268772 | 5713657 | 5.5 | 5.0 | 0.3 |     |     |     |
| 268772 | 5713657 | 5.3 | 3.3 | 0.3 |     |     |     |
| 268772 | 5713657 | 4.2 | 2.2 | 0.4 |     |     |     |
| 268772 | 5713657 | 3.5 | 4.6 | 0.2 |     |     |     |
| 269003 | 5713728 | 3.5 | 2.1 | 0.3 | 3.1 | 2.3 | 0.4 |
| 269003 | 5713728 | 2.2 | 1.4 | 0.2 |     |     |     |
| 269003 | 5713728 | 3   | 2.6 | 0.2 |     |     |     |
| 269003 | 5713728 | 4.9 | 3.5 | 0.7 |     |     |     |
| 269003 | 5713728 | 2.5 | 2.3 | 0.5 |     |     |     |
| 269003 | 5713728 | 2.1 | 1.7 | 0.2 |     |     |     |
| 269014 | 5712036 | 4.4 | 2.5 | 0.5 |     |     |     |
| 269014 | 5712036 | 2.3 | 2.2 | 0.3 |     |     |     |
| 269014 | 5712036 | 3.1 | 2.8 | 0.3 |     |     |     |
| 269236 | 5712696 | 5.5 | 3.8 | 0.3 | 3.6 | 2.3 | 0.3 |
| 269236 | 5712696 | 2.5 | 1.8 | 0.3 |     |     |     |
| 269236 | 5712696 | 4.3 | 1.6 | 0.3 |     |     |     |
| 269236 | 5712696 | 3.5 | 1.9 | 0.3 |     |     |     |
| 269236 | 5712696 | 3   | 2.4 | 0.2 |     |     |     |
| 269236 | 5712696 | 2.5 | 2   | 0.3 |     |     |     |
| 269240 | 5713221 | 2.6 | 1.4 | 0.3 | 2.3 | 1.5 | 0.2 |
| 269240 | 5713221 | 2   | 2   | 0.2 |     |     |     |
| 269240 | 5713221 | 2.2 | 1.2 | 0.2 |     |     |     |
| 269334 | 5712684 | 6.3 | 3.2 | 0.5 | 4.5 | 3.3 | 0.3 |
| 269334 | 5712684 | 5.7 | 3.5 | 0.2 |     |     |     |
| 269334 | 5712684 | 5.5 | 4.4 | 0.3 |     |     |     |
| 269334 | 5712684 | 5.0 | 4.3 | 0.4 |     |     |     |
| 269334 | 5712684 | 4.5 | 3.0 | 0.2 |     |     |     |
| 269334 | 5712684 | 4.5 | 3.1 | 0.3 |     |     |     |
| 269334 | 5712684 | 4.2 | 3.5 | 0.3 |     |     |     |
| 269334 | 5712684 | 4.1 | 2.5 | 0.3 |     |     |     |

|        |         |           |     |     |     |     |     |
|--------|---------|-----------|-----|-----|-----|-----|-----|
| 269334 | 5712684 | 3.8       | 4.0 | 0.3 |     |     |     |
| 269334 | 5712684 | 3.7       | 2.9 | 0.3 |     |     |     |
| 269334 | 5712684 | 3.5       | 2.4 | 0.3 |     |     |     |
| 269334 | 5712684 | 3.0       | 2.5 | 0.3 |     |     |     |
| 269342 | 5713103 | 7.9       | 6.0 | 0.5 | 5.2 | 3.8 | 0.3 |
| 269342 | 5713103 | 7.5       | 5.4 | 0.7 |     |     |     |
| 269342 | 5713103 | 6.4       | 4.6 | 0.3 |     |     |     |
| 269342 | 5713103 | 6.2       | 4.5 | 0.3 |     |     |     |
| 269342 | 5713103 | 6.0       | 3.5 | 0.4 |     |     |     |
| 269342 | 5713103 | 5.5       | 4.0 | 0.4 |     |     |     |
| 269342 | 5713103 | 5.4       | 4.6 | 0.3 |     |     |     |
| 269342 | 5713103 | 4.5       | 4.2 | 0.3 |     |     |     |
| 269342 | 5713103 | 4.4       | 3.6 | 0.4 |     |     |     |
| 269342 | 5713103 | 4.2       | 2.6 | 0.2 |     |     |     |
| 269342 | 5713103 | 4.2       | 3.0 | 0.2 |     |     |     |
| 269342 | 5713103 | 4.0       | 4.0 | 0.2 |     |     |     |
| 269342 | 5713103 | 3.8       | 2.2 | 0.2 |     |     |     |
| 269342 | 5713103 | 3.7       | 2.0 | 0.2 |     |     |     |
| 269342 | 5713103 | 3.6       | 3.0 | 0.3 |     |     |     |
| 269367 | 5713965 | no plates |     |     |     |     |     |
| 269373 | 5713613 | 2.9       | 2.2 | 0.5 | 3.9 | 3.5 | 0.9 |
| 269373 | 5713613 | 4.9       | 4.7 | 1.2 |     |     |     |
| 269439 | 5711714 | no plates |     |     |     |     |     |
| 269457 | 5713012 | 4         | 2   | 0.3 | 3.8 | 1.4 | 0.3 |
| 269457 | 5713012 | 3.5       | 0.8 | 0.2 |     |     |     |
| 269636 | 5713969 | no plates |     |     |     |     |     |
| 269734 | 5712110 | 4.5       | 3   | 0.3 | 3.1 | 2.2 | 0.3 |

|        |         |      |     |     |     |     |     |
|--------|---------|------|-----|-----|-----|-----|-----|
| 269734 | 5712110 | 2.7  | 2   | 0.2 |     |     |     |
| 269734 | 5712110 | 2.5  | 1.7 | 0.3 |     |     |     |
| 269734 | 5712110 | 2.5  | 1.9 | 0.4 |     |     |     |
| 269827 | 5713004 | 11.4 | 7.0 | 0.2 | 6.2 | 4.3 | 0.3 |
| 269827 | 5713004 | 9.4  | 4.6 | 0.3 |     |     |     |
| 269827 | 5713004 | 8.1  | 3.5 | 0.3 |     |     |     |
| 269827 | 5713004 | 8.0  | 6.0 | 0.4 |     |     |     |
| 269827 | 5713004 | 5.9  | 4.1 | 0.3 |     |     |     |
| 269827 | 5713004 | 5.6  | 3.5 | 0.4 |     |     |     |
| 269827 | 5713004 | 5.6  | 4.2 | 0.4 |     |     |     |
| 269827 | 5713004 | 5.5  | 6.1 | 0.3 |     |     |     |
| 269827 | 5713004 | 5.2  | 3.7 | 0.3 |     |     |     |
| 269827 | 5713004 | 5.2  | 4.0 | 0.3 |     |     |     |
| 269827 | 5713004 | 5.0  | 3.7 | 0.3 |     |     |     |
| 269827 | 5713004 | 5.0  | 3.5 | 0.2 |     |     |     |
| 269827 | 5713004 | 4.6  | 3.6 | 0.3 |     |     |     |
| 269827 | 5713004 | 4.5  | 4.0 | 0.4 |     |     |     |
| 269827 | 5713004 | 4.3  | 2.8 | 0.3 |     |     |     |
| 269998 | 5713659 | 2    | 1.5 | 1   | 2   | 1.5 | 1   |
| 270099 | 5713477 | 3.6  | 2.4 | 0.5 | 3.0 | 2.2 | 0.4 |
| 270099 | 5713477 | 2.4  | 2   | 0.2 |     |     |     |
| 270182 | 5712432 | 4    | 3.5 | 0.2 | 4   | 3.5 | 0.2 |
| 270185 | 5713957 | 1.8  | 1.3 | 0.3 | 2.0 | 1.6 | 0.4 |
| 270185 | 5713957 | 2    | 1.8 | 0.5 |     |     |     |
| 270185 | 5713957 | 1.8  | 1.4 | 0.3 |     |     |     |
| 270185 | 5713957 | 2.5  | 2   | 0.5 |     |     |     |
| 270185 | 5713957 | 2.5  | 1.5 | 0.3 |     |     |     |
| 270185 | 5713957 | 1.5  | 1.3 | 0.2 |     |     |     |

|        |         |           |     |     |     |     |     |
|--------|---------|-----------|-----|-----|-----|-----|-----|
| 270233 | 5711743 | 1.9       | 1.2 | 0.3 | 1.8 | 1.3 | 0.2 |
| 270233 | 5711743 | 2         | 1.7 | 0.3 |     |     |     |
| 270233 | 5711743 | 1.5       | 1.5 | 0.2 |     |     |     |
| 270233 | 5711743 | 1.9       | 1.3 | 0.3 |     |     |     |
| 270233 | 5711743 | 1.6       | 1.2 | 0.2 |     |     |     |
| 270233 | 5711743 | 1.6       | 1.2 | 0.2 |     |     |     |
| 270233 | 5711743 | 1.9       | 1.2 | 0.2 |     |     |     |
| 270394 | 5712910 | 3.5       | 2.5 | 0.3 | 2.1 | 1.4 | 0.2 |
| 270394 | 5712910 | 3         | 2   | 0.3 |     |     |     |
| 270394 | 5712910 | 2         | 1.5 | 0.2 |     |     |     |
| 270423 | 5712432 | 2         | 2   | 0.2 |     |     |     |
| 270438 | 5714593 | 2         | 1   | 0.2 |     |     |     |
| 270438 | 5714593 | 2         | 1   | 0.3 |     |     |     |
| 270438 | 5714593 | 2         | 0.6 | 0.2 |     |     |     |
| 270438 | 5714593 | 1.5       | 0.6 | 0.2 |     |     |     |
| 270573 | 5714484 | 2         | 1.5 | 0.2 |     |     |     |
| 270573 | 5714484 | 2         | 1.5 | 0.2 |     |     |     |
| 270573 | 5714484 | 1.5       | 1   | 0.2 |     |     |     |
| 270577 | 5711305 | no plates |     |     |     |     |     |
| 270653 | 5712937 | 9.2       | 4.1 | 0.4 | 6.2 | 4.4 | 0.3 |
| 270653 | 5712937 | 8.0       | 5.7 | 0.2 |     |     |     |
| 270653 | 5712937 | 7.5       | 6.5 | 0.3 |     |     |     |
| 270653 | 5712937 | 7.3       | 3.0 | 0.5 |     |     |     |
| 270653 | 5712937 | 7.0       | 4.5 | 0.2 |     |     |     |
| 270653 | 5712937 | 7.0       | 3.2 | 0.3 |     |     |     |
| 270653 | 5712937 | 6.5       | 6.4 | 0.2 |     |     |     |
| 270653 | 5712937 | 6.2       | 4.0 | 0.2 |     |     |     |
| 270653 | 5712937 | 6.2       | 4.2 | 0.4 |     |     |     |
| 270653 | 5712937 | 6.0       | 6.5 | 0.5 |     |     |     |
| 270653 | 5712937 | 5.9       | 3.0 | 0.2 |     |     |     |
| 270653 | 5712937 | 4.9       | 4.7 | 0.4 |     |     |     |



|        |         |     |     |     |     |     |     |
|--------|---------|-----|-----|-----|-----|-----|-----|
| 270653 | 5712937 | 4.5 | 3.0 | 0.2 |     |     |     |
| 270653 | 5712937 | 4.2 | 4.0 | 0.4 |     |     |     |
| 270653 | 5712937 | 2.7 | 2.9 | 0.3 |     |     |     |
| 270658 | 5712266 | 2   | 1.5 | 0.1 | 2.3 | 1.5 | 0.2 |
| 270658 | 5712266 | 2.5 | 1.5 | 0.2 |     |     |     |
| 270668 | 5713960 | 2.6 | 2.4 | 1   | 2.6 | 2.0 | 0.8 |
| 270668 | 5713960 | 2.2 | 1.9 | 0.5 |     |     |     |
| 270668 | 5713960 | 2.7 | 2.5 | 1.1 |     |     |     |
| 270668 | 5713960 | 3.2 | 1.9 | 0.4 |     |     |     |
| 270693 | 5713963 | 2.4 | 1.3 | 1   |     |     |     |
| 270742 | 5711658 | 2   | 2   | 0.3 | 1.9 | 1.5 | 0.3 |
| 270742 | 5711658 | 1.8 | 1.6 | 0.5 |     |     |     |
| 270742 | 5711658 | 2.5 | 1.7 | 0.4 |     |     |     |
| 270742 | 5711658 | 1.8 | 1.2 | 0.2 |     |     |     |
| 270742 | 5711658 | 1.5 | 1   | 0.3 |     |     |     |
| 270840 | 5714316 | 2.8 | 1.6 | 0.2 | 2.7 | 1.6 | 0.3 |
| 270840 | 5714316 | 2.5 | 1.5 | 0.3 |     |     |     |
| 270854 | 5713260 | 2.5 | 2.3 | 0.5 | 2.4 | 1.7 | 0.4 |
| 270854 | 5713260 | 2.7 | 2.4 | 0.7 |     |     |     |
| 270854 | 5713260 | 1.8 | 1.4 | 0.2 |     |     |     |
| 270854 | 5713260 | 1.8 | 1.4 | 0.2 |     |     |     |
| 270854 | 5713260 | 1.6 | 1.4 | 0.5 |     |     |     |
| 270854 | 5713260 | 3.7 | 1.8 | 0.5 |     |     |     |
| 270854 | 5713260 | 3.9 | 3   | 1   |     |     |     |
| 270854 | 5713260 | 3   | 2.2 | 0.6 |     |     |     |
| 270854 | 5713260 | 2.5 | 1.4 | 0.2 |     |     |     |
| 270854 | 5713260 | 1.6 | 0.8 | 0.2 |     |     |     |
| 270854 | 5713260 | 1.5 | 1   | 0.2 |     |     |     |

|        |         |     |     |     |     |     |     |
|--------|---------|-----|-----|-----|-----|-----|-----|
| 270883 | 5712042 | 2.5 | 1.5 | 0.2 | 2.7 | 1.8 | 0.2 |
| 270883 | 5712042 | 3   | 2   | 0.3 |     |     |     |
| 270883 | 5712042 | 3.2 | 2.2 | 0.2 |     |     |     |
| 271067 | 5714345 | 3.5 | 2.5 | 0.2 |     |     |     |
| 271067 | 5714345 | 2.5 | 1.5 | 0.2 |     |     |     |
| 271067 | 5714345 | 1.6 | 1.2 | 0.2 |     |     |     |
| 271084 | 5713646 | 6.0 | 4.6 | 0.4 | 4.1 | 3.4 | 0.3 |
| 271084 | 5713646 | 4.3 | 3.3 | 0.2 |     |     |     |
| 271084 | 5713646 | 4.1 | 3.8 | 0.2 |     |     |     |
| 271084 | 5713646 | 4.0 | 3.2 | 0.2 |     |     |     |
| 271084 | 5713646 | 3.2 | 3.6 | 0.6 |     |     |     |
| 271084 | 5713646 | 3.2 | 1.9 | 0.2 |     |     |     |
| 271115 | 5711857 | 2.5 | 2   | 0.2 | 2.8 | 2.5 | 0.2 |
| 271115 | 5711857 | 3   | 3   | 0.2 |     |     |     |
| 271236 | 5711558 | 2   | 1.5 | 0.3 | 1.8 | 1.4 | 0.3 |
| 271236 | 5711558 | 1.5 | 1.3 | 0.3 |     |     |     |
| 271237 | 5712325 | 5.3 | 4.5 | 0.3 | 3.6 | 3.3 | 0.2 |
| 271237 | 5712325 | 3.9 | 3.0 | 0.2 |     |     |     |
| 271237 | 5712325 | 3.6 | 3.6 | 0.3 |     |     |     |
| 271237 | 5712325 | 3.5 | 3.6 | 0.3 |     |     |     |
| 271237 | 5712325 | 3.2 | 3.9 | 0.2 |     |     |     |
| 271237 | 5712325 | 3.1 | 2.5 | 0.2 |     |     |     |
| 271237 | 5712325 | 3.0 | 3.3 | 0.2 |     |     |     |
| 271237 | 5712325 | 2.9 | 2.2 | 0.2 |     |     |     |
| 271360 | 5714325 | 3   | 1.8 | 0.2 | 2.9 | 1.2 | 0.2 |
| 271360 | 5714325 | 3.5 | 0.5 | 0.2 |     |     |     |
| 271360 | 5714325 | 2.1 | 1.2 | 0.2 |     |     |     |
| 271375 | 5712877 | 1.8 | 1.9 | 0.2 | 3.4 | 3.1 | 0.2 |

|        |         |                 |     |     |     |     |     |
|--------|---------|-----------------|-----|-----|-----|-----|-----|
| 271375 | 5712877 | 3.3             | 3.0 | 0.2 |     |     |     |
| 271375 | 5712877 | 2.6             | 2.5 | 0.2 |     |     |     |
| 271375 | 5712877 | 5.9             | 5.0 | 0.2 |     |     |     |
| 271686 | 5712927 | 4               | 3   | 0.2 | 4   | 3   | 0.2 |
| 271797 | 5711737 | 3.9             | 4.0 | 0.2 | 3.3 | 3.1 | 0.2 |
| 271797 | 5711737 | 2.7             | 2.2 | 0.2 |     |     |     |
| 271835 | 5714019 | first detected  |     |     |     |     |     |
| 271915 | 5713012 | 3               | 2.1 | 0.6 | 2.5 | 1.9 | 0.4 |
| 271915 | 5713012 | 3               | 1.5 | 0.5 |     |     |     |
| 271915 | 5713012 | 1.8             | 0.9 | 0.2 |     |     |     |
| 271915 | 5713012 | 2.1             | 1.7 | 0.4 |     |     |     |
| 271915 | 5713012 | 2.7             | 2.7 | 0.3 |     |     |     |
| 271915 | 5713012 | 2.5             | 2.3 | 0.2 |     |     |     |
| 271962 | 5711120 | southern extent |     |     |     |     |     |
| 271965 | 5711469 | 2               | 1.8 | 0.2 | 1.3 | 1.0 | 0.2 |
| 271965 | 5711469 | 0.9             | 0.7 | 0.2 |     |     |     |
| 271965 | 5711469 | 1               | 0.6 | 0.2 |     |     |     |
| 271965 | 5711469 | 1.1             | 0.7 | 0.2 |     |     |     |
| 271992 | 5713863 | no plates       |     |     |     |     |     |
| 271992 | 5713863 | 2.1             | 1.4 | 0.2 | 2.6 | 1.7 | 0.3 |
| 271992 | 5713863 | 2.4             | 1   | 0.2 |     |     |     |
| 271992 | 5713863 | 3               | 1.5 | 0.2 |     |     |     |
| 271992 | 5713863 | 4               | 2   | 0.5 |     |     |     |
| 271992 | 5713863 | 2.5             | 2   | 0.5 |     |     |     |
| 271992 | 5713863 | 2               | 1.5 | 0.2 |     |     |     |
| 271992 | 5713863 | 2               | 2   | 0.1 |     |     |     |

|        |         |     |     |     |     |     |     |
|--------|---------|-----|-----|-----|-----|-----|-----|
| 271992 | 5713863 | 3   | 2   | 0.2 |     |     |     |
| 271992 | 5713863 | 2   | 1.5 | 0.2 |     |     |     |
| 271998 | 5713606 | 2.6 | 1.6 | 0.3 | 2.7 | 1.8 | 0.4 |
| 271998 | 5713606 | 2.3 | 1.7 | 0.4 |     |     |     |
| 271998 | 5713606 | 3.3 | 2.1 | 0.4 |     |     |     |
| 271998 | 5712985 | 5.8 | 6.2 | 0.1 | 5.8 | 6.2 | 0.1 |
| 272013 | 5711169 | 2   | 1.5 | 0.5 | 2.0 | 1.1 | 0.3 |
| 272013 | 5711169 | 2.4 | 1.4 | 0.5 |     |     |     |
| 272013 | 5711169 | 2.4 | 1.4 | 0.5 |     |     |     |
| 272013 | 5711169 | 1.5 | 0.9 | 0.2 |     |     |     |
| 272013 | 5711170 | 3   | 1.4 | 0.2 |     |     |     |
| 272013 | 5711170 | 2   | 0.7 | 0.2 |     |     |     |
| 272013 | 5711170 | 1.2 | 0.8 | 0.2 |     |     |     |
| 272013 | 5711170 | 1.6 | 1   | 0.2 |     |     |     |
| 272033 | 5711865 | 1.1 | 1   | 0.9 | 2.1 | 1.6 | 0.5 |
| 272033 | 5711865 | 1.3 | 1.2 | 0.3 |     |     |     |
| 272033 | 5711865 | 3.7 | 2.5 | 0.6 |     |     |     |
| 272033 | 5711865 | 2.2 | 1.7 | 0.3 |     |     |     |
| 272048 | 5713228 | 2.5 | 1.9 | 0.4 | 2.9 | 1.7 | 0.3 |
| 272048 | 5713228 | 2.7 | 2.2 | 0.3 |     |     |     |
| 272048 | 5713228 | 3.3 | 2.1 | 0.3 |     |     |     |
| 272048 | 5713228 | 2.3 | 1.5 | 0.3 |     |     |     |
| 272048 | 5713228 | 4.8 | 1.5 | 0.4 |     |     |     |
| 272048 | 5713228 | 2.4 | 1.5 | 0.2 |     |     |     |
| 272048 | 5713228 | 2.3 | 1.7 | 0.2 |     |     |     |
| 272048 | 5713228 | 2.6 | 1.1 | 0.1 |     |     |     |
| 272048 | 5713228 | 2.7 | 2   | 0.3 |     |     |     |
| 272048 | 5713228 | 2.9 | 1.8 | 0.2 |     |     |     |

|        |         |                 |     |     |     |     |     |
|--------|---------|-----------------|-----|-----|-----|-----|-----|
| 272061 | 5714213 | no plates       |     |     |     |     |     |
| 272065 | 5714800 | northern extent |     |     |     |     |     |
| 272072 | 5712758 | 2.4             | 2.1 | 0.5 | 2.2 | 1.5 | 0.4 |
| 272072 | 5712758 | 2.1             | 1.2 | 0.4 |     |     |     |
| 272072 | 5712758 | 1.7             | 0.9 | 0.5 |     |     |     |
| 272072 | 5712758 | 1.3             | 1   | 0.3 |     |     |     |
| 272072 | 5712758 | 3.6             | 2.4 | 0.3 |     |     |     |
| 272117 | 5712433 | 4.8             | 3.5 | 0.5 | 5.1 | 4.8 | 0.3 |
| 272117 | 5712433 | 4.5             | 5.0 | 0.2 |     |     |     |
| 272117 | 5712433 | 6.0             | 5.9 | 0.2 |     |     |     |
| 272138 | 5713771 | 4.6             | 7.1 | 0.2 | 3.9 | 3.7 | 0.3 |
| 272138 | 5713771 | 4.5             | 4.5 | 0.2 |     |     |     |
| 272138 | 5713771 | 4.5             | 3.3 | 0.2 |     |     |     |
| 272138 | 5713771 | 4.2             | 3.1 | 0.8 |     |     |     |
| 272138 | 5713771 | 4.2             | 3.5 | 0.3 |     |     |     |
| 272138 | 5713771 | 3.6             | 3.2 | 0.4 |     |     |     |
| 272138 | 5713771 | 3.5             | 2.7 | 0.3 |     |     |     |
| 272138 | 5713771 | 2.0             | 1.9 | 0.2 |     |     |     |
| 272167 | 5713046 | 1.3             | 0.9 | 0.3 | 2.1 | 1.2 | 0.3 |
| 272167 | 5713046 | 3               | 1.6 | 0.4 |     |     |     |
| 272167 | 5713046 | 1.7             | 1.3 | 0.2 |     |     |     |
| 272167 | 5713046 | 1.5             | 0.6 | 0.3 |     |     |     |
| 272167 | 5713046 | 3.2             | 1.6 | 0.2 |     |     |     |
| 272188 | 5712331 | 3.4             | 3.1 | 0.5 | 3.4 | 3.1 | 0.5 |

| Averages            |         | Black Scoria |                   |            | Zingg | (a>b>c) | Wilson and Huang (1979) | Brown Scoria |                   |            | Zingg | (a>b>c) | Wilson and Huang (1979) | Plate Tephra |                   |            | Zingg | (a>b>c) | Wilson and Huang (1979) |
|---------------------|---------|--------------|-------------------|------------|-------|---------|-------------------------|--------------|-------------------|------------|-------|---------|-------------------------|--------------|-------------------|------------|-------|---------|-------------------------|
| Easting    Northing |         | Major (cm)   | Intermediate (cm) | Minor (cm) | b/a   | c/b     | F =b+c/2a               | Major (cm)   | Intermediate (cm) | Minor (cm) | b/a   | c/b     | F =b+c/2a               | Major (cm)   | Intermediate (cm) | Minor (cm) | b/a   | c/b     | F =b+c/2a               |
| 270035              | 5712926 | 1.5          | 1.3               | 0.9        | 0.85  | 0.67    | 0.71                    | 1.1          | 0.9               | 0.5        | 0.81  | 0.53    | 0.62                    |              |                   |            |       |         |                         |
| 271199              | 5714002 | 2.0          | 1.2               | 0.7        | 0.60  | 0.60    | 0.48                    | 2.0          | 1.5               | 0.9        | 0.76  | 0.60    | 0.61                    |              |                   |            |       |         |                         |
| 270099              | 5713477 | 2.1          | 1.6               | 1.1        | 0.74  | 0.71    | 0.63                    | 1.9          | 1.4               | 1.0        | 0.73  | 0.74    | 0.64                    | 3.0          | 2.2               | 0.4        | 0.73  | 0.16    | 0.43                    |
| 270233              | 5711743 | 2.2          | 1.4               | 0.7        | 0.61  | 0.48    | 0.45                    | 1.7          | 1.1               | 0.5        | 0.63  | 0.50    | 0.47                    | 1.8          | 1.3               | 0.2        | 0.75  | 0.18    | 0.44                    |
| 269457              | 5713012 | 2.2          | 1.3               | 1.0        | 0.59  | 0.75    | 0.52                    | 2.0          | 1.2               | 0.9        | 0.61  | 0.76    | 0.54                    | 3.8          | 1.4               | 0.3        | 0.37  | 0.18    | 0.22                    |
| 271200              | 5713997 | 2.3          | 1.5               | 1.0        | 0.63  | 0.69    | 0.54                    |              |                   |            |       |         |                         |              |                   |            |       |         |                         |
| 271236              | 5711558 | 2.3          | 1.5               | 0.8        | 0.64  | 0.55    | 0.50                    | 1.6          | 0.9               | 0.5        | 0.55  | 0.60    | 0.44                    | 1.8          | 1.4               | 0.3        | 0.80  | 0.21    | 0.49                    |
| 270742              | 5711658 | 2.3          | 1.5               | 0.7        | 0.64  | 0.46    | 0.47                    | 1.6          | 1.1               | 0.5        | 0.66  | 0.52    | 0.50                    | 1.9          | 1.5               | 0.3        | 0.78  | 0.23    | 0.48                    |
| 269734              | 5712110 | 2.4          | 1.6               | 0.7        | 0.69  | 0.41    | 0.48                    | 1.4          | 0.8               | 0.4        | 0.54  | 0.53    | 0.41                    | 3.1          | 2.2               | 0.3        | 0.70  | 0.14    | 0.40                    |
| 270668              | 5713960 | 2.4          | 1.6               | 1.0        | 0.69  | 0.61    | 0.56                    | 1.8          | 1.2               | 0.7        | 0.65  | 0.61    | 0.53                    | 2.6          | 2.0               | 0.8        | 0.76  | 0.40    | 0.53                    |
| 269373              | 5713613 | 2.4          | 1.9               | 1.1        | 0.77  | 0.59    | 0.62                    | 1.5          | 1.1               | 0.6        | 0.71  | 0.57    | 0.56                    | 3.9          | 3.5               | 0.9        | 0.88  | 0.25    | 0.55                    |
| 269367              | 5713965 | 2.5          | 1.5               | 1.0        | 0.61  | 0.67    | 0.51                    | 1.5          | 0.9               | 0.6        | 0.62  | 0.65    | 0.51                    |              |                   |            |       |         |                         |
| 270873              | 5712882 | 2.5          | 1.5               | 0.9        | 0.61  | 0.61    | 0.49                    | 1.8          | 1.2               | 0.9        | 0.68  | 0.72    | 0.58                    |              |                   |            |       |         |                         |
| 268235              | 5713143 | 2.5          | 1.8               | 1.1        | 0.74  | 0.59    | 0.59                    | 1.5          | 1.2               | 0.5        | 0.77  | 0.46    | 0.56                    | 2.3          | 1.8               | 0.4        | 0.81  | 0.24    | 0.50                    |
| 272173              | 5714471 | 2.5          | 1.5               | 0.8        | 0.60  | 0.54    | 0.46                    | 2.2          | 1.2               | 1.0        | 0.56  | 0.83    | 0.51                    |              |                   |            |       |         |                         |
| 269630              | 5713977 | 2.5          | 1.6               | 0.9        | 0.63  | 0.54    | 0.49                    | 1.7          | 1.1               | 0.6        | 0.61  | 0.60    | 0.49                    |              |                   |            |       |         |                         |
| 268746              | 5712931 | 2.6          | 1.9               | 0.8        | 0.72  | 0.43    | 0.52                    | 1.5          | 1.0               | 0.5        | 0.64  | 0.53    | 0.49                    |              |                   |            |       |         |                         |
| 269003              | 5713728 | 2.6          | 2.0               | 1.3        | 0.74  | 0.68    | 0.63                    | 1.9          | 1.4               | 0.7        | 0.75  | 0.51    | 0.57                    | 3.1          | 2.3               | 0.4        | 0.75  | 0.15    | 0.43                    |
| 270394              | 5712910 | 2.7          | 1.7               | 1.1        | 0.64  | 0.64    | 0.53                    | 1.9          | 1.2               | 0.8        | 0.62  | 0.67    | 0.52                    | 2.1          | 1.4               | 0.2        | 0.65  | 0.16    | 0.38                    |
| 270185              | 5713957 | 2.7          | 1.6               | 1.1        | 0.61  | 0.64    | 0.50                    | 1.9          | 1.4               | 0.8        | 0.71  | 0.57    | 0.55                    | 2.0          | 1.6               | 0.4        | 0.77  | 0.23    | 0.47                    |
| 270840              | 5714316 | 2.7          | 1.7               | 1.0        | 0.62  | 0.60    | 0.49                    | 2.3          | 1.4               | 0.9        | 0.61  | 0.62    | 0.49                    | 2.7          | 1.6               | 0.3        | 0.58  | 0.16    | 0.34                    |
| 269728              | 5712967 | 2.7          | 1.8               | 1.3        | 0.67  | 0.70    | 0.57                    | 1.6          | 1.1               | 0.7        | 0.67  | 0.67    | 0.56                    |              |                   |            |       |         |                         |
| 271067              | 5714345 | 2.8          | 1.7               | 1.0        | 0.59  | 0.60    | 0.47                    | 2.4          | 1.3               | 0.8        | 0.53  | 0.64    | 0.43                    |              |                   |            |       |         |                         |
| 271259              | 5712864 | 2.8          | 1.8               | 1.1        | 0.62  | 0.62    | 0.50                    | 1.9          | 1.3               | 0.8        | 0.65  | 0.61    | 0.52                    |              |                   |            |       |         |                         |
| 271903              | 5711298 | 2.8          | 1.8               | 0.8        | 0.62  | 0.47    | 0.45                    | 2.6          | 1.5               | 0.6        | 0.56  | 0.44    | 0.40                    |              |                   |            |       |         |                         |
| 268198              | 5713603 | 2.9          | 2.0               | 1.2        | 0.69  | 0.62    | 0.56                    | 1.8          | 1.1               | 0.7        | 0.63  | 0.64    | 0.52                    |              |                   |            |       |         |                         |
| 271686              | 5712927 | 2.9          | 1.7               | 1.0        | 0.58  | 0.61    | 0.47                    | 2.3          | 1.7               | 1.0        | 0.72  | 0.60    | 0.58                    | 4.0          | 3.0               | 0.2        | 0.75  | 0.07    | 0.40                    |
| 271998              | 5713606 | 2.9          | 1.8               | 1.0        | 0.61  | 0.55    | 0.48                    | 3.2          | 1.8               | 0.9        | 0.57  | 0.52    | 0.43                    | 2.7          | 1.8               | 0.4        | 0.66  | 0.20    | 0.40                    |
| 267158              | 5715550 | 2.9          | 1.7               | 1.0        | 0.57  | 0.58    | 0.45                    | 3.5          | 2.5               | 1.0        | 0.71  | 0.40    | 0.50                    |              |                   |            |       |         |                         |
| 272013              | 5711169 | 2.9          | 1.8               | 0.8        | 0.64  | 0.42    | 0.45                    | 1.9          | 1.4               | 0.9        | 0.73  | 0.64    | 0.60                    | 2.0          | 1.1               | 0.3        | 0.57  | 0.27    | 0.36                    |
| 272033              | 5711865 | 2.9          | 2.1               | 1.3        | 0.71  | 0.63    | 0.58                    | 2.4          | 1.6               | 1.0        | 0.67  | 0.60    | 0.54                    | 2.1          | 1.6               | 0.5        | 0.77  | 0.33    | 0.51                    |
| 272131              | 5714881 | 2.9          | 1.7               | 1.2        | 0.59  | 0.69    | 0.50                    | 2.2          | 1.4               | 0.9        | 0.61  | 0.67    | 0.51                    |              |                   |            |       |         |                         |
| 270854              | 5713260 | 2.9          | 1.5               | 1.0        | 0.53  | 0.65    | 0.43                    | 1.9          | 1.3               | 0.8        | 0.67  | 0.60    | 0.54                    | 2.4          | 1.7               | 0.4        |       |         |                         |
| 271366              | 5711656 | 3.0          | 2.3               | 1.0        | 0.79  | 0.44    | 0.56                    | 3.3          | 2.3               | 1.0        | 0.72  | 0.43    | 0.51                    |              |                   |            |       |         |                         |
| 269236              | 5712696 | 3.0          | 1.9               | 0.9        | 0.63  | 0.48    | 0.46                    | 1.7          | 1.1               | 0.6        | 0.65  | 0.58    | 0.52                    | 3.6          | 2.3               | 0.3        | 0.63  | 0.13    | 0.36                    |
| 271992              | 5713863 | 3.0          | 2.0               | 0.8        | 0.65  | 0.38    | 0.45                    | 2.8          | 2.0               | 1.0        | 0.70  | 0.53    | 0.54                    | 2.6          | 1.7               | 0.3        | 0.65  | 0.15    | 0.37                    |
| 268570              | 5712209 | 3.0          | 2.2               | 1.7        | 0.73  | 0.76    | 0.64                    | 2.0          | 1.3               | 0.7        | 0.68  | 0.55    | 0.53                    |              |                   |            |       |         |                         |
| 271965              | 5711469 | 3.1          | 2.3               | 1.1        | 0.73  | 0.48    | 0.54                    | 2.2          | 1.7               | 1.0        | 0.78  | 0.58    | 0.62                    | 1.3          | 1.0               | 0.2        | 0.76  | 0.21    | 0.46                    |
| 271115              | 5711857 | 3.1          | 2.0               | 0.9        | 0.66  | 0.43    | 0.47                    | 3.3          | 2.1               | 1.2        | 0.65  | 0.58    | 0.51                    | 2.8          | 2.5               | 0.2        | 0.91  | 0.08    | 0.49                    |
| 270182              | 5712432 | 3.2          | 1.9               | 1.1        | 0.61  | 0.56    | 0.48                    | 3.1          | 2.0               | 1.2        | 0.63  | 0.58    | 0.50                    | 4.0          | 3.5               | 0.2        | 0.88  | 0.06    | 0.46                    |
| 270883              | 5712042 | 3.2          | 2.2               | 1.0        | 0.68  | 0.46    | 0.49                    | 3.5          | 2.3               | 1.1        | 0.66  | 0.45    | 0.48                    | 2.7          | 1.8               | 0.2        | 0.67  | 0.12    | 0.37                    |
| 269439              | 5711714 | 3.2          | 2.3               | 1.5        | 0.71  | 0.67    | 0.59                    | 2.5          | 1.8               | 1.0        | 0.73  | 0.53    | 0.56                    |              |                   |            |       |         |                         |
| 271635              | 5711445 | 3.3          | 2.1               | 1.2        | 0.66  | 0.57    | 0.52                    |              |                   |            |       |         |                         |              |                   |            |       |         |                         |
| 272162              | 5714624 | 3.3          | 1.8               | 1.0        | 0.53  | 0.56    | 0.42                    | 2.8          | 1.7               | 1.1        | 0.59  | 0.64    | 0.49                    |              |                   |            |       |         |                         |
| 268058              | 5712453 | 3.3          | 2.4               | 1.4        | 0.72  | 0.59    | 0.57                    |              |                   |            |       |         |                         | 3.1          | 2.2               | 0.2        | 0.73  | 0.10    | 0.40                    |
| 268267              | 5714012 | 3.3          | 1.9               | 1.2        | 0.57  | 0.66    | 0.47                    | 2.1          | 1.5               | 0.9        | 0.72  | 0.63    | 0.58                    |              |                   |            |       |         |                         |
| 271702              | 5714709 | 3.3          | 2.0               | 1.0        | 0.61  | 0.49    | 0.46                    | 3.6          | 1.7               | 1.0        | 0.48  | 0.61    | 0.39                    |              |                   |            |       |         |                         |
| 272048              | 5713228 | 3.4          | 2.1               | 1.3        | 0.63  | 0.60    | 0.50                    | 2.8          | 1.9               | 1.0        | 0.67  | 0.56    | 0.52                    | 2.9          | 1.7               | 0.3        | 0.61  | 0.16    | 0.35                    |
| 271914              | 5713011 | 3.4          | 2.3               | 1.4        | 0.68  | 0.60    | 0.55                    | 2.1          | 1.4               | 0.9        | 0.66  | 0.65    | 0.54                    | 2.5          | 1.9               | 0.4        | 0.74  | 0.20    | 0.44                    |
| 271360              | 5714325 | 3.4          | 1.9               | 1.1        | 0.56  | 0.60    | 0.45                    | 3.3          | 1.9               | 1.1        | 0.58  | 0.58    | 0.46                    | 2.9          | 1.2               | 0.2        | 0.41  | 0.17    | 0.24                    |
| 270577              | 5711305 | 3.4          | 1.9               | 0.7        | 0.57  | 0.36    | 0.39                    | 2.8          | 2.1               | 0.7        | 0.74  | 0.35    | 0.50                    |              |                   |            |       |         |                         |
| 270438              | 5714593 | 3.4          | 2.1               | 1.0        | 0.60  | 0.47    | 0.44                    | 2.8          | 1.6               | 0.9        | 0.55  | 0.58    | 0.43                    |              |                   |            |       |         |                         |
| 270658              | 5712266 | 3.5          | 2.3               | 1.1        | 0.66  | 0.48    | 0.49                    | 3.5          | 2.2               | 1.0        | 0.64  | 0.44    | 0.46                    | 2.3          | 1.5               | 0.2        | 0.67  | 0.10    | 0.37                    |
| 271885              | 5714568 | 3.6          | 2.0               | 1.1        | 0.57  | 0.52    | 0.43                    | 3.3          | 2.1               | 1.3        | 0.63  | 0.60    | 0.51                    |              |                   |            |       |         |                         |
| 272061              | 5714213 | 3.6          | 2.5               | 1.5        | 0.68  | 0.61    | 0.55                    | 3.5          | 2.0               | 1.1        | 0.56  | 0.57    | 0.44                    |              |                   |            |       |         |                         |
| 269014              | 5712036 | 3.7          | 2.6               | 1.2        | 0.70  | 0.47    | 0.51                    | 3.2          | 2.6               | 1.5        | 0.81  | 0.58    | 0.64                    |              |                   |            |       |         |                         |
| 271430              | 5714766 | 3.8          | 2.2               | 1.4        | 0.57  | 0.62    | 0.46                    | 3.0          | 1.8               | 1.0        | 0.58  | 0.59    | 0.46                    |              |                   |            |       |         |                         |
| 270573              | 5714484 | 3.9          | 1.9               | 1.0        | 0.49  | 0.52    | 0.38                    | 2.9          | 1.6               | 0.9        | 0.57  | 0.55    | 0.44                    |              |                   |            |       |         |                         |

|        |         |     |     |     |      |      |      |     |     |     |      |      |      |     |     |     |      |      |      |
|--------|---------|-----|-----|-----|------|------|------|-----|-----|-----|------|------|------|-----|-----|-----|------|------|------|
| 272188 | 5712331 | 3.9 | 2.3 | 1.3 | 0.59 | 0.56 | 0.46 | 2.6 | 1.7 | 1.2 | 0.66 | 0.68 | 0.55 | 3.4 | 3.1 | 0.5 | 0.91 | 0.16 | 0.53 |
| 268154 | 5713170 | 3.9 | 2.4 | 1.9 | 0.61 | 0.81 | 0.55 | 3.3 | 2.7 | 1.4 | 0.82 | 0.51 | 0.62 | 4.3 | 3.5 | 0.4 | 0.82 | 0.12 | 0.46 |
| 272072 | 5712758 | 3.9 | 2.6 | 1.4 | 0.66 | 0.54 | 0.51 | 2.6 | 1.7 | 1.2 | 0.66 | 0.72 | 0.57 | 2.2 | 1.5 | 0.4 | 0.68 | 0.26 | 0.43 |
| 272167 | 5713046 | 3.9 | 2.8 | 1.8 | 0.72 | 0.62 | 0.59 | 2.5 | 1.9 | 1.4 | 0.77 | 0.70 | 0.65 | 2.1 | 1.2 | 0.3 | 0.56 | 0.23 | 0.35 |
| 270423 | 5712432 | 4.0 | 2.8 | 1.4 | 0.70 | 0.51 | 0.53 | 2.9 | 2.2 | 1.1 | 0.77 | 0.49 | 0.57 |     |     |     |      |      |      |
| 270585 | 5714725 | 4.0 | 2.3 | 1.1 | 0.57 | 0.49 | 0.43 | 3.2 | 1.8 | 1.0 | 0.59 | 0.52 | 0.45 |     |     |     |      |      |      |
| 271206 | 5714743 | 4.1 | 2.1 | 1.1 | 0.52 | 0.49 | 0.39 | 3.5 | 2.1 | 1.1 | 0.61 | 0.53 | 0.46 |     |     |     |      |      |      |
| 270920 | 5714758 | 4.5 | 2.3 | 1.1 | 0.51 | 0.48 | 0.38 | 4.0 | 2.5 | 1.4 | 0.63 | 0.57 | 0.49 |     |     |     |      |      |      |
| 269334 | 5712684 | 4.5 | 3.5 | 2.7 | 0.78 | 0.76 | 0.69 | 4.3 | 3.4 | 2.2 | 0.78 | 0.67 | 0.65 | 4.5 | 3.3 | 0.3 | 0.73 | 0.09 | 0.40 |
| 272138 | 5713771 | 4.6 | 3.8 | 2.5 | 0.82 | 0.65 | 0.68 | 4.6 | 3.3 | 2.2 | 0.73 | 0.65 | 0.60 | 3.9 | 3.7 | 0.3 | 0.94 | 0.09 | 0.51 |
| 271998 | 5712985 | 4.7 | 3.7 | 2.8 | 0.79 | 0.78 | 0.70 | 3.5 | 2.7 | 2.1 | 0.79 | 0.77 | 0.70 | 5.8 | 6.2 | 0.1 | 1.07 | 0.02 | 0.54 |
| 271084 | 5713646 | 4.7 | 3.8 | 2.6 | 0.82 | 0.68 | 0.68 | 4.4 | 3.4 | 2.6 | 0.76 | 0.76 | 0.67 | 4.1 | 3.4 | 0.3 | 0.82 | 0.09 | 0.45 |
| 270653 | 5712937 | 4.8 | 4.0 | 3.1 | 0.84 | 0.77 | 0.74 | 4.8 | 3.9 | 2.7 | 0.83 | 0.69 | 0.70 | 6.2 | 4.4 | 0.3 | 0.71 | 0.07 | 0.38 |
| 269342 | 5713103 | 4.9 | 3.7 | 2.9 | 0.76 | 0.80 | 0.68 | 4.1 | 3.3 | 2.0 | 0.79 | 0.61 | 0.64 | 5.2 | 3.8 | 0.3 | 0.74 | 0.09 | 0.40 |
| 267189 | 5715580 | 4.9 | 3.2 | 1.7 | 0.65 | 0.54 | 0.50 |     |     |     |      |      |      |     |     |     |      |      |      |
| 267837 | 5714741 | 5.0 | 3.0 | 2.2 | 0.60 | 0.76 | 0.52 | 2.6 | 1.8 | 1.3 | 0.70 | 0.74 | 0.61 |     |     |     |      |      |      |
| 271237 | 5712325 | 5.0 | 3.9 | 2.7 | 0.78 | 0.69 | 0.66 | 4.5 | 3.4 | 2.4 | 0.76 | 0.70 | 0.65 | 3.6 | 3.3 | 0.2 | 0.93 | 0.07 | 0.50 |
| 269827 | 5713004 | 5.4 | 4.4 | 3.3 | 0.81 | 0.75 | 0.71 | 4.3 | 3.5 | 2.4 | 0.81 | 0.68 | 0.68 | 6.2 | 4.3 | 0.3 | 0.69 | 0.07 | 0.37 |
| 271797 | 5711737 | 5.4 | 4.0 | 2.9 | 0.73 | 0.73 | 0.63 | 4.7 | 3.3 | 2.0 | 0.71 | 0.61 | 0.57 | 3.3 | 3.1 | 0.2 | 0.94 | 0.06 | 0.50 |
| 272117 | 5712433 | 5.5 | 4.2 | 3.3 | 0.77 | 0.79 | 0.69 | 4.8 | 3.4 | 2.5 | 0.72 | 0.73 | 0.62 | 5.1 | 4.8 | 0.3 | 0.94 | 0.06 | 0.50 |
| 268545 | 5712895 | 5.5 | 4.2 | 3.4 | 0.77 | 0.81 | 0.70 | 5.1 | 3.9 | 2.4 | 0.77 | 0.60 | 0.62 | 9.0 | 7.4 | 0.3 | 0.82 | 0.05 | 0.43 |
| 268009 | 5713603 | 5.6 | 5.1 | 4.0 | 0.92 | 0.78 | 0.82 | 4.8 | 4.0 | 2.3 | 0.83 | 0.58 | 0.66 | 8.9 | 6.5 | 0.4 | 0.73 | 0.06 | 0.39 |
| 271375 | 5712877 | 5.6 | 4.3 | 3.3 | 0.77 | 0.76 | 0.68 | 3.9 | 2.9 | 2.2 | 0.73 | 0.77 | 0.65 | 3.4 | 3.1 | 0.2 | 0.91 | 0.06 | 0.49 |
| 268772 | 5713657 | 6.4 | 4.8 | 3.7 | 0.75 | 0.77 | 0.66 | 5.4 | 4.1 | 3.3 | 0.76 | 0.80 | 0.69 | 6.6 | 5.0 | 0.4 | 0.76 | 0.08 | 0.41 |
| 267794 | 5714052 | 6.6 | 5.6 | 4.5 | 0.85 | 0.81 | 0.77 | 5.2 | 4.1 | 2.9 | 0.79 | 0.69 | 0.67 | 7.6 | 5.7 | 0.3 | 0.75 | 0.06 | 0.40 |
| 260858 | 5712453 |     |     |     |      |      |      | 2.5 | 1.9 | 1.0 | 0.75 | 0.55 | 0.58 |     |     |     |      |      |      |
| 266991 | 5715282 |     |     |     |      |      |      | 2.6 | 1.7 | 1.1 | 0.65 | 0.68 | 0.55 |     |     |     |      |      |      |
| 269240 | 5713221 |     |     |     |      |      |      | 1.7 | 1.2 | 0.8 | 0.71 | 0.62 | 0.58 | 2.3 | 1.5 | 0.2 | 0.68 | 0.15 | 0.39 |
| 271898 | 5712972 |     |     |     |      |      |      | 1.9 | 1.3 | 1.0 | 0.67 | 0.76 | 0.59 |     |     |     |      |      |      |

| Easting | Northing | Thickness (cm) |
|---------|----------|----------------|
| 267921  | 5714560  | 0              |
| 272065  | 5714800  | 0              |
| 271835  | 5714019  | 0.1            |
| 271962  | 5711120  | 0.1            |
| 267794  | 5714052  | 1              |
| 269457  | 5713012  | 1              |
| 270035  | 5712926  | 1              |
| 270438  | 5714593  | 1              |
| 270585  | 5714725  | 1              |
| 270840  | 5714316  | 1              |
| 271067  | 5714345  | 1              |
| 272131  | 5714881  | 1              |
| 272162  | 5714624  | 1              |
| 272173  | 5714471  | 1              |
| 267683  | 5714231  | 1.5            |
| 267837  | 5714741  | 1.5            |
| 270573  | 5714484  | 1.5            |
| 270577  | 5711305  | 1.5            |
| 271702  | 5714709  | 1.5            |
| 271885  | 5714568  | 1.5            |
| 272061  | 5714213  | 1.5            |
| 271236  | 5711558  | 1.8            |
| 267785  | 5713625  | 2              |
| 269236  | 5712696  | 2              |
| 269368  | 5713979  | 2              |
| 269728  | 5712967  | 2              |
| 270394  | 5712910  | 2              |
| 270423  | 5712432  | 2              |
| 270616  | 5711055  | 2              |
| 270668  | 5713960  | 2              |
| 270693  | 5713963  | 2              |
| 271199  | 5714002  | 2              |



|        |         |     |
|--------|---------|-----|
| 271206 | 5714743 | 2   |
| 271360 | 5714325 | 2   |
| 271430 | 5714766 | 2   |
| 271797 | 5711737 | 2   |
| 271998 | 5713606 | 2   |
| 271998 | 5713606 | 2   |
| 272138 | 5713771 | 2   |
| 268198 | 5713603 | 2.5 |
| 268235 | 5713143 | 2.5 |
| 269374 | 5713622 | 2.5 |
| 269439 | 5711714 | 2.5 |
| 269439 | 5711714 | 2.5 |
| 270233 | 5711743 | 2.5 |
| 270658 | 5712266 | 2.5 |
| 270920 | 5714758 | 2.5 |
| 272167 | 5713046 | 2.7 |
| 268746 | 5712931 | 2.8 |
| 272033 | 5711865 | 2.8 |
| 272188 | 5712331 | 2.8 |
| 268009 | 5713603 | 3   |
| 268154 | 5713170 | 3   |
| 268272 | 5714005 | 3   |
| 269004 | 5713727 | 3   |
| 269734 | 5712110 | 3   |
| 270099 | 5713477 | 3   |
| 270182 | 5712432 | 3   |
| 270195 | 5713958 | 3   |
| 270742 | 5711658 | 3   |
| 270873 | 5712882 | 3   |
| 270883 | 5712042 | 3   |
| 271084 | 5713646 | 3   |
| 271115 | 5711857 | 3   |
| 271200 | 5713997 | 3   |
| 271237 | 5712325 | 3   |

|        |         |     |
|--------|---------|-----|
| 271259 | 5712864 | 3   |
| 271635 | 5711445 | 3   |
| 271903 | 5711298 | 3   |
| 271915 | 5713012 | 3   |
| 271992 | 5713863 | 3   |
| 272072 | 5712758 | 3   |
| 269014 | 5712036 | 3.5 |
| 269014 | 5712036 | 3.5 |
| 272013 | 5711169 | 3.5 |
| 267158 | 5715550 | 4   |
| 267189 | 5715580 | 4   |
| 270854 | 5713260 | 4   |
| 270854 | 5713260 | 4   |
| 271366 | 5711656 | 4   |
| 271686 | 5712927 | 4   |
| 271965 | 5711469 | 4   |
| 271998 | 5712985 | 4   |
| 272117 | 5712433 | 4   |
| 268058 | 5712453 | 4.5 |
| 268570 | 5712209 | 4.5 |
| 268772 | 5713657 | 4.5 |
| 270792 | 5711449 | 4.5 |
| 272048 | 5713228 | 4.5 |
| 271375 | 5712877 | 4.7 |
| 269630 | 5713977 | 5   |
| 269827 | 5713004 | 5   |
| 270653 | 5712937 | 5.5 |
| 269342 | 5713103 | 6.5 |
| 268545 | 5712895 | 7   |
| 269334 | 5712684 | 7   |

| Plagioclase Phenocrysts |                 | Plagioclase Microlites |                 | Olivine |                 |
|-------------------------|-----------------|------------------------|-----------------|---------|-----------------|
| Angle                   | converted angle | Angle                  | converted angle | Angle   | converted angle |
| 9.964                   | 9.964           | 168.475                | -11.525         | 75.719  | 75.719          |
| 12.563                  | 12.563          | 16.021                 | 16.021          | 17.842  | 17.842          |
| 0.519                   | 0.519           | 170.959                | -9.041          | 0.633   | 0.633           |
| 91.139                  | -88.861         | 160.64                 | -19.36          | 3.957   | 3.957           |
| 6.414                   | 6.414           | 132.642                | -47.358         | 165.993 | -14.007         |
| 2.808                   | 2.808           | 115.371                | -64.629         | 129.501 | -50.499         |
| 1.412                   | 1.412           | 127.6                  | -52.4           | 164.88  | -15.12          |
| 9.69                    | 9.69            | 163.481                | -16.519         | 141.89  | -38.11          |
| 5.108                   | 5.108           | 17.541                 | 17.541          | 35.115  | 35.115          |
| 18.757                  | 18.757          | 177.838                | -2.162          | 79.658  | 79.658          |
| 87.718                  | 87.718          | 165.615                | -14.385         | 2.17    | 2.17            |
| 32.689                  | 32.689          | 12.224                 | 12.224          | 21.197  | 21.197          |
| 0.612                   | 0.612           | 146.808                | -33.192         | 88.828  | 88.828          |
| 145.709                 | -34.291         | 5.034                  | 5.034           | 127.792 | -52.208         |
| 163.579                 | -16.421         | 147.806                | -32.194         | 5.234   | 5.234           |
| 16.778                  | 16.778          | 25.866                 | 25.866          | 162.712 | -17.288         |
| 147.011                 | -32.989         | 156.943                | -23.057         | 155.468 | -24.532         |
| 24.093                  | 24.093          | 163.318                | -16.682         | 128.792 | -51.208         |
| 10.405                  | 10.405          | 147.522                | -32.478         | 177.887 | -2.113          |
| 132.482                 | -47.518         | 19.186                 | 19.186          | 154.787 | -25.213         |
| 10.757                  | 10.757          | 22.46                  | 22.46           | 74.008  | 74.008          |
| 178.976                 | -1.024          | 4.579                  | 4.579           | 0.45    | 0.45            |
| 11.831                  | 11.831          | 103.612                | -76.388         | 139.56  | -40.44          |
| 25.528                  | 25.528          | 144.411                | -35.589         | 121.809 | -58.191         |
| 178.35                  | -1.65           | 37.447                 | 37.447          | 42.142  | 42.142          |
| 179.234                 | -0.766          | 42.109                 | 42.109          | 15.956  | 15.956          |
| 161.528                 | -18.472         | 79.722                 | 79.722          | 133.017 | -46.983         |
| 177.1                   | -2.9            | 0                      | 0               | 12.622  | 12.622          |
| 16.613                  | 16.613          | 161.689                | -18.311         | 27.722  | 27.722          |
| 174.601                 | -5.399          | 17.417                 | 17.417          | 148.831 | -31.169         |
| 175.695                 | -4.305          | 18.233                 | 18.233          | 162.336 | -17.664         |

|         |         |         |         |         |         |
|---------|---------|---------|---------|---------|---------|
| 150.02  | -29.98  | 7.114   | 7.114   | 41.078  | 41.078  |
| 178.333 | -1.667  | 13.828  | 13.828  | 41.684  | 41.684  |
| 170.608 | -9.392  | 175.473 | -4.527  | 50.341  | 50.341  |
| 12.538  | 12.538  | 137.407 | -42.593 | 0.035   | 0.035   |
| 177.455 | -2.545  | 170.116 | -9.884  | 22.323  | 22.323  |
| 179.079 | -0.921  | 154.395 | -25.605 | 26.769  | 26.769  |
| 176.728 | -3.272  | 170.759 | -9.241  | 17.439  | 17.439  |
| 170.898 | -9.102  | 1.182   | 1.182   | 152.453 | -27.547 |
| 7.041   | 7.041   | 135.564 | -44.436 | 178.194 | -1.806  |
| 178.718 | -1.282  | 38.584  | 38.584  | 155.417 | -24.583 |
| 13.073  | 13.073  | 163.924 | -16.076 | 174.01  | -5.99   |
| 178.825 | -1.175  | 151.391 | -28.609 | 171.048 | -8.952  |
| 179.272 | -0.728  | 120.3   | -59.7   | 133.488 | -46.512 |
| 168.275 | -11.725 | 135     | -45     | 24.585  | 24.585  |
| 158.007 | -21.993 | 168.565 | -11.435 | 14.31   | 14.31   |
| 176.14  | -3.86   | 100.278 | -79.722 | 149.446 | -30.554 |
| 10.522  | 10.522  | 119.781 | -60.219 | 91.18   | -88.82  |
| 0.492   | 0.492   | 112.379 | -67.621 | 11.296  | 11.296  |
| 4.033   | 4.033   | 3.504   | 3.504   | 152.429 | -27.571 |
| 179.356 | -0.644  | 0       | 0       | 175.642 | -4.358  |
| 151.089 | -28.911 | 13.024  | 13.024  | 64.215  | 64.215  |
| 158.066 | -21.934 | 133.163 | -46.837 | 96.662  | -83.338 |
| 173.816 | -6.184  | 169.672 | -10.328 | 147.261 | -32.739 |
| 161.517 | -18.483 | 26.306  | 26.306  | 12.711  | 12.711  |
| 137.559 | -42.441 | 26.728  | 26.728  | 147.609 | -32.391 |
| 178.021 | -1.979  | 37.019  | 37.019  | 12.122  | 12.122  |
| 155.727 | -24.273 | 27.447  | 27.447  | 137.254 | -42.746 |
| 34.476  | 34.476  | 22.285  | 22.285  | 0.091   | 0.091   |
| 179.78  | -0.22   | 9.175   | 9.175   | 145.254 | -34.746 |
| 1.31    | 1.31    | 82.282  | 82.282  | 173.149 | -6.851  |
| 2.054   | 2.054   | 141.635 | -38.365 | 27.775  | 27.775  |
| 167.6   | -12.4   | 177.158 | -2.842  | 167.982 | -12.018 |
| 1.073   | 1.073   | 0.567   | 0.567   | 140.592 | -39.408 |
| 173.602 | -6.398  | 178.294 | -1.706  | 5.905   | 5.905   |

|         |         |         |         |         |         |
|---------|---------|---------|---------|---------|---------|
| 8.168   | 8.168   | 173.188 | -6.812  | 24.665  | 24.665  |
| 17.421  | 17.421  | 155.289 | -24.711 | 37.873  | 37.873  |
| 1.657   | 1.657   | 97.762  | -82.238 | 15.065  | 15.065  |
| 176.635 | -3.365  | 178.648 | -1.352  | 160.538 | -19.462 |
| 163.49  | -16.51  | 147.007 | -32.993 | 166.093 | -13.907 |
| 175.698 | -4.302  | 73.176  | 73.176  | 175.893 | -4.107  |
| 179.9   | -0.1    | 5.104   | 5.104   | 18.91   | 18.91   |
| 176.166 | -3.834  | 168.561 | -11.439 | 24.205  | 24.205  |
| 168.479 | -11.521 | 21.04   | 21.04   | 94.383  | -85.617 |
| 161.286 | -18.714 | 151.663 | -28.337 | 179.321 | -0.679  |
| 3.716   | 3.716   | 165.697 | -14.303 | 2.067   | 2.067   |
| 179.366 | -0.634  | 128.318 | -51.682 | 150.887 | -29.113 |
| 179.982 | -0.018  | 107.22  | -72.78  | 124.263 | -55.737 |
| 0.741   | 0.741   | 6.428   | 6.428   | 112.391 | -67.609 |
| 177.062 | -2.938  | 16.115  | 16.115  | 152.859 | -27.141 |
| 175.898 | -4.102  | 166.718 | -13.282 | 54.104  | 54.104  |
| 163.891 | -16.109 | 143.615 | -36.385 | 119.414 | -60.586 |
| 150.753 | -29.247 | 45.836  | 45.836  | 12.612  | 12.612  |
| 172.138 | -7.862  | 35.739  | 35.739  | 0.664   | 0.664   |
| 175.344 | -4.656  | 66.58   | 66.58   | 24.902  | 24.902  |
| 173.663 | -6.337  | 176.886 | -3.114  | 153.386 | -26.614 |
| 177.595 | -2.405  | 51.992  | 51.992  | 163.985 | -16.015 |
| 2.989   | 2.989   | 15.44   | 15.44   | 5.325   | 5.325   |
| 3.882   | 3.882   | 135     | -45     | 139.132 | -40.868 |
| 174.903 | -5.097  | 28.394  | 28.394  | 86.897  | 86.897  |
| 168.581 | -11.419 | 55.034  | 55.034  | 169.503 | -10.497 |
| 0.505   | 0.505   | 155.223 | -24.777 | 33.863  | 33.863  |
| 162.466 | -17.534 | 161.114 | -18.886 | 177.147 | -2.853  |
| 170.217 | -9.783  | 164.809 | -15.191 | 40.01   | 40.01   |
| 167.479 | -12.521 | 37.73   | 37.73   | 16.424  | 16.424  |
| 164.066 | -15.934 | 25.949  | 25.949  | 12.526  | 12.526  |
| 2.415   | 2.415   | 23.266  | 23.266  | 157.582 | -22.418 |
| 174.881 | -5.119  | 4.201   | 4.201   | 141.911 | -38.089 |
| 0.656   | 0.656   | 24.686  | 24.686  | 10.649  | 10.649  |

|         |         |         |         |         |         |
|---------|---------|---------|---------|---------|---------|
| 2.84    | 2.84    | 140.582 | -39.418 | 42.135  | 42.135  |
| 4.824   | 4.824   | 106.871 | -73.129 | 162.365 | -17.635 |
| 175.554 | -4.446  | 178.926 | -1.074  | 149.395 | -30.605 |
| 151.372 | -28.628 | 148.575 | -31.425 | 159.333 | -20.667 |
| 174.353 | -5.647  | 178.519 | -1.481  | 165.942 | -14.058 |
| 180     | 0       | 0.179   | 0.179   | 10.593  | 10.593  |
| 167.96  | -12.04  | 156.575 | -23.425 | 46.742  | 46.742  |
| 179.192 | -0.808  | 30.009  | 30.009  | 119.712 | -60.288 |
| 98.21   | -81.79  | 23.684  | 23.684  | 12.191  | 12.191  |
| 177.307 | -2.693  | 26.757  | 26.757  | 84.603  | 84.603  |
| 157.29  | -22.71  | 160.181 | -19.819 | 17.334  | 17.334  |
| 145.004 | -34.996 | 126.93  | -53.07  | 156.707 | -23.293 |
| 178.324 | -1.676  | 175.01  | -4.99   | 88.431  | 88.431  |
| 0.918   | 0.918   | 164.488 | -15.512 | 12.132  | 12.132  |
| 178.727 | -1.273  | 175.409 | -4.591  |         |         |
| 178.417 | -1.583  | 13.221  | 13.221  |         |         |
| 138.907 | -41.093 | 17.255  | 17.255  |         |         |
| 176.775 | -3.225  | 157.477 | -22.523 |         |         |
| 179.24  | -0.76   | 8.927   | 8.927   |         |         |
| 175.76  | -4.24   | 44.037  | 44.037  |         |         |
| 176.202 | -3.798  | 22.812  | 22.812  |         |         |
| 10.91   | 10.91   | 19.601  | 19.601  |         |         |
| 0       | 0       | 175.535 | -4.465  |         |         |
| 178.146 | -1.854  | 106.717 | -73.283 |         |         |
| 177.501 | -2.499  | 173.611 | -6.389  |         |         |
| 177.357 | -2.643  | 146.29  | -33.71  |         |         |
| 0       | 0       | 17.8    | 17.8    |         |         |
| 179.184 | -0.816  | 25.816  | 25.816  |         |         |
| 173.036 | -6.964  | 0       | 0       |         |         |
| 2.302   | 2.302   | 165.867 | -14.133 |         |         |
| 179.795 | -0.205  | 143.991 | -36.009 |         |         |
| 7.066   | 7.066   | 130.439 | -49.561 |         |         |
| 3.319   | 3.319   | 163.677 | -16.323 |         |         |
| 174.528 | -5.472  | 0       | 0       |         |         |

|         |         |         |         |
|---------|---------|---------|---------|
| 165.609 | -14.391 | 24.85   | 24.85   |
| 2.067   | 2.067   | 11.232  | 11.232  |
| 177.087 | -2.913  | 5.489   | 5.489   |
| 156.996 | -23.004 | 18.746  | 18.746  |
| 178.526 | -1.474  | 25.419  | 25.419  |
| 173.294 | -6.706  | 10.245  | 10.245  |
| 171.417 | -8.583  | 167.781 | -12.219 |
| 169.901 | -10.099 | 49.506  | 49.506  |
| 174.941 | -5.059  | 45.003  | 45.003  |
| 0.77    | 0.77    | 158.977 | -21.023 |
| 172.956 | -7.044  | 156.716 | -23.284 |
| 163.754 | -16.246 | 10.827  | 10.827  |
| 147.573 | -32.427 | 159.518 | -20.482 |
| 139.277 | -40.723 | 178.539 | -1.461  |
| 175.684 | -4.316  | 12.969  | 12.969  |
| 12.269  | 12.269  | 136.817 | -43.183 |
| 174.321 | -5.679  | 173.35  | -6.65   |
| 179.444 | -0.556  | 111.363 | -68.637 |
| 0       | 0       | 173.601 | -6.399  |
| 179.109 | -0.891  | 0.656   | 0.656   |
| 172.95  | -7.05   | 158.982 | -21.018 |
| 174.611 | -5.389  | 121.96  | -58.04  |
| 131.013 | -48.987 | 116.645 | -63.355 |
| 40.927  | 40.927  | 21.395  | 21.395  |
| 149.625 | -30.375 | 179.148 | -0.852  |
| 28.654  | 28.654  | 2.05    | 2.05    |
| 176.718 | -3.282  | 69.743  | 69.743  |
| 174.028 | -5.972  | 18.998  | 18.998  |
| 7.928   | 7.928   | 4.437   | 4.437   |
| 179.014 | -0.986  | 167.34  | -12.66  |
| 3.638   | 3.638   | 15.499  | 15.499  |
| 41.01   | 41.01   | 163.762 | -16.238 |
| 5.357   | 5.357   | 53.665  | 53.665  |
| 176.514 | -3.486  | 145.571 | -34.429 |

|         |         |
|---------|---------|
| 76.237  | 76.237  |
| 37.042  | 37.042  |
| 0       | 0       |
| 23.464  | 23.464  |
| 19.109  | 19.109  |
| 158.179 | -21.821 |
| 176.91  | -3.09   |
| 3.699   | 3.699   |
| 174.363 | -5.637  |
| 177.123 | -2.877  |
| 19.408  | 19.408  |
| 158.439 | -21.561 |
| 160.373 | -19.627 |
| 13.834  | 13.834  |
| 12.691  | 12.691  |
| 23.877  | 23.877  |
| 156.409 | -23.591 |
| 37.095  | 37.095  |
| 177.144 | -2.856  |
| 112.727 | -67.273 |
| 162.856 | -17.144 |
| 20.456  | 20.456  |
| 164.931 | -15.069 |
| 130.587 | -49.413 |
| 173.053 | -6.947  |
| 166.291 | -13.709 |
| 0.929   | 0.929   |
| 9.767   | 9.767   |
| 178.597 | -1.403  |
| 156.428 | -23.572 |
| 150.014 | -29.986 |
| 1.293   | 1.293   |
| 159.781 | -20.219 |
| 6.687   | 6.687   |



|         |         |
|---------|---------|
| 167.631 | -12.369 |
| 175.66  | -4.34   |
| 25.752  | 25.752  |
| 148.333 | -31.667 |
| 132.166 | -47.834 |
| 150.377 | -29.623 |
| 171.719 | -8.281  |
| 171.241 | -8.759  |
| 151.597 | -28.403 |
| 19.745  | 19.745  |
| 32.799  | 32.799  |
| 173.575 | -6.425  |
| 8.26    | 8.26    |
| 135     | -45     |
| 128.031 | -51.969 |
| 144.821 | -35.179 |
| 127.463 | -52.537 |
| 21.244  | 21.244  |
| 31.93   | 31.93   |
| 7.947   | 7.947   |
| 32.671  | 32.671  |
| 6.407   | 6.407   |
| 163.191 | -16.809 |
| 150.156 | -29.844 |
| 152.577 | -27.423 |
| 163.439 | -16.561 |
| 171.051 | -8.949  |
| 3.658   | 3.658   |
| 1.901   | 1.901   |
| 4.153   | 4.153   |
| 44.161  | 44.161  |
| 160.63  | -19.37  |
| 154.066 | -25.934 |
| 142.382 | -37.618 |

|         |         |
|---------|---------|
| 127.924 | -52.076 |
| 149.779 | -30.221 |
